# Supplementary material for: Metal-catalyzed divergent synthesis from ylides with 3-arylbenzo[d][1,2,3]triazin-4(3H)-ones
Source: Royal Society of Chemistry journal article supplement (doi:10.1039/d4cc04309j), 2024-01-01
Supplement: d4cc04309j1.pdf [file d4cc04309j1.pdf]

# Metal-Catalyzed Divergent Synthesis from Ylides with 3-arylbenzo[d][1,2,3]triazin-4(3H)-ones

Mei-Zhu Bao,<sup>a</sup> Xiao-Ying Pan,<sup>b</sup> Wen-Rong Wu,<sup>a</sup> Lin Xiao,<sup>a</sup> Jidan Liu,<sup>c</sup> Xu-Ge Liu,<sup>\*d</sup> Shang-Shi Zhang,<sup>\*a</sup> Limin Zhao<sup>\*b</sup>

<sup>a</sup>Center for Drug Research and Development, Guangdong Provincial Key Laboratory of Advanced Drug Delivery, Guangdong Provincial Engineering Center of Topical Precise Drug Delivery System, Guangdong Pharmaceutical University, Guangzhou 510006, China.

<sup>b</sup>School of Chemistry and Chemical Engineering, Guangdong Pharmaceutical University, Zhongshan 528458, P. R. China.

<sup>c</sup>School of Chemistry and Chemical Engineering/Institute of Clean Energy and Materials/Guangzhou Key Laboratory for Clean Energy and Materials, Guangzhou University, Guangzhou 510006, P. R. China

<sup>d</sup>The Zhongzhou Laboratory for Integrative Biology, School of Pharmacy, Henan University, Kaifeng, Henan 475004, China.

\*Email: [zhangshangshi@gdpu.edu.cn](mailto:zhangshangshi@gdpu.edu.cn).

\*Email: [zhaolimin@gdpu.edu.cn](mailto:zhaolimin@gdpu.edu.cn).

\*Email: [liuxg7@henu.edu.cn](mailto:liuxg7@henu.edu.cn).

## Supporting Information

|                                                                       |     |
|-----------------------------------------------------------------------|-----|
| 1. General information .....                                          | S2  |
| 2. Synthesis of substrates <b>1</b> , <b>2</b> and <b>3</b> .....     | S3  |
| 3. General procedure and characterization of products.....            | S4  |
| 4. Table 6 Optimization of the reaction conditions <sup>a</sup> ..... | S6  |
| 5. X-Ray crystal data for compound <b>5ba</b> and <b>6ab</b> .....    | S7  |
| 6. Scale-up experiment and mechanism studies.....                     | S29 |
| 7. Product characterization.....                                      | S33 |
| 8. NMR Spectra for New Compounds .....                                | S53 |
| 9. Reference .....                                                    | S97 |

## 1. General information

Unless otherwise noted, all reactions were carried out at room temperature under an atmosphere of nitrogen with flame-dried glassware. If reaction was not conducted at room temperature, reaction temperatures are reported as the temperature of the bath surrounding the vessel unless otherwise stated. The dry solvents used were purified by distillation over the drying agents indicated in parentheses and were transferred under nitrogen: THF (Na-benzophenone), 1,2-dichloroethane (CaH<sub>2</sub>), dichloromethane (CaH<sub>2</sub>). Anhydrous CF<sub>3</sub>CH<sub>2</sub>OH, CH<sub>3</sub>CN, DMF and MeOH were purchased from Acros Organics and stored under nitrogen atmosphere. Commercially available chemicals were obtained from commercial suppliers and used without further purification unless otherwise stated.

Proton NMR (<sup>1</sup>H) were recorded at 400 MHz, and Carbon NMR (<sup>13</sup>C) at 101 MHz NMR spectrometer unless otherwise stated. The following abbreviations are used for the multiplicities: s: singlet, d: doublet, t: triplet, q: quartet, m: multiplet, br s: broad singlet for proton spectra. Coupling constants (*J*) are reported in Hertz (Hz).

High-resolution mass spectra HRMS-ESI (Quadrupole) were recorded on a BRUKER VPEXII spectrometer with EI and ESI mode unless otherwise stated.

Analytical thin layer chromatography was performed on Polygram SIL G/UV<sub>254</sub> plates. Visualization was accomplished with short wave UV light, or KMnO<sub>4</sub> staining solutions followed by heating. Flash column chromatography was performed using silica gel (200-300 mesh) with solvents distilled prior to use.

No attempts were made to optimize yields for substrate synthesis.

## **2. Synthesis of substrates 1, 2 and 3**

The substrates of 1,2,3-benzotriazinone **1**, sulfoxonium ylide **2** and iodonium ylide **3** were prepared according to the previous procedure. <sup>[1-3]</sup> All the characteristic data are consistent with the data reported before.

### 3. General procedure and characterization of products

#### General procedure A

In an oven-dried Schlenk tube under air, a mixture of corresponding 3-phenylbenzo[*d*][1,2,3]triazin-4(3*H*)-one **1** (0.20 mmol, 1.0 equiv), 2-(dimethyl(oxo)- $\lambda^6$ -sulfaneyli-dene)-1-phenylethan-1-one **2** (0.22 mmol, 1.1 equiv), (Cp\**RhCl*<sub>2</sub>)<sub>2</sub> (3.1 mg, 0.005 mmol, 2.5 mol%), AgSbF<sub>6</sub> (6.9 mg, 0.02 mmol, 10 mol%), 1-AdCOOH (36.0 mg, 0.20 mmol, 1.0 equiv), AgF (6.3 mg, 0.05 mmol, 25 mol%), and HFIP (1.0 mL) was stirred at 80-130 °C (oil bath) for 24.0 h. The reaction mixture was then diluted with DCM (10.0 mL) and washed with H<sub>2</sub>O. The aqueous phase was extracted with DCM again. The organic layers were combined, washed with brine and dried over Na<sub>2</sub>SO<sub>4</sub>. The pure product was purified by flash column chromatography on silica with an appropriate solvent to afford the pure product **4**.

#### General procedure B

In an oven-dried Schlenk tube under air, a mixture of corresponding 3-phenylbenzo[*d*][1,2,3]triazin-4(3*H*)-one **1** (0.20 mmol, 1.0 equiv), 2-(phenyl- $\lambda^3$ -iodaneylidene)cyclohexane-1,3-dione **3** (0.30 mmol, 1.5 equiv), (Cp\**IrCl*<sub>2</sub>)<sub>2</sub> (4.0 mg, 0.005 mmol, 2.5 mol%), AgSbF<sub>6</sub> (6.9 mg, 0.02 mmol, 10 mol%), PivOH (20.4 mg, 0.2 mmol, 1.0 equiv) and HFIP (1.0 mL) was stirred at 35 °C (oil bath) for 4.0 h. The reaction mixture was then diluted with DCM (10.0 mL) and washed with H<sub>2</sub>O. The aqueous phase was extracted with DCM again. The organic layers were combined, washed with brine and dried over Na<sub>2</sub>SO<sub>4</sub>. The pure product was purified by flash column chromatography on silica with an appropriate solvent to afford the pure product **5**.

#### General procedure C

In an oven-dried Schlenk tube under air, a mixture of corresponding 3-phenylbenzo[*d*][1,2,3]triazin-4(3*H*)-one **1** (0.20 mmol, 1.0 equiv), 2-(phenyl- $\lambda^3$ -iodaneylidene)cyclohexane-1,3-dione **3** (0.30 mmol, 1.5 equiv), CuBr<sub>2</sub> (4.5 mg, 0.02 mmol, 10 mol%), 4,4'-dimethyl-2,2'-bipyridine (3.7 mg, 0.02 mmol, 10 mol%), 1-AdCOOH

(36.0 mg, 0.20 mmol, 1.0 equiv) and HFIP (1.0 mL) was stirred at 80 °C (oil bath) for 4.0 h. The reaction mixture was then diluted with DCM (10.0 mL) and washed with H<sub>2</sub>O. The aqueous phase was extracted with DCM again. The organic layers were combined, washed with brine and dried over Na<sub>2</sub>SO<sub>4</sub>. The pure product was purified by flash column chromatography on silica with an appropriate solvent to afford the pure product **6**.

#### 4. Table 6 Optimization of the reaction conditions<sup>a</sup>

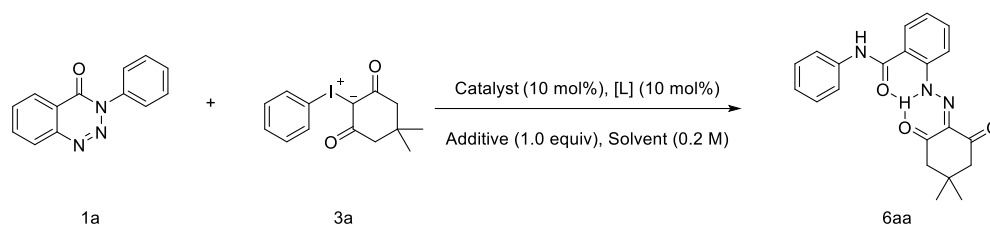

| Entry                 | Catalyst             | [L]                                  | Additives                       | Solvent     | Yields <sup>b</sup> |
|-----------------------|----------------------|--------------------------------------|---------------------------------|-------------|---------------------|
| 1                     | CuBr                 | Xantphos                             |                                 | HFIP        | 5%                  |
| 2                     | CuBr                 | Xantphos                             | KF                              | HFIP        | 15%                 |
| 3                     | CuBr                 | Xantphos                             | Na <sub>2</sub> CO <sub>3</sub> | HFIP        | 21%                 |
| 4                     | CuBr                 | Xantphos                             | NaOAc                           | HFIP        | 32%                 |
| 5                     | CuBr                 | Xantphos                             | CsOPiv                          | HFIP        | 36%                 |
| 6                     | CuBr                 | Xantphos                             | AcOH                            | HFIP        | 31%                 |
| 7                     | CuBr                 | Xantphos                             | B(OH) <sub>3</sub>              | HFIP        | 35%                 |
| 8                     | CuBr                 | Xantphos                             | PivOH                           | HFIP        | 40%                 |
| 9                     | CuBr                 | Xantphos                             | 1-AdCOOH                        | HFIP        | 60%                 |
| 10                    | CuBr                 | Xantphos                             | 1-AdCOOH                        | TFE         | 50%                 |
| 11                    | CuBr                 | Xantphos                             | 1-AdCOOH                        | DCM         | 32%                 |
| 12                    | CuBr                 | Xantphos                             | 1-AdCOOH                        | MeOH        | 24%                 |
| 13                    | CuBr                 | Xantphos                             | 1-AdCOOH                        | MeCN        | 16%                 |
| 14                    | CuBr                 | Xantphos                             | 1-AdCOOH                        | PhCl        | 10%                 |
| 15                    | CuOTf                | Xantphos                             | 1-AdCOOH                        | HFIP        | 40%                 |
| 16                    | Cu(OAc) <sub>2</sub> | Xantphos                             | 1-AdCOOH                        | HFIP        | 36%                 |
| 17                    | CuCl <sub>2</sub>    | Xantphos                             | 1-AdCOOH                        | HFIP        | 31%                 |
| 18                    | CuO                  | Xantphos                             | 1-AdCOOH                        | HFIP        | 27%                 |
| 19                    | NHC-Cu               | Xantphos                             | 1-AdCOOH                        | HFIP        | 15%                 |
| 20                    | CuBr                 | 5,5'-dimethyl-2,2'-bipyridine        | 1-AdCOOH                        | HFIP        | 72%                 |
| 21                    | CuBr                 | ( <i>o</i> -MePh) <sub>3</sub> P     | 1-AdCOOH                        | HFIP        | 58%                 |
| 22                    | CuBr                 | 2,2'-bipyridine                      | 1-AdCOOH                        | HFIP        | 57%                 |
| 23                    | CuBr                 | 2,2'-biquinoline                     | 1-AdCOOH                        | HFIP        | 59%                 |
| 24                    | CuBr                 | 4,4'-dimethoxy-2,2'-bipyridine       | 1-AdCOOH                        | HFIP        | 55%                 |
| 25                    | CuBr                 | 1,10-phenanthroline                  | 1-AdCOOH                        | HFIP        | 27%                 |
| 26                    | CuBr                 | 4,4'-dibromo-2,2'-bipyridine         | 1-AdCOOH                        | HFIP        | 38%                 |
| <b>27<sup>c</sup></b> | <b>CuBr</b>          | <b>5,5'-dimethyl-2,2'-bipyridine</b> | <b>1-AdCOOH</b>                 | <b>HFIP</b> | <b>83%</b>          |
| 28                    |                      | 5,5'-dimethyl-2,2'-bipyridine        | 1-AdCOOH                        | HFIP        | -                   |
| 29                    | CuBr                 | -                                    | 1-AdCOOH                        | HFIP        | 65%                 |

<sup>a</sup>Reaction conditions: **1a** (0.10 mmol), **3a** (0.10 mmol), catalyst (10 mol%), [L] (10 mol%), additives (1.2 equiv.), Solvent (0.2 M), 80 °C, 4 h. <sup>b</sup>Isolated yield. <sup>c</sup>**3a** (0.15 mmol).

## 5. X-Ray crystal data for compound **5ba** and **6ab**

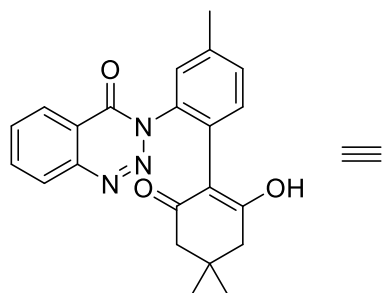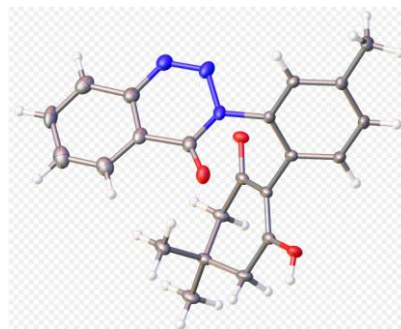

CCDC: 2377169

The crystal structure of **5ba** by X-ray analysis.

X-ray-quality crystal was obtained by slow diffusion of Petroleum ether into a dilute dichloromethane solution of **5ba** at room temperature under air. Thermal ellipsoids drawn at the 50 % probability level. Crystal data were obtained on a SuperNova, Dual, Cu at zero, AtlasS2 diffractometer using Mo K $\alpha$  radiation ( $\lambda = 0.71073 \text{ \AA}$ ). The crystal was kept at 200.00(10) K during data collection.

**Table 1** Crystal data and structure refinement for **5ba**.

|                                  |                                                               |
|----------------------------------|---------------------------------------------------------------|
| Identification code              | <b>5ba</b>                                                    |
| Empirical formula                | C <sub>22</sub> H <sub>21</sub> N <sub>3</sub> O <sub>3</sub> |
| Formula weight                   | 375.42                                                        |
| Temperature/K                    | 149.99(10)                                                    |
| Crystal system                   | monoclinic                                                    |
| Space group                      | P2 <sub>1</sub> /n                                            |
| a/ $\text{\AA}$                  | 10.6241(2)                                                    |
| b/ $\text{\AA}$                  | 20.0539(4)                                                    |
| c/ $\text{\AA}$                  | 18.4446(4)                                                    |
| $\alpha$ / $^\circ$              | 90                                                            |
| $\beta$ / $^\circ$               | 92.354(2)                                                     |
| $\gamma$ / $^\circ$              | 90                                                            |
| Volume/ $\text{\AA}^3$           | 3926.39(14)                                                   |
| Z                                | 8                                                             |
| $\rho_{\text{calc}}/\text{cm}^3$ | 1.270                                                         |
| $\mu/\text{mm}^{-1}$             | 0.697                                                         |
| F(000)                           | 1584.0                                                        |
| Crystal size/ $\text{mm}^3$      | 0.14 $\times$ 0.12 $\times$ 0.1                               |

Radiation Cu K $\alpha$  ( $\lambda = 1.54184$ )  
 2 $\Theta$  range for data collection/ $^{\circ}$  6.514 to 147.35  
 Index ranges  $-13 \leq h \leq 12, -24 \leq k \leq 21, -22 \leq l \leq 17$   
 Reflections collected 15823  
 Independent reflections 7720 [ $R_{\text{int}} = 0.0419, R_{\text{sigma}} = 0.0531$ ]  
 Data/restraints/parameters 7720/419/580  
 Goodness-of-fit on  $F^2$  1.047  
 Final R indexes [ $I \geq 2\sigma(I)$ ]  $R_1 = 0.0746, wR_2 = 0.1969$   
 Final R indexes [all data]  $R_1 = 0.0863, wR_2 = 0.2093$   
 Largest diff. peak/hole / e  $\text{\AA}^{-3}$  0.57/-0.58

### Crystal structure determination of [5ba]

**Crystal Data** for  $\text{C}_{22}\text{H}_{21}\text{N}_3\text{O}_3$  ( $M = 375.42$  g/mol): monoclinic, space group  $P2_1/n$  (no. 14),  $a = 10.6241(2)$   $\text{\AA}$ ,  $b = 20.0539(4)$   $\text{\AA}$ ,  $c = 18.4446(4)$   $\text{\AA}$ ,  $\beta = 92.354(2)^{\circ}$ ,  $V = 3926.39(14)$   $\text{\AA}^3$ ,  $Z = 8$ ,  $T = 149.99(10)$  K,  $\mu(\text{Cu K}\alpha) = 0.697$   $\text{mm}^{-1}$ ,  $D_{\text{calc}} = 1.270$   $\text{g/cm}^3$ , 15823 reflections measured ( $6.514^{\circ} \leq 2\Theta \leq 147.35^{\circ}$ ), 7720 unique ( $R_{\text{int}} = 0.0419, R_{\text{sigma}} = 0.0531$ ) which were used in all calculations. The final  $R_1$  was 0.0746 ( $I > 2\sigma(I)$ ) and  $wR_2$  was 0.2093 (all data).

**Table 2 Fractional Atomic Coordinates ( $\times 10^4$ ) and Equivalent Isotropic Displacement Parameters ( $\text{\AA}^2 \times 10^3$ ) for 5ba.  $U_{\text{eq}}$  is defined as 1/3 of the trace of the orthogonalised  $U_{\text{ij}}$  tensor.**

| Atom | x           | y           | z           | U(eq)   |
|------|-------------|-------------|-------------|---------|
| O1   | 8522(2)     | 7669.8(10)  | 8751.9(11)  | 39.0(5) |
| O2   | 9023.8(16)  | 8745.7(10)  | 10767.0(10) | 30.8(4) |
| O3   | 10633.1(16) | 6733.1(10)  | 9957.8(11)  | 32.6(4) |
| N1   | 6631(2)     | 9268.5(13)  | 9425.8(15)  | 41.8(5) |
| N2   | 6642(2)     | 8748.9(13)  | 9803.8(15)  | 41.2(6) |
| N3   | 7412.9(19)  | 8193.1(12)  | 9563.4(12)  | 31.0(5) |
| C1   | 8101(2)     | 8817.3(14)  | 8547.7(16)  | 33.9(5) |
| C2   | 8824(3)     | 8924.0(18)  | 7956.9(17)  | 45.2(7) |
| C3   | 8843(3)     | 9532.7(19)  | 7648.1(19)  | 52.5(7) |
| C4   | 8123(3)     | 10044.4(17) | 7890(2)     | 50.1(7) |
| C5   | 7370(3)     | 9963.4(17)  | 8476(2)     | 47.4(7) |
| C6   | 7377(3)     | 9320.4(16)  | 8824.7(18)  | 40.8(5) |
| C7   | 8059(3)     | 8173.0(15)  | 8941.3(15)  | 34.0(6) |
| C8   | 7374(2)     | 7643.5(12)  | 10068.9(13) | 24.0(5) |
| C9   | 6209(2)     | 7383.2(13)  | 10213.5(14) | 25.9(5) |
| C10  | 6104(2)     | 6863.2(13)  | 10708.4(14) | 26.1(5) |
| C11  | 7203(2)     | 6615.0(14)  | 11038.1(15) | 30.2(6) |
| C12  | 8362(2)     | 6885.3(14)  | 10892.4(14) | 29.0(5) |
| C13  | 8481(2)     | 7412.8(13)  | 10410.8(13) | 24.2(5) |
| C14  | 9735(2)     | 7731.3(13)  | 10311.9(13) | 24.7(5) |



**Table 2 Fractional Atomic Coordinates ( $\times 10^4$ ) and Equivalent Isotropic Displacement Parameters ( $\text{\AA}^2 \times 10^3$ ) for 5ba.  $U_{\text{eq}}$  is defined as 1/3 of the trace of the orthogonalised  $U_{\text{ij}}$  tensor.**

| Atom | x          | y          | z           | U(eq)    |
|------|------------|------------|-------------|----------|
| C15  | 9906(2)    | 8417.1(14) | 10529.2(13) | 26.5(5)  |
| C16  | 11197(2)   | 8726.5(15) | 10508.5(14) | 30.6(6)  |
| C17  | 12023(2)   | 8442.5(14) | 9921.1(14)  | 29.2(6)  |
| C18  | 10748(2)   | 7378.3(14) | 10086.8(13) | 27.0(5)  |
| C19  | 12022(2)   | 7686.3(15) | 9998.0(15)  | 32.4(6)  |
| C20  | 11504(3)   | 8645.4(17) | 9170.0(15)  | 38.1(7)  |
| C21  | 13366(2)   | 8706.4(17) | 10030.1(16) | 38.2(7)  |
| C22  | 4825(3)    | 6596.9(15) | 10875.5(18) | 37.3(6)  |
| O4   | 4372(5)    | 7430(3)    | 8745(3)     | 29.3(11) |
| O5   | 4372.6(16) | 5892.1(10) | 7118.2(10)  | 30.6(4)  |
| O6   | 2539.1(16) | 6170.5(10) | 9346.0(10)  | 31.4(4)  |
| OA   | 6942(9)    | 6722(4)    | 7358(5)     | 38.7(15) |
| N00F | 4798(7)    | 7366(4)    | 8604(6)     | 36.7(15) |
| N4   | 6768(4)    | 7380(2)    | 7099(2)     | 26.5(9)  |
| N5   | 6608(7)    | 6874(4)    | 7484(4)     | 36.5(14) |
| N6   | 5719(2)    | 6925.6(11) | 8140.9(14)  | 36.4(5)  |
| N7   | 4586(5)    | 7953(2)    | 8376(3)     | 30.6(11) |
| C0   | 5650(6)    | 9129.3(18) | 7006(3)     | 37(3)    |
| C47  | 5019(5)    | 8861(2)    | 7583(3)     | 37.5(15) |
| C46  | 5218(5)    | 8200(2)    | 7784(3)     | 28.3(15) |
| C00{ | 6048(6)    | 7807.4(17) | 7407(3)     | 28.8(15) |
| C01L | 6679(4)    | 8076(2)    | 6829(2)     | 32.8(13) |
| C48  | 6480(5)    | 8737(2)    | 6628(3)     | 37.0(16) |
| C24  | 6391(4)    | 8521(2)    | 6811.2(19)  | 31.2(12) |
| C25  | 5790(5)    | 9124.4(17) | 6928(3)     | 38(2)    |
| C26  | 4923(4)    | 9177.0(14) | 7470(2)     | 36.2(12) |
| C27  | 4657(3)    | 8625.7(19) | 7893.8(18)  | 28.0(10) |
| C28  | 5258(4)    | 8021.9(16) | 7777(2)     | 22.7(12) |
| C23  | 6126(4)    | 7969.4(15) | 7235(2)     | 21.4(10) |
| C29  | 5071(5)    | 7453(2)    | 8245(3)     | 25.7(9)  |
| C30  | 5833(2)    | 6312.6(12) | 8545.3(14)  | 25.3(5)  |
| C31  | 6994(2)    | 6164.1(12) | 8869.1(14)  | 26.5(5)  |
| C32  | 7178(2)    | 5580.4(13) | 9267.9(13)  | 26.0(5)  |
| C33  | 6142(2)    | 5160.5(13) | 9336.5(14)  | 27.8(5)  |
| C34  | 4976(2)    | 5319.5(13) | 9016.0(13)  | 26.7(5)  |
| C35  | 4784(2)    | 5895.5(12) | 8606.3(13)  | 23.0(5)  |

**Table 2 Fractional Atomic Coordinates ( $\times 10^4$ ) and Equivalent Isotropic Displacement Parameters ( $\text{\AA}^2 \times 10^3$ ) for 5ba.  $U_{\text{eq}}$  is defined as 1/3 of the trace of the orthogonalised  $U_{\text{IJ}}$  tensor.**

| Atom | x       | y          | z          | U(eq)    |
|------|---------|------------|------------|----------|
| C36  | 3536(2) | 6038.5(13) | 8242.9(14) | 25.7(5)  |
| C37  | 8436(3) | 5415.7(14) | 9625.1(16) | 35.0(6)  |
| C38  | 2457(2) | 6152.0(14) | 8676.0(15) | 31.6(5)  |
| C39  | 1171(3) | 6192.5(18) | 8289.2(17) | 42.6(7)  |
| C40  | 1184(2) | 6526.2(16) | 7546.1(15) | 34.7(6)  |
| C41  | 2178(2) | 6200.0(17) | 7099.5(16) | 39.3(7)  |
| C42  | 3388(2) | 6047.2(13) | 7505.6(14) | 27.4(5)  |
| C43  | 1538(3) | 7269.5(18) | 7663(2)    | 51.8(8)  |
| C44  | -92(3)  | 6506(3)    | 7161(2)    | 62.5(11) |
| C45  | 6281(8) | 7123(4)    | 7617(4)    | 33.8(13) |

**Table 3 Anisotropic Displacement Parameters ( $\text{\AA}^2 \times 10^3$ ) for 5ba. The Anisotropic displacement factor exponent takes the form:  $-2\pi^2[h^2a^*U_{11}+2hka^*b^*U_{12}+\dots]$ .**

| Atom | $U_{11}$ | $U_{22}$ | $U_{33}$ | $U_{23}$ | $U_{13}$  | $U_{12}$  |
|------|----------|----------|----------|----------|-----------|-----------|
| O1   | 47.5(11) | 31.6(11) | 37.6(11) | 5.0(9)   | -2.4(9)   | -6.6(9)   |
| O2   | 23.1(8)  | 37.7(11) | 32.0(9)  | -5.8(8)  | 4.2(7)    | 1.2(7)    |
| O3   | 25.2(9)  | 34.2(10) | 39.0(10) | -1.7(8)  | 10.3(8)   | 2.4(7)    |
| N1   | 32.5(9)  | 39.3(10) | 53.1(12) | 5.9(8)   | -3.1(8)   | -2.0(8)   |
| N2   | 33.6(12) | 31.4(11) | 57.6(15) | 9.4(10)  | -10.1(11) | -4.6(9)   |
| N3   | 22.8(10) | 35.2(12) | 34.3(11) | 11.3(9)  | -6.9(8)   | -5.5(8)   |
| C1   | 28.5(12) | 29.6(12) | 42.4(14) | 3.7(10)  | -12.2(10) | -9.4(9)   |
| C2   | 45.4(16) | 50.1(16) | 39.6(15) | -4.4(12) | -4.2(12)  | -15.0(13) |
| C3   | 58.1(19) | 57.5(16) | 40.7(16) | 5.9(13)  | -12.5(14) | -21.2(13) |
| C4   | 52.6(17) | 38.1(15) | 57.9(18) | 18.5(13) | -20.3(12) | -22.7(12) |
| C5   | 40.2(15) | 35.9(14) | 64.4(18) | -1.4(13) | -18.3(12) | -5.2(12)  |
| C6   | 30.6(9)  | 39.9(10) | 51.6(12) | 4.6(9)   | -4.0(8)   | -3.8(8)   |
| C7   | 32.1(13) | 37.9(15) | 31.5(12) | 2.9(11)  | -5.0(10)  | -6.2(11)  |
| C8   | 25.1(11) | 23.5(12) | 23.6(11) | 0.8(9)   | 1.7(9)    | 1.2(9)    |
| C9   | 21.0(11) | 27.8(13) | 28.7(12) | 1.0(10)  | -2.4(9)   | 1.0(9)    |
| C10  | 26.6(12) | 23.1(12) | 28.8(12) | 0.2(10)  | 2.6(10)   | -1.2(9)   |
| C11  | 30.8(13) | 27.7(14) | 32.4(13) | 7.7(10)  | 3.8(11)   | 1.6(10)   |
| C12  | 22.5(11) | 35.0(15) | 29.4(13) | 6.6(11)  | 0.8(10)   | 5.9(10)   |
| C13  | 21.0(11) | 30.2(13) | 21.4(11) | -2.0(9)  | 1.6(9)    | 2.6(9)    |
| C14  | 18.7(10) | 33.1(14) | 22.2(11) | 2.6(10)  | 1.5(9)    | 1.0(9)    |
| C15  | 21.8(11) | 37.1(14) | 20.7(11) | -0.5(10) | 2.3(9)    | 0.1(10)   |
| C16  | 21.6(11) | 39.0(15) | 31.4(13) | -7.1(11) | 2.6(10)   | -3.3(10)  |
| C17  | 18.6(11) | 41.9(15) | 27.2(12) | -2.7(11) | 1.4(9)    | -2.1(10)  |

**Table 3 Anisotropic Displacement Parameters ( $\text{\AA}^2 \times 10^3$ ) for 5ba. The Anisotropic displacement factor exponent takes the form:  $-2\pi^2[h^2a^{*2}U_{11}+2hka^*b^*U_{12}+\dots]$ .**

| Atom | $U_{11}$ | $U_{22}$ | $U_{33}$ | $U_{23}$ | $U_{13}$  | $U_{12}$ |
|------|----------|----------|----------|----------|-----------|----------|
| C18  | 21.5(11) | 36.0(14) | 23.7(12) | 1.2(10)  | 2.1(9)    | 1.3(10)  |
| C19  | 19.3(11) | 42.1(16) | 36.0(14) | -4.5(12) | 4.0(10)   | 1.7(10)  |
| C20  | 28.7(13) | 52.4(19) | 33.4(14) | 2.0(13)  | 2.8(11)   | -8.0(12) |
| C21  | 21.6(12) | 53.9(19) | 39.2(15) | -5.2(13) | 2.0(11)   | -6.1(12) |
| C22  | 28.9(13) | 33.4(15) | 49.9(17) | 11.0(13) | 3.1(12)   | -6.9(11) |
| O4   | 28(3)    | 28(2)    | 31.3(19) | 3.4(15)  | -5.6(15)  | 0.4(16)  |
| O5   | 24.6(8)  | 40.6(11) | 27.1(9)  | -0.6(8)  | 4.1(7)    | 5.9(7)   |
| O6   | 28.0(9)  | 37.6(11) | 29.0(8)  | 0.3(7)   | 5.7(7)    | 3.8(7)   |
| OA   | 38(4)    | 30(3)    | 48(3)    | 9(2)     | -2(2)     | -4(2)    |
| N00F | 32(5)    | 21(2)    | 56(5)    | 4(2)     | -15(3)    | -2(2)    |
| N4   | 27.3(18) | 26.0(17) | 26.5(19) | 2.9(13)  | 5.0(14)   | -0.4(13) |
| N5   | 32(5)    | 30(4)    | 46(4)    | 15(3)    | -11.0(19) | -9(2)    |
| N6   | 30.6(11) | 23.3(10) | 54.1(14) | 8.8(9)   | -11.6(10) | -3.9(8)  |
| N7   | 37(2)    | 20(2)    | 35(2)    | -0.9(16) | 2.3(18)   | 4.9(17)  |
| C0   | 46(5)    | 23(4)    | 42(4)    | 6(3)     | -9(4)     | -10(3)   |
| C47  | 45(3)    | 24(3)    | 42(3)    | 5(2)     | -5(3)     | -2(2)    |
| C46  | 31(3)    | 23(3)    | 30(3)    | -0.5(19) | -7(2)     | -6(2)    |
| C00{ | 30(3)    | 26(2)    | 30(3)    | 1.5(19)  | -5(2)     | -6(2)    |
| C01L | 32(3)    | 31(3)    | 36(3)    | 6(2)     | -4(2)     | -7(2)    |
| C48  | 37(3)    | 32(3)    | 41(4)    | 10(2)    | -10(3)    | -8(2)    |
| C24  | 31(2)    | 31(3)    | 31(3)    | 10(2)    | -7.8(19)  | -8(2)    |
| C25  | 38(4)    | 29(3)    | 47(4)    | 11(3)    | -7(3)     | -7(3)    |
| C26  | 41(3)    | 23(2)    | 44(3)    | 3(2)     | -8(2)     | -5(2)    |
| C27  | 29(2)    | 20(2)    | 35(2)    | -1.7(16) | -3.4(18)  | 2.5(16)  |
| C28  | 22(2)    | 18(2)    | 28(2)    | 1.0(15)  | -1.7(18)  | -1.0(16) |
| C23  | 19(2)    | 23.6(19) | 21(2)    | 0.2(16)  | -5.4(17)  | -3.9(15) |
| C29  | 24.3(19) | 22.0(17) | 30(2)    | 5.2(14)  | -9.7(17)  | -5.3(13) |
| C30  | 25.5(10) | 18.9(11) | 31.4(12) | -0.7(9)  | -0.1(9)   | 0.3(8)   |
| C31  | 24.9(10) | 21.9(11) | 32.5(12) | -0.8(9)  | 0.8(9)    | -1.8(9)  |
| C32  | 28.2(10) | 23.8(11) | 26.0(11) | -2.8(9)  | 1.7(9)    | 3.5(8)   |
| C33  | 32.8(10) | 25.1(12) | 25.8(12) | 2.2(9)   | 3.5(9)    | 1.2(9)   |
| C34  | 27.7(10) | 26.0(12) | 27.0(12) | -0.3(9)  | 5.6(9)    | -2.9(9)  |
| C35  | 23.1(10) | 22.6(11) | 23.7(11) | -4.6(8)  | 4.4(8)    | 0.6(8)   |
| C36  | 22.8(10) | 25.5(12) | 29.0(10) | -2.4(9)  | 2.6(8)    | -0.1(9)  |
| C37  | 33.5(12) | 31.0(14) | 40.0(15) | -0.7(12) | -5.1(11)  | 5.1(11)  |
| C38  | 27.6(11) | 36.5(15) | 30.9(10) | -2.4(10) | 4.4(9)    | 1.4(10)  |
| C39  | 28.9(12) | 61(2)    | 37.9(14) | -0.6(13) | 3.4(11)   | -0.9(13) |

**Table 3 Anisotropic Displacement Parameters ( $\text{\AA}^2 \times 10^3$ ) for 5ba. The Anisotropic displacement factor exponent takes the form:  $-2\pi^2[h^2a^{*2}U_{11}+2hka^*b^*U_{12}+\dots]$ .**

| Atom | $U_{11}$ | $U_{22}$ | $U_{33}$ | $U_{23}$ | $U_{13}$  | $U_{12}$ |
|------|----------|----------|----------|----------|-----------|----------|
| C40  | 23.0(11) | 47.5(15) | 33.5(12) | -2.1(11) | 1.3(9)    | 5.9(10)  |
| C41  | 26.3(12) | 60(2)    | 31.2(13) | -7.1(13) | -1.0(10)  | 6.3(12)  |
| C42  | 22.3(10) | 30.6(13) | 29.6(10) | -3.7(10) | 3.8(8)    | 0.4(9)   |
| C43  | 47.5(18) | 47.4(16) | 60(2)    | -1.5(16) | -5.4(16)  | 10.0(14) |
| C44  | 30.0(14) | 110(3)   | 47.2(19) | -13(2)   | -6.4(13)  | 13.1(17) |
| C45  | 30(3)    | 26(3)    | 44(3)    | 4(2)     | -13.7(19) | -7(2)    |

**Table 4 Bond Lengths for 5ba.**

| Atom | Atom | Length/ $\text{\AA}$ | Atom | Atom | Length/ $\text{\AA}$ |
|------|------|----------------------|------|------|----------------------|
| O1   | C7   | 1.181(4)             | N4   | N5   | 1.254(7)             |
| O2   | C15  | 1.240(3)             | N4   | C23  | 1.393(5)             |
| O3   | C18  | 1.320(3)             | N5   | N6   | 1.570(7)             |
| N1   | N2   | 1.253(4)             | N6   | C29  | 1.281(5)             |
| N1   | C6   | 1.393(4)             | N6   | C30  | 1.440(3)             |
| N2   | N3   | 1.463(4)             | N6   | C45  | 1.223(7)             |
| N3   | C7   | 1.362(4)             | N7   | C46  | 1.397(6)             |
| N3   | C8   | 1.445(3)             | C0   | C47  | 1.3900               |
| C1   | C2   | 1.375(4)             | C0   | C48  | 1.3900               |
| C1   | C6   | 1.379(4)             | C47  | C46  | 1.3900               |
| C1   | C7   | 1.484(4)             | C46  | C00{ | 1.3900               |
| C2   | C3   | 1.348(5)             | C00{ | C01L | 1.3900               |
| C3   | C4   | 1.365(6)             | C00{ | C45  | 1.445(7)             |
| C4   | C5   | 1.380(5)             | C01L | C48  | 1.3900               |
| C5   | C6   | 1.441(5)             | C24  | C25  | 1.3900               |
| C8   | C9   | 1.380(3)             | C24  | C23  | 1.3900               |
| C8   | C13  | 1.391(3)             | C25  | C26  | 1.3900               |
| C9   | C10  | 1.393(4)             | C26  | C27  | 1.3900               |
| C10  | C11  | 1.387(4)             | C27  | C28  | 1.3900               |
| C10  | C22  | 1.504(3)             | C28  | C23  | 1.3900               |
| C11  | C12  | 1.382(4)             | C28  | C29  | 1.450(6)             |
| C12  | C13  | 1.390(4)             | C30  | C31  | 1.381(4)             |
| C13  | C14  | 1.495(3)             | C30  | C35  | 1.401(3)             |
| C14  | C15  | 1.442(4)             | C31  | C32  | 1.392(4)             |
| C14  | C18  | 1.367(3)             | C32  | C33  | 1.396(4)             |
| C15  | C16  | 1.508(3)             | C32  | C37  | 1.502(4)             |
| C16  | C17  | 1.532(3)             | C33  | C34  | 1.388(4)             |
| C17  | C19  | 1.523(4)             | C34  | C35  | 1.391(4)             |

**Table 4 Bond Lengths for 5ba.**

| Atom | Atom | Length/Å  | Atom | Atom | Length/Å |
|------|------|-----------|------|------|----------|
| C17  | C20  | 1.525(4)  | C35  | C36  | 1.489(3) |
| C17  | C21  | 1.527(3)  | C36  | C38  | 1.442(3) |
| C18  | C19  | 1.503(3)  | C36  | C42  | 1.363(4) |
| O4   | C29  | 1.209(7)  | C38  | C39  | 1.517(4) |
| O5   | C42  | 1.327(3)  | C39  | C40  | 1.526(4) |
| O6   | C38  | 1.236(3)  | C40  | C41  | 1.514(4) |
| OA   | C45  | 1.180(9)  | C40  | C43  | 1.550(5) |
| N00F | N6   | 1.592(8)  | C40  | C44  | 1.505(4) |
| N00F | N7   | 1.267(10) | C41  | C42  | 1.493(4) |

**Table 5 Bond Angles for 5ba.**

| Atom | Atom | Atom | Angle/°  | Atom | Atom | Atom | Angle/°  |
|------|------|------|----------|------|------|------|----------|
| N2   | N1   | C6   | 120.8(3) | N00F | N7   | C46  | 120.3(6) |
| N1   | N2   | N3   | 117.2(3) | C47  | C0   | C48  | 120.0    |
| C7   | N3   | N2   | 125.9(2) | C46  | C47  | C0   | 120.0    |
| C7   | N3   | C8   | 123.3(2) | C47  | C46  | N7   | 118.3(4) |
| C8   | N3   | N2   | 110.8(2) | C47  | C46  | C00{ | 120.0    |
| C2   | C1   | C6   | 121.2(3) | C00{ | C46  | N7   | 121.7(4) |
| C2   | C1   | C7   | 123.5(3) | C46  | C00{ | C01L | 120.0    |
| C6   | C1   | C7   | 115.3(3) | C46  | C00{ | C45  | 120.6(4) |
| C3   | C2   | C1   | 119.6(4) | C01L | C00{ | C45  | 119.4(4) |
| C2   | C3   | C4   | 121.6(3) | C48  | C01L | C00{ | 120.0    |
| C3   | C4   | C5   | 121.2(3) | C01L | C48  | C0   | 120.0    |
| C4   | C5   | C6   | 117.6(3) | C25  | C24  | C23  | 120.0    |
| N1   | C6   | C5   | 115.5(3) | C24  | C25  | C26  | 120.0    |
| C1   | C6   | N1   | 125.8(3) | C25  | C26  | C27  | 120.0    |
| C1   | C6   | C5   | 118.8(3) | C28  | C27  | C26  | 120.0    |
| O1   | C7   | N3   | 120.3(3) | C27  | C28  | C23  | 120.0    |
| O1   | C7   | C1   | 125.3(3) | C27  | C28  | C29  | 121.2(3) |
| N3   | C7   | C1   | 114.4(3) | C23  | C28  | C29  | 118.7(3) |
| C9   | C8   | N3   | 117.6(2) | C24  | C23  | N4   | 117.4(3) |
| C9   | C8   | C13  | 122.4(2) | C28  | C23  | N4   | 122.6(3) |
| C13  | C8   | N3   | 120.0(2) | C28  | C23  | C24  | 120.0    |
| C8   | C9   | C10  | 120.4(2) | O4   | C29  | N6   | 115.7(5) |
| C9   | C10  | C22  | 119.8(2) | O4   | C29  | C28  | 126.1(4) |
| C11  | C10  | C9   | 117.9(2) | N6   | C29  | C28  | 118.2(5) |
| C11  | C10  | C22  | 122.3(2) | C31  | C30  | N6   | 117.5(2) |
| C12  | C11  | C10  | 121.0(2) | C31  | C30  | C35  | 122.4(2) |

**Table 5 Bond Angles for 5ba.**

| Atom | Atom | Atom | Angle/°  | Atom | Atom | Atom | Angle/°  |
|------|------|------|----------|------|------|------|----------|
| C11  | C12  | C13  | 121.8(2) | C35  | C30  | N6   | 120.0(2) |
| C8   | C13  | C14  | 122.9(2) | C30  | C31  | C32  | 120.9(2) |
| C12  | C13  | C8   | 116.5(2) | C31  | C32  | C33  | 117.5(2) |
| C12  | C13  | C14  | 120.5(2) | C31  | C32  | C37  | 121.3(2) |
| C15  | C14  | C13  | 118.4(2) | C33  | C32  | C37  | 121.2(2) |
| C18  | C14  | C13  | 122.2(2) | C34  | C33  | C32  | 121.1(2) |
| C18  | C14  | C15  | 119.1(2) | C33  | C34  | C35  | 122.0(2) |
| O2   | C15  | C14  | 121.1(2) | C30  | C35  | C36  | 123.0(2) |
| O2   | C15  | C16  | 119.4(2) | C34  | C35  | C30  | 116.1(2) |
| C14  | C15  | C16  | 119.3(2) | C34  | C35  | C36  | 120.8(2) |
| C15  | C16  | C17  | 114.4(2) | C38  | C36  | C35  | 119.7(2) |
| C19  | C17  | C16  | 107.6(2) | C42  | C36  | C35  | 121.0(2) |
| C19  | C17  | C20  | 110.4(2) | C42  | C36  | C38  | 119.3(2) |
| C19  | C17  | C21  | 109.7(2) | O6   | C38  | C36  | 122.2(2) |
| C20  | C17  | C16  | 110.3(2) | O6   | C38  | C39  | 119.6(2) |
| C20  | C17  | C21  | 109.1(2) | C36  | C38  | C39  | 118.0(2) |
| C21  | C17  | C16  | 109.7(2) | C38  | C39  | C40  | 113.9(2) |
| O3   | C18  | C14  | 119.6(2) | C39  | C40  | C43  | 107.9(3) |
| O3   | C18  | C19  | 117.4(2) | C41  | C40  | C39  | 109.3(2) |
| C14  | C18  | C19  | 123.0(2) | C41  | C40  | C43  | 108.7(3) |
| C18  | C19  | C17  | 115.0(2) | C44  | C40  | C39  | 111.8(3) |
| N7   | N00F | N6   | 116.3(8) | C44  | C40  | C41  | 111.5(3) |
| N5   | N4   | C23  | 120.4(5) | C44  | C40  | C43  | 107.4(3) |
| N4   | N5   | N6   | 118.9(6) | C42  | C41  | C40  | 114.9(2) |
| C29  | N6   | N5   | 121.0(4) | O5   | C42  | C36  | 118.3(2) |
| C29  | N6   | C30  | 131.4(3) | O5   | C42  | C41  | 117.3(2) |
| C30  | N6   | N00F | 103.6(4) | C36  | C42  | C41  | 124.4(2) |
| C30  | N6   | N5   | 107.6(3) | OA   | C45  | N6   | 114.7(7) |
| C45  | N6   | N00F | 125.1(5) | OA   | C45  | C00{ | 129.5(7) |
| C45  | N6   | C30  | 130.7(4) | N6   | C45  | C00{ | 115.8(6) |

**Table 6 Torsion Angles for 5ba.**

| A  | B   | C   | D   | Angle/°   | A  | B    | C   | D   | Angle/°   |
|----|-----|-----|-----|-----------|----|------|-----|-----|-----------|
| O2 | C15 | C16 | C17 | -153.2(2) | N5 | N6   | C30 | C35 | -117.1(4) |
| O3 | C18 | C19 | C17 | 161.9(2)  | N6 | N00F | N7  | C46 | -4.8(10)  |
| N1 | N2  | N3  | C7  | -4.4(4)   | N6 | C30  | C31 | C32 | -179.9(2) |
| N1 | N2  | N3  | C8  | 177.5(2)  | N6 | C30  | C35 | C34 | -179.0(2) |
| N2 | N1  | C6  | C1  | 5.5(5)    | N6 | C30  | C35 | C36 | 2.6(4)    |

**Table 6 Torsion Angles for 5ba.**

| A   | B   | C   | D   | Angle/°   | A    | B      | C    | D    | Angle/°   |
|-----|-----|-----|-----|-----------|------|--------|------|------|-----------|
| N2  | N1  | C6  | C5  | -174.4(3) | N7   | N00FN6 | C30  |      | 177.0(6)  |
| N2  | N3  | C7  | O1  | -170.3(2) | N7   | N00FN6 | C45  |      | 4.4(10)   |
| N2  | N3  | C7  | C1  | 9.1(4)    | N7   | C46    | C00{ | C01L | -178.7(6) |
| N2  | N3  | C8  | C9  | 56.9(3)   | N7   | C46    | C00{ | C45  | 0.2(6)    |
| N2  | N3  | C8  | C13 | -120.6(2) | C0   | C47    | C46  | N7   | 178.8(6)  |
| N3  | C8  | C9  | C10 | -178.5(2) | C0   | C47    | C46  | C00{ | 0.0       |
| N3  | C8  | C13 | C12 | 179.6(2)  | C47  | C0     | C48  | C01L | 0.0       |
| N3  | C8  | C13 | C14 | 3.3(4)    | C47  | C46    | C00{ | C01L | 0.0       |
| C1  | C2  | C3  | C4  | -2.5(5)   | C47  | C46    | C00{ | C45  | 178.9(7)  |
| C2  | C1  | C6  | N1  | -178.9(3) | C46  | C00{   | C01L | C48  | 0.0       |
| C2  | C1  | C6  | C5  | 1.1(4)    | C46  | C00{   | C45  | OA   | 179.5(12) |
| C2  | C1  | C7  | O1  | -8.4(4)   | C46  | C00{   | C45  | N6   | -0.8(10)  |
| C2  | C1  | C7  | N3  | 172.2(3)  | C00{ | C01L   | C48  | C0   | 0.0       |
| C2  | C3  | C4  | C5  | 1.9(5)    | C01L | C00{   | C45  | OA   | -1.5(17)  |
| C3  | C4  | C5  | C6  | 0.3(5)    | C01L | C00{   | C45  | N6   | 178.2(5)  |
| C4  | C5  | C6  | N1  | 178.3(3)  | C48  | C0     | C47  | C46  | 0.0       |
| C4  | C5  | C6  | C1  | -1.7(4)   | C24  | C25    | C26  | C27  | 0.0       |
| C6  | N1  | N2  | N3  | -3.3(4)   | C25  | C24    | C23  | N4   | -179.3(4) |
| C6  | C1  | C2  | C3  | 1.0(4)    | C25  | C24    | C23  | C28  | 0.0       |
| C6  | C1  | C7  | O1  | 173.0(3)  | C25  | C26    | C27  | C28  | 0.0       |
| C6  | C1  | C7  | N3  | -6.4(3)   | C26  | C27    | C28  | C23  | 0.0       |
| C7  | N3  | C8  | C9  | -121.3(3) | C26  | C27    | C28  | C29  | 175.3(5)  |
| C7  | N3  | C8  | C13 | 61.2(3)   | C27  | C28    | C23  | N4   | 179.2(4)  |
| C7  | C1  | C2  | C3  | -177.5(3) | C27  | C28    | C23  | C24  | 0.0       |
| C7  | C1  | C6  | N1  | -0.2(4)   | C27  | C28    | C29  | O4   | 3.1(8)    |
| C7  | C1  | C6  | C5  | 179.7(2)  | C27  | C28    | C29  | N6   | -175.1(3) |
| C8  | N3  | C7  | O1  | 7.6(4)    | C23  | N4     | N5   | N6   | -2.6(9)   |
| C8  | N3  | C7  | C1  | -172.9(2) | C23  | C24    | C25  | C26  | 0.0       |
| C8  | C9  | C10 | C11 | -0.8(4)   | C23  | C28    | C29  | O4   | 178.5(6)  |
| C8  | C9  | C10 | C22 | 178.4(2)  | C23  | C28    | C29  | N6   | 0.2(6)    |
| C8  | C13 | C14 | C15 | 61.2(3)   | C29  | N6     | C30  | C31  | -115.2(4) |
| C8  | C13 | C14 | C18 | -124.9(3) | C29  | N6     | C30  | C35  | 64.0(5)   |
| C9  | C8  | C13 | C12 | 2.2(4)    | C29  | C28    | C23  | N4   | 3.8(4)    |
| C9  | C8  | C13 | C14 | -174.1(2) | C29  | C28    | C23  | C24  | -175.5(5) |
| C9  | C10 | C11 | C12 | 1.4(4)    | C30  | N6     | C29  | O4   | -4.8(8)   |
| C10 | C11 | C12 | C13 | -0.2(4)   | C30  | N6     | C29  | C28  | 173.6(3)  |
| C11 | C12 | C13 | C8  | -1.6(4)   | C30  | N6     | C45  | OA   | 7.9(15)   |
| C11 | C12 | C13 | C14 | 174.8(2)  | C30  | N6     | C45  | C00{ | -171.8(4) |

**Table 6 Torsion Angles for 5ba.**

| A      | B   | C    | D   | Angle/°   | A   | B    | C    | D   | Angle/°   |
|--------|-----|------|-----|-----------|-----|------|------|-----|-----------|
| C12    | C13 | C14  | C15 | -115.0(3) | C30 | C31  | C32  | C33 | -1.1(4)   |
| C12    | C13 | C14  | C18 | 58.9(3)   | C30 | C31  | C32  | C37 | -179.7(2) |
| C13    | C8  | C9   | C10 | -1.0(4)   | C30 | C35  | C36  | C38 | -117.2(3) |
| C13    | C14 | C15  | O2  | -2.7(4)   | C30 | C35  | C36  | C42 | 64.5(3)   |
| C13    | C14 | C15  | C16 | 173.6(2)  | C31 | C30  | C35  | C34 | 0.2(4)    |
| C13    | C14 | C18  | O3  | -0.7(4)   | C31 | C30  | C35  | C36 | -178.2(2) |
| C13    | C14 | C18  | C19 | -178.8(2) | C31 | C32  | C33  | C34 | 0.2(4)    |
| C14    | C15 | C16  | C17 | 30.5(3)   | C32 | C33  | C34  | C35 | 0.8(4)    |
| C14    | C18 | C19  | C17 | -20.0(4)  | C33 | C34  | C35  | C30 | -1.0(4)   |
| C15    | C14 | C18  | O3  | 173.1(2)  | C33 | C34  | C35  | C36 | 177.4(2)  |
| C15    | C14 | C18  | C19 | -5.0(4)   | C34 | C35  | C36  | C38 | 64.5(3)   |
| C15    | C16 | C17  | C19 | -51.5(3)  | C34 | C35  | C36  | C42 | -113.8(3) |
| C15    | C16 | C17  | C20 | 69.0(3)   | C35 | C30  | C31  | C32 | 0.9(4)    |
| C15    | C16 | C17  | C21 | -170.7(2) | C35 | C36  | C38  | O6  | 4.0(4)    |
| C16    | C17 | C19  | C18 | 46.3(3)   | C35 | C36  | C38  | C39 | -171.0(3) |
| C18    | C14 | C15  | O2  | -176.8(2) | C35 | C36  | C42  | O5  | 3.3(4)    |
| C18    | C14 | C15  | C16 | -0.5(4)   | C35 | C36  | C42  | C41 | -178.7(3) |
| C20    | C17 | C19  | C18 | -74.1(3)  | C36 | C38  | C39  | C40 | -35.8(4)  |
| C21    | C17 | C19  | C18 | 165.6(2)  | C37 | C32  | C33  | C34 | 178.9(2)  |
| C22    | C10 | C11  | C12 | -177.7(3) | C38 | C36  | C42  | O5  | -175.0(2) |
| O6     | C38 | C39  | C40 | 149.1(3)  | C38 | C36  | C42  | C41 | 3.0(4)    |
| N00FN6 | C30 | C31  |     | -113.0(4) | C38 | C39  | C40  | C41 | 51.6(4)   |
| N00FN6 | C30 | C35  |     | 66.3(4)   | C38 | C39  | C40  | C43 | -66.5(3)  |
| N00FN6 | C45 | OA   |     | 178.3(10) | C38 | C39  | C40  | C44 | 175.6(3)  |
| N00FN6 | C45 | C00{ |     | -1.4(10)  | C39 | C40  | C41  | C42 | -41.5(4)  |
| N00FN7 | C46 | C47  |     | -175.7(6) | C40 | C41  | C42  | O5  | -166.4(3) |
| N00FN7 | C46 | C00{ |     | 3.0(8)    | C40 | C41  | C42  | C36 | 15.6(4)   |
| N4     | N5  | N6   | C29 | 6.6(8)    | C42 | C36  | C38  | O6  | -177.7(3) |
| N4     | N5  | N6   | C30 | -172.4(5) | C42 | C36  | C38  | C39 | 7.3(4)    |
| N5     | N4  | C23  | C24 | 177.0(5)  | C43 | C40  | C41  | C42 | 76.1(3)   |
| N5     | N4  | C23  | C28 | -2.3(7)   | C44 | C40  | C41  | C42 | -165.6(3) |
| N5     | N6  | C29  | O4  | 176.6(6)  | C45 | N6   | C30  | C31 | 58.9(7)   |
| N5     | N6  | C29  | C28 | -5.0(7)   | C45 | N6   | C30  | C35 | -121.8(6) |
| N5     | N6  | C30  | C31 | 63.6(4)   | C45 | C00{ | C01L | C48 | -178.9(7) |

**Table 7 Hydrogen Atom Coordinates ( $\text{\AA} \times 10^4$ ) and Isotropic Displacement Parameters ( $\text{\AA}^2 \times 10^3$ ) for 5ba.**

| Atom | x | y | z | U(eq) |
|------|---|---|---|-------|
|------|---|---|---|-------|



**Table 7 Hydrogen Atom Coordinates ( $\text{\AA}\times 10^4$ ) and Isotropic Displacement Parameters ( $\text{\AA}^2\times 10^3$ ) for 5ba.**

| Atom | x        | y        | z        | U(eq) |
|------|----------|----------|----------|-------|
| H3   | 11288.75 | 6591.62  | 9770.03  | 49    |
| H2   | 9306.62  | 8570.53  | 7767.55  | 54    |
| H3A  | 9370.03  | 9607.71  | 7252.59  | 63    |
| H4   | 8139.88  | 10463.4  | 7649.98  | 60    |
| H5A  | 6866.42  | 10318.57 | 8642.74  | 57    |
| H9   | 5473.13  | 7559.61  | 9974.16  | 31    |
| H11  | 7158.64  | 6253.71  | 11369.17 | 36    |
| H12  | 9098.77  | 6705.65  | 11127.86 | 35    |
| H16A | 11636.11 | 8662.29  | 10987.31 | 37    |
| H16B | 11100.61 | 9212.31  | 10428.97 | 37    |
| H19A | 12395.04 | 7490.61  | 9563.15  | 39    |
| H19B | 12572.96 | 7564.14  | 10423.35 | 39    |
| H20A | 10651    | 8466.49  | 9091.97  | 57    |
| H20B | 12048.84 | 8467.27  | 8800.05  | 57    |
| H20C | 11479.28 | 9132.92  | 9135.24  | 57    |
| H21A | 13358.56 | 9194.2   | 9998.88  | 57    |
| H21B | 13890.79 | 8524.37  | 9652.88  | 57    |
| H21C | 13709.51 | 8569.93  | 10508.51 | 57    |
| H22A | 4372.47  | 6928.73  | 11155.35 | 56    |
| H22B | 4920.54  | 6185.37  | 11158.98 | 56    |
| H22C | 4347.09  | 6502.94  | 10421.08 | 56    |
| H5   | 4175.1   | 5928.87  | 6674.31  | 46    |
| H0   | 5513.47  | 9581.05  | 6868.5   | 44    |
| H47  | 4451.59  | 9129.6   | 7840.93  | 45    |
| H01L | 7245.99  | 7807.08  | 6571.35  | 39    |
| H48  | 6910.69  | 8919.77  | 6233.7   | 44    |
| H24  | 6984     | 8484.67  | 6441.19  | 37    |
| H25  | 5971.93  | 9501.13  | 6638.35  | 46    |
| H26  | 4512.3   | 9589.63  | 7549.64  | 43    |
| H27  | 4064.73  | 8661.67  | 8263.77  | 34    |
| H31  | 7677.04  | 6464.37  | 8818.92  | 32    |
| H33  | 6236.76  | 4759.18  | 9606.99  | 33    |
| H34  | 4286.75  | 5025.82  | 9078.52  | 32    |
| H37A | 9066.63  | 5375.31  | 9254.39  | 52    |
| H37B | 8377.14  | 4993     | 9888.13  | 52    |
| H37C | 8685.39  | 5771.46  | 9965.89  | 52    |
| H39A | 596.14   | 6443.79  | 8597.91  | 51    |

**Table 7 Hydrogen Atom Coordinates ( $\text{\AA} \times 10^4$ ) and Isotropic Displacement Parameters ( $\text{\AA}^2 \times 10^3$ ) for 5ba.**

| Atom | x       | y       | z       | U(eq) |
|------|---------|---------|---------|-------|
| H39B | 829.79  | 5735.68 | 8229.01 | 51    |
| H41A | 1829.34 | 5779.46 | 6894.14 | 47    |
| H41B | 2358.46 | 6497.4  | 6688.15 | 47    |
| H43A | 2372.02 | 7299.81 | 7907.95 | 78    |
| H43B | 913.06  | 7483.52 | 7962.28 | 78    |
| H43C | 1552.71 | 7494.98 | 7191.83 | 78    |
| H44A | -58.77  | 6746.41 | 6699.36 | 94    |
| H44B | -713.25 | 6717.75 | 7464.87 | 94    |
| H44C | -334.34 | 6041.67 | 7067.72 | 94    |

**Table 8 Atomic Occupancy for 5ba.**

| Atom | Occupancy | Atom | Occupancy | Atom | Occupancy |
|------|-----------|------|-----------|------|-----------|
| O4   | 0.544(4)  | OA   | 0.456(4)  | N00F | 0.456(4)  |
| N4   | 0.544(4)  | N5   | 0.544(4)  | N7   | 0.456(4)  |
| C0   | 0.456(4)  | H0   | 0.456(4)  | C47  | 0.456(4)  |
| H47  | 0.456(4)  | C46  | 0.456(4)  | C00{ | 0.456(4)  |
| C01L | 0.456(4)  | H01L | 0.456(4)  | C48  | 0.456(4)  |
| H48  | 0.456(4)  | C24  | 0.544(4)  | H24  | 0.544(4)  |
| C25  | 0.544(4)  | H25  | 0.544(4)  | C26  | 0.544(4)  |
| H26  | 0.544(4)  | C27  | 0.544(4)  | H27  | 0.544(4)  |
| C28  | 0.544(4)  | C23  | 0.544(4)  | C29  | 0.544(4)  |
| C45  | 0.456(4)  |      |           |      |           |

**Table 9 Solvent masks information for 5ba.**

| Number | X      | Y     | Z     | Volume | Electron count Content |
|--------|--------|-------|-------|--------|------------------------|
| 1      | -0.197 | 0.524 | 0.315 | 69.4   | 6.3 ?                  |
| 2      | 0.197  | 0.476 | 0.685 | 69.4   | 6.3 ?                  |
| 3      | 0.303  | 0.976 | 0.815 | 69.4   | 6.3 ?                  |
| 4      | 0.697  | 0.024 | 0.185 | 69.4   | 6.3 ?                  |

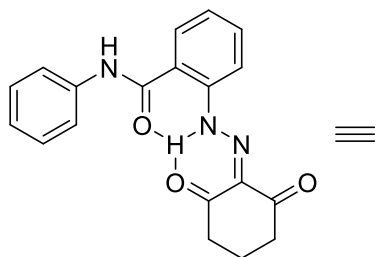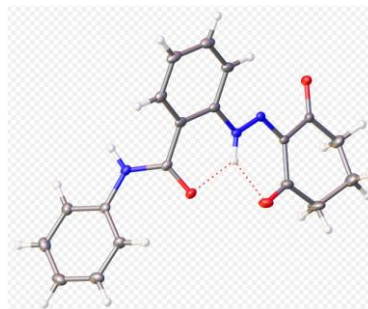

CCDC: 2377170

The crystal structure of **6ab** by X-ray analysis.

X-ray-quality crystal was obtained by slow diffusion of Petroleum ether into a dilute dichloromethane solution of **6ab** at room temperature under air. Thermal ellipsoids drawn at the 50 % probability level. Crystal data were obtained on a SuperNova, Dual, Cu at zero, AtlasS2 diffractometer using Mo K $\alpha$  radiation ( $\lambda = 0.71073 \text{ \AA}$ ). The crystal was kept at 200.00(10) K during data collection.

**Table 1 Crystal data and structure refinement for 6ab.**

|                                  |                                                                               |
|----------------------------------|-------------------------------------------------------------------------------|
| Identification code              | <b>6ab</b>                                                                    |
| Empirical formula                | C <sub>20</sub> H <sub>18</sub> Cl <sub>3</sub> N <sub>3</sub> O <sub>3</sub> |
| Formula weight                   | 454.72                                                                        |
| Temperature/K                    | 150.00(10)                                                                    |
| Crystal system                   | triclinic                                                                     |
| Space group                      | P-1                                                                           |
| a/ $\text{\AA}$                  | 10.2448(4)                                                                    |
| b/ $\text{\AA}$                  | 14.5349(5)                                                                    |
| c/ $\text{\AA}$                  | 14.7931(5)                                                                    |
| $\alpha$ / $^\circ$              | 70.151(3)                                                                     |
| $\beta$ / $^\circ$               | 89.702(3)                                                                     |
| $\gamma$ / $^\circ$              | 85.415(3)                                                                     |
| Volume/ $\text{\AA}^3$           | 2064.74(13)                                                                   |
| Z                                | 4                                                                             |
| $\rho_{\text{calc}}/\text{cm}^3$ | 1.463                                                                         |
| $\mu/\text{mm}^{-1}$             | 4.254                                                                         |
| F(000)                           | 936.0                                                                         |
| Crystal size/ $\text{mm}^3$      | 0.15 $\times$ 0.13 $\times$ 0.12                                              |
| Radiation                        | Cu K $\alpha$ ( $\lambda = 1.54184$ )                                         |

$2\Theta$  range for data collection/ $^{\circ}$  6.354 to 147.526  
 Index ranges  $-12 \leq h \leq 11, -18 \leq k \leq 16, -18 \leq l \leq 17$   
 Reflections collected 14771  
 Independent reflections 8122 [ $R_{\text{int}} = 0.0411, R_{\text{sigma}} = 0.0491$ ]  
 Data/restraints/parameters 8122/7/527  
 Goodness-of-fit on  $F^2$  1.055  
 Final R indexes [ $I \geq 2\sigma(I)$ ]  $R_1 = 0.0590, wR_2 = 0.1578$   
 Final R indexes [all data]  $R_1 = 0.0673, wR_2 = 0.1692$   
 Largest diff. peak/hole /  $e \text{ \AA}^{-3}$  1.09/-0.69

### Crystal structure determination of 6ab

**Crystal Data** for  $\text{C}_{20}\text{H}_{18}\text{Cl}_3\text{N}_3\text{O}_3$  ( $M = 454.72 \text{ g/mol}$ ): triclinic, space group P-1 (no. 2),  $a = 10.2448(4) \text{ \AA}, b = 14.5349(5) \text{ \AA}, c = 14.7931(5) \text{ \AA}, \alpha = 70.151(3)^{\circ}, \beta = 89.702(3)^{\circ}, \gamma = 85.415(3)^{\circ}, V = 2064.74(13) \text{ \AA}^3, Z = 4, T = 150.00(10) \text{ K}, \mu(\text{Cu K}\alpha) = 4.254 \text{ mm}^{-1}, D_{\text{calc}} = 1.463 \text{ g/cm}^3, 14771$  reflections measured ( $6.354^{\circ} \leq 2\Theta \leq 147.526^{\circ}$ ), 8122 unique ( $R_{\text{int}} = 0.0411, R_{\text{sigma}} = 0.0491$ ) which were used in all calculations. The final  $R_1$  was 0.0590 ( $I > 2\sigma(I)$ ) and  $wR_2$  was 0.1692 (all data).

**Table 2 Fractional Atomic Coordinates ( $\times 10^4$ ) and Equivalent Isotropic Displacement Parameters ( $\text{\AA}^2 \times 10^3$ ) for 6ab.  $U_{\text{eq}}$  is defined as 1/3 of the trace of the orthogonalised  $U_{\text{ij}}$  tensor.**

| Atom | x          | y          | z          | U(eq)     |
|------|------------|------------|------------|-----------|
| Cl1  | 1026.8(8)  | 840.0(6)   | -224.7(7)  | 54.4(2)   |
| Cl2  | 3216.3(11) | 835.3(8)   | -1453.9(7) | 70.0(3)   |
| Cl3  | 3642.0(9)  | 891.1(7)   | 452.7(7)   | 60.9(2)   |
| C40  | 2557(3)    | 1259(2)    | -549(2)    | 41.3(6)   |
| Cl4  | 1798.9(7)  | 3310.2(5)  | 300.2(5)   | 44.62(19) |
| Cl5  | 4576.5(8)  | 3455.7(7)  | 446.1(6)   | 53.8(2)   |
| Cl6  | 2742.7(9)  | 4562.0(6)  | 1254.4(6)  | 55.5(2)   |
| C39  | 3068(3)    | 3463(2)    | 1018.3(19) | 38.5(6)   |
| O1   | 8010.8(18) | 2952.5(15) | 6249.0(14) | 38.1(4)   |
| O2   | 6008(2)    | 4205.4(16) | 4599.8(16) | 48.0(5)   |
| O3   | 7902.4(19) | 6643.5(16) | 2091.4(14) | 41.4(5)   |
| N1   | 9550(2)    | 3053.0(16) | 7307.0(16) | 33.1(5)   |
| N2   | 8517(2)    | 4319.0(16) | 4468.3(16) | 30.0(4)   |
| N3   | 8285(2)    | 5050.8(16) | 3673.1(15) | 29.5(4)   |
| C1   | 8833(2)    | 2768.6(18) | 8161.7(19) | 30.9(5)   |
| C2   | 9069(3)    | 3196(2)    | 8846(2)    | 38.8(6)   |

**Table 2 Fractional Atomic Coordinates ( $\times 10^4$ ) and Equivalent Isotropic Displacement Parameters ( $\text{\AA}^2 \times 10^3$ ) for 6ab.  $U_{\text{eq}}$  is defined as 1/3 of the trace of the orthogonalised  $U_{\text{H}}$  tensor.**

| Atom | x          | y           | z          | U(eq)    |
|------|------------|-------------|------------|----------|
| C3   | 8431(3)    | 2904(3)     | 9716(2)    | 49.7(8)  |
| C4   | 7550(3)    | 2195(2)     | 9902(2)    | 49.5(8)  |
| C5   | 7317(3)    | 1772(2)     | 9219(2)    | 47.7(7)  |
| C6   | 7949(3)    | 2055(2)     | 8352(2)    | 39.4(6)  |
| C7   | 9128(2)    | 3099.5(18)  | 6427(2)    | 30.8(5)  |
| C8   | 10144(2)   | 3330.6(18)  | 5668(2)    | 31.4(5)  |
| C9   | 11431(3)   | 2932(2)     | 5890(2)    | 38.3(6)  |
| C10  | 12373(3)   | 3117(2)     | 5185(3)    | 46.8(8)  |
| C11  | 12034(3)   | 3702(2)     | 4257(3)    | 46.9(7)  |
| C12  | 10773(3)   | 4129(2)     | 4021(2)    | 38.7(6)  |
| C13  | 9822(2)    | 3925.9(19)  | 4723(2)    | 30.8(5)  |
| C14  | 7066(2)    | 5373.7(19)  | 3377.5(18) | 30.3(5)  |
| C15  | 6943(3)    | 6234(2)     | 2484.3(19) | 36.4(6)  |
| C16  | 5592(3)    | 6635(3)     | 2079(3)    | 57.0(7)  |
| C17  | 4605(3)    | 5928(3)     | 2319(3)    | 59.0(7)  |
| C18  | 4590(3)    | 5365(3)     | 3394(3)    | 70.2(12) |
| C19  | 5898(3)    | 4925(2)     | 3849(2)    | 42.0(7)  |
| O4   | 4591.0(17) | 2571.9(13)  | 3503.3(14) | 35.0(4)  |
| O5   | 2233(2)    | 1814.4(15)  | 2774.2(14) | 42.4(5)  |
| O6   | 916.0(19)  | -1148.4(14) | 4912.1(14) | 40.2(5)  |
| N4   | 6770.9(19) | 2283.4(14)  | 3923.8(15) | 26.7(4)  |
| N5   | 3298.5(19) | 975.1(14)   | 4480.6(14) | 25.6(4)  |
| N6   | 2456.5(19) | 318.1(14)   | 4604.7(14) | 24.0(4)  |
| C20  | 7343(2)    | 2927.2(17)  | 3092.0(17) | 26.3(5)  |
| C21  | 6628(3)    | 3588(2)     | 2320.2(19) | 34.3(6)  |
| C22  | 7276(3)    | 4202(2)     | 1550(2)    | 39.5(6)  |
| C23  | 8625(3)    | 4163(2)     | 1541.2(19) | 36.5(6)  |
| C24  | 9337(3)    | 3500(2)     | 2310(2)    | 33.5(6)  |
| C25  | 8705(2)    | 2887.9(18)  | 3087.4(18) | 29.0(5)  |
| C26  | 5485(2)    | 2176.0(16)  | 4095.0(18) | 26.0(5)  |
| C27  | 5207(2)    | 1503.3(17)  | 5086.5(17) | 25.2(5)  |
| C28  | 5972(2)    | 1469.1(19)  | 5875.3(19) | 30.2(5)  |
| C29  | 5776(3)    | 810(2)      | 6783.9(19) | 34.9(6)  |
| C30  | 4813(3)    | 161(2)      | 6908.6(18) | 32.5(5)  |
| C31  | 3989(2)    | 213.0(18)   | 6154.5(17) | 27.7(5)  |
| C32  | 4158(2)    | 895.5(16)   | 5242.8(17) | 24.1(5)  |

**Table 2 Fractional Atomic Coordinates ( $\times 10^4$ ) and Equivalent Isotropic Displacement Parameters ( $\text{\AA}^2 \times 10^3$ ) for 6ab.  $U_{eq}$  is defined as 1/3 of the trace of the orthogonalised  $U_{ij}$  tensor.**

| Atom | x       | y          | z          | U(eq)   |
|------|---------|------------|------------|---------|
| C33  | 1615(2) | 368.1(17)  | 3917.5(17) | 25.4(5) |
| C34  | 1516(2) | 1139.3(18) | 2968.6(18) | 30.3(5) |
| C35  | 534(3)  | 1070(2)    | 2245(2)    | 40.0(6) |
| C36  | -660(3) | 546(2)     | 2718(2)    | 45.6(7) |
| C37  | -242(3) | -457(2)    | 3422(2)    | 36.7(6) |
| C38  | 771(2)  | -464.1(18) | 4157.1(18) | 29.2(5) |

**Table 3 Anisotropic Displacement Parameters ( $\text{\AA}^2 \times 10^3$ ) for 6ab. The Anisotropic displacement factor exponent takes the form:  $-2\pi^2[h^2a^2U_{11}+2hka*b*U_{12}+\dots]$ .**

| Atom | $U_{11}$ | $U_{22}$ | $U_{33}$ | $U_{23}$  | $U_{13}$ | $U_{12}$  |
|------|----------|----------|----------|-----------|----------|-----------|
| Cl1  | 39.6(4)  | 57.2(5)  | 62.7(5)  | -16.3(4)  | 1.7(3)   | -0.8(3)   |
| Cl2  | 84.6(7)  | 70.3(6)  | 63.0(6)  | -35.4(5)  | 23.9(5)  | 2.3(5)    |
| Cl3  | 57.2(5)  | 55.5(5)  | 66.1(5)  | -16.7(4)  | -19.6(4) | 1.5(4)    |
| C40  | 48.8(17) | 36.8(14) | 36.7(14) | -11.7(12) | 3.8(12)  | 2.7(12)   |
| Cl4  | 43.4(4)  | 44.1(4)  | 46.1(4)  | -14.2(3)  | -3.1(3)  | -6.9(3)   |
| Cl5  | 40.1(4)  | 74.0(5)  | 44.6(4)  | -16.0(4)  | 3.7(3)   | -6.6(4)   |
| Cl6  | 74.3(6)  | 46.4(4)  | 51.2(4)  | -22.3(3)  | 5.2(4)   | -12.3(4)  |
| C39  | 44.1(15) | 38.0(14) | 27.6(12) | -2.6(11)  | 2.4(11)  | -8.0(12)  |
| O1   | 30.0(9)  | 47.3(11) | 38.5(10) | -14.2(9)  | -0.7(8)  | -12.9(8)  |
| O2   | 37.4(11) | 50.1(12) | 49.4(12) | -5.5(10)  | 12.1(9)  | -14.0(9)  |
| O3   | 32.9(10) | 55.5(12) | 30.5(9)  | -5.3(9)   | -0.5(8)  | -14.4(9)  |
| N1   | 26.1(10) | 35.1(11) | 37.2(12) | -10.5(9)  | -4.0(9)  | -5.7(9)   |
| N2   | 29.8(11) | 33.0(11) | 30.9(11) | -14.5(9)  | 5.9(9)   | -7.9(9)   |
| N3   | 32.2(11) | 34.9(11) | 26.6(10) | -15.6(9)  | 3.4(8)   | -10.2(9)  |
| C1   | 24.9(12) | 28.1(12) | 35.4(13) | -6.2(10)  | -4.5(10) | 3.2(9)    |
| C2   | 37.0(14) | 38.7(14) | 40.4(15) | -14.2(12) | -4.1(11) | 1.4(11)   |
| C3   | 52.8(19) | 54.4(19) | 42.7(16) | -21.0(14) | -1.7(14) | 10.8(15)  |
| C4   | 42.3(17) | 53.0(18) | 43.0(16) | -5.8(14)  | 8.7(13)  | 6.6(14)   |
| C5   | 39.1(16) | 39.9(16) | 52.5(18) | -1.1(13)  | 4.8(13)  | -1.6(12)  |
| C6   | 39.3(15) | 31.0(13) | 43.7(15) | -7.2(11)  | -0.2(12) | -3.5(11)  |
| C7   | 27.2(12) | 24.9(12) | 41.1(14) | -12.4(10) | -2.8(10) | -1.8(9)   |
| C8   | 30.5(13) | 26.0(12) | 45.0(14) | -20.5(11) | 4.5(11)  | -7.1(10)  |
| C9   | 31.6(13) | 31.8(13) | 59.3(18) | -26.2(13) | -2.1(12) | -0.5(10)  |
| C10  | 26.8(13) | 47.4(17) | 81(2)    | -41.2(17) | 6.6(14)  | -1.9(12)  |
| C11  | 37.4(15) | 49.3(17) | 68(2)    | -36.7(16) | 17.1(14) | -11.0(13) |
| C12  | 35.4(14) | 41.2(15) | 46.6(16) | -22.7(13) | 12.6(12) | -11.0(12) |

**Table 3 Anisotropic Displacement Parameters ( $\text{\AA}^2 \times 10^3$ ) for 6ab. The Anisotropic displacement factor exponent takes the form:  $-2\pi^2[h^2a^{*2}U_{11}+2hka^*b^*U_{12}+\dots]$ .**

| Atom | $U_{11}$ | $U_{22}$ | $U_{33}$ | $U_{23}$  | $U_{13}$  | $U_{12}$  |
|------|----------|----------|----------|-----------|-----------|-----------|
| C13  | 27.8(12) | 30.4(12) | 42.4(14) | -22.3(11) | 4.9(10)   | -5.7(10)  |
| C14  | 27.1(12) | 37.7(13) | 31.3(12) | -16.9(11) | 4.8(10)   | -9.7(10)  |
| C15  | 31.7(13) | 52.2(16) | 27.4(12) | -14.6(12) | 0.7(10)   | -11.3(12) |
| C16  | 35.9(12) | 69.7(16) | 57.1(15) | -10.0(13) | -8.7(11)  | -8.1(11)  |
| C17  | 36.8(12) | 69.7(16) | 61.3(15) | -9.7(13)  | -8.7(11)  | -7.8(11)  |
| C18  | 30.0(16) | 90(3)    | 68(2)    | 4(2)      | 8.6(16)   | -13.3(17) |
| C19  | 33.2(14) | 50.4(17) | 43.9(16) | -16.1(13) | 11.9(12)  | -12.9(12) |
| O4   | 23.5(9)  | 31.4(9)  | 41.4(10) | -1.1(8)   | -1.7(7)   | -2.6(7)   |
| O5   | 41.6(11) | 39.6(11) | 35.0(10) | 4.6(8)    | -4.3(8)   | -16.3(9)  |
| O6   | 35.5(10) | 34.8(10) | 38.6(10) | 4.6(8)    | -5.9(8)   | -11.4(8)  |
| N4   | 22.9(10) | 26.1(10) | 27.6(10) | -4.3(8)   | 1.3(8)    | -4.0(8)   |
| N5   | 22.9(9)  | 24.1(9)  | 26.5(10) | -4.2(8)   | 3.0(8)    | -3.7(7)   |
| N6   | 21.5(9)  | 23.7(9)  | 26.9(9)  | -8.6(8)   | 3.6(7)    | -1.9(7)   |
| C20  | 29.1(12) | 24.2(11) | 27.7(11) | -10.1(9)  | 2.5(9)    | -8.8(9)   |
| C21  | 31.7(13) | 35.0(13) | 31.7(13) | -5.0(11)  | -0.3(10)  | -5.0(10)  |
| C22  | 45.3(16) | 36.9(14) | 29.6(13) | -2.1(11)  | -0.8(11)  | -5.8(12)  |
| C23  | 46.5(16) | 35.9(14) | 28.5(12) | -10.7(11) | 9.1(11)   | -13.3(12) |
| C24  | 33.0(13) | 34.2(13) | 36.1(13) | -13.8(11) | 9.1(10)   | -11.3(10) |
| C25  | 29.2(12) | 26.8(11) | 29.4(12) | -6.7(10)  | 2.2(9)    | -5.3(9)   |
| C26  | 23.6(11) | 21.6(11) | 33.3(12) | -9.6(9)   | 2.4(9)    | -3.0(9)   |
| C27  | 22.8(11) | 23.5(11) | 29.7(12) | -9.9(9)   | 5.0(9)    | 0.0(9)    |
| C28  | 27.5(12) | 33.3(13) | 35.2(13) | -18.5(11) | 5.0(10)   | -4.5(10)  |
| C29  | 32.9(13) | 49.1(15) | 28.4(12) | -20.1(11) | 2.8(10)   | -5.9(11)  |
| C30  | 32.9(13) | 40.8(14) | 24.3(12) | -11.4(10) | 5.2(10)   | -3.8(11)  |
| C31  | 26.6(12) | 30.4(12) | 27.0(12) | -10.5(10) | 7.1(9)    | -5.0(9)   |
| C32  | 21.5(11) | 22.8(11) | 28.4(11) | -9.8(9)   | 2.7(9)    | 0.5(8)    |
| C33  | 22.7(11) | 24.8(11) | 26.3(11) | -6.1(9)   | 2.3(9)    | -0.7(9)   |
| C34  | 29.8(12) | 30.0(12) | 26.7(12) | -3.7(10)  | 1.7(9)    | -2.6(10)  |
| C35  | 44.7(16) | 40.9(15) | 30.0(13) | -4.9(11)  | -6.1(11)  | -8.6(12)  |
| C36  | 43.8(16) | 45.0(16) | 44.3(16) | -9.5(13)  | -11.1(13) | -7.1(13)  |
| C37  | 35.4(14) | 34.4(13) | 38.6(14) | -9.0(11)  | -4.3(11)  | -7.4(11)  |
| C38  | 24.1(11) | 28.5(12) | 33.5(13) | -8.3(10)  | 2.9(9)    | -2.8(9)   |

**Table 4 Bond Lengths for 6ab .**

| Atom Atom | Length/ $\text{\AA}$ | Atom Atom | Length/ $\text{\AA}$ |
|-----------|----------------------|-----------|----------------------|
| C11 C40   | 1.734(3)             | C16 C17   | 1.456(5)             |
| C12 C40   | 1.764(3)             | C17 C18   | 1.522(5)             |

**Table 4 Bond Lengths for 6ab .**

| Atom | Atom | Length/Å | Atom | Atom | Length/Å |
|------|------|----------|------|------|----------|
| C13  | C40  | 1.761(3) | C18  | C19  | 1.496(5) |
| C14  | C39  | 1.757(3) | O4   | C26  | 1.232(3) |
| C15  | C39  | 1.760(3) | O5   | C34  | 1.227(3) |
| C16  | C39  | 1.754(3) | O6   | C38  | 1.218(3) |
| O1   | C7   | 1.227(3) | N4   | C20  | 1.425(3) |
| O2   | C19  | 1.238(4) | N4   | C26  | 1.351(3) |
| O3   | C15  | 1.229(3) | N5   | N6   | 1.304(3) |
| N1   | C1   | 1.412(3) | N5   | C32  | 1.402(3) |
| N1   | C7   | 1.352(3) | N6   | C33  | 1.316(3) |
| N2   | N3   | 1.298(3) | C20  | C21  | 1.383(4) |
| N2   | C13  | 1.411(3) | C20  | C25  | 1.392(3) |
| N3   | C14  | 1.320(3) | C21  | C22  | 1.389(4) |
| C1   | C2   | 1.387(4) | C22  | C23  | 1.379(4) |
| C1   | C6   | 1.387(4) | C23  | C24  | 1.381(4) |
| C2   | C3   | 1.389(4) | C24  | C25  | 1.386(3) |
| C3   | C4   | 1.381(5) | C26  | C27  | 1.502(3) |
| C4   | C5   | 1.379(5) | C27  | C28  | 1.394(3) |
| C5   | C6   | 1.382(4) | C27  | C32  | 1.414(3) |
| C7   | C8   | 1.499(4) | C28  | C29  | 1.385(4) |
| C8   | C9   | 1.391(4) | C29  | C30  | 1.388(4) |
| C8   | C13  | 1.396(4) | C30  | C31  | 1.380(4) |
| C9   | C10  | 1.390(4) | C31  | C32  | 1.396(3) |
| C10  | C11  | 1.376(5) | C33  | C34  | 1.467(3) |
| C11  | C12  | 1.380(4) | C33  | C38  | 1.486(3) |
| C12  | C13  | 1.393(4) | C34  | C35  | 1.506(4) |
| C14  | C15  | 1.477(4) | C35  | C36  | 1.531(4) |
| C14  | C19  | 1.467(4) | C36  | C37  | 1.506(4) |
| C15  | C16  | 1.503(4) | C37  | C38  | 1.504(4) |

**Table 5 Bond Angles for 6ab.**

| Atom | Atom | Atom | Angle/°    | Atom | Atom | Atom | Angle/°    |
|------|------|------|------------|------|------|------|------------|
| C11  | C40  | C12  | 110.89(17) | O2   | C19  | C14  | 120.3(3)   |
| C11  | C40  | C13  | 111.02(16) | O2   | C19  | C18  | 121.9(3)   |
| C13  | C40  | C12  | 109.88(17) | C14  | C19  | C18  | 117.8(3)   |
| C14  | C39  | C15  | 110.22(16) | C26  | N4   | C20  | 127.8(2)   |
| C16  | C39  | C14  | 110.04(17) | N6   | N5   | C32  | 118.72(19) |
| C16  | C39  | C15  | 110.61(15) | N5   | N6   | C33  | 121.1(2)   |
| C7   | N1   | C1   | 126.4(2)   | C21  | C20  | N4   | 124.0(2)   |



**Table 5 Bond Angles for 6ab.**

| Atom | Atom | Atom | Angle/°  | Atom | Atom | Atom | Angle/°  |
|------|------|------|----------|------|------|------|----------|
| N3   | N2   | C13  | 119.0(2) | C21  | C20  | C25  | 119.4(2) |
| N2   | N3   | C14  | 120.1(2) | C25  | C20  | N4   | 116.5(2) |
| C2   | C1   | N1   | 118.2(2) | C20  | C21  | C22  | 119.8(3) |
| C2   | C1   | C6   | 119.4(3) | C23  | C22  | C21  | 121.0(3) |
| C6   | C1   | N1   | 122.4(3) | C22  | C23  | C24  | 119.2(2) |
| C1   | C2   | C3   | 120.1(3) | C23  | C24  | C25  | 120.5(2) |
| C4   | C3   | C2   | 120.3(3) | C24  | C25  | C20  | 120.1(2) |
| C5   | C4   | C3   | 119.4(3) | O4   | C26  | N4   | 124.7(2) |
| C4   | C5   | C6   | 120.7(3) | O4   | C26  | C27  | 121.1(2) |
| C5   | C6   | C1   | 120.0(3) | N4   | C26  | C27  | 114.3(2) |
| O1   | C7   | N1   | 123.7(3) | C28  | C27  | C26  | 120.7(2) |
| O1   | C7   | C8   | 121.5(2) | C28  | C27  | C32  | 118.5(2) |
| N1   | C7   | C8   | 114.8(2) | C32  | C27  | C26  | 120.8(2) |
| C9   | C8   | C7   | 120.2(3) | C29  | C28  | C27  | 121.2(2) |
| C9   | C8   | C13  | 118.6(3) | C28  | C29  | C30  | 119.4(2) |
| C13  | C8   | C7   | 121.2(2) | C31  | C30  | C29  | 120.8(2) |
| C10  | C9   | C8   | 120.7(3) | C30  | C31  | C32  | 119.9(2) |
| C11  | C10  | C9   | 119.9(3) | N5   | C32  | C27  | 119.9(2) |
| C10  | C11  | C12  | 120.7(3) | C31  | C32  | N5   | 120.3(2) |
| C11  | C12  | C13  | 119.4(3) | C31  | C32  | C27  | 119.8(2) |
| C8   | C13  | N2   | 120.0(2) | N6   | C33  | C34  | 124.9(2) |
| C12  | C13  | N2   | 119.3(3) | N6   | C33  | C38  | 114.3(2) |
| C12  | C13  | C8   | 120.7(3) | C34  | C33  | C38  | 120.8(2) |
| N3   | C14  | C15  | 114.4(2) | O5   | C34  | C33  | 120.2(2) |
| N3   | C14  | C19  | 124.9(3) | O5   | C34  | C35  | 121.4(2) |
| C19  | C14  | C15  | 120.6(2) | C33  | C34  | C35  | 118.4(2) |
| O3   | C15  | C14  | 121.9(2) | C34  | C35  | C36  | 112.6(2) |
| O3   | C15  | C16  | 119.9(3) | C37  | C36  | C35  | 110.6(3) |
| C14  | C15  | C16  | 118.1(2) | C38  | C37  | C36  | 114.5(2) |
| C17  | C16  | C15  | 115.3(3) | O6   | C38  | C33  | 121.4(2) |
| C16  | C17  | C18  | 111.9(3) | O6   | C38  | C37  | 120.6(2) |
| C19  | C18  | C17  | 115.1(3) | C33  | C38  | C37  | 118.0(2) |

**Table 6 Torsion Angles for 6ab.**

| A  | B   | C   | D   | Angle/°   | A  | B   | C   | D   | Angle/°   |
|----|-----|-----|-----|-----------|----|-----|-----|-----|-----------|
| O1 | C7  | C8  | C9  | -140.3(3) | O4 | C26 | C27 | C28 | -145.5(2) |
| O1 | C7  | C8  | C13 | 38.1(4)   | O4 | C26 | C27 | C32 | 34.1(3)   |
| O3 | C15 | C16 | C17 | 155.9(3)  | O5 | C34 | C35 | C36 | -151.4(3) |

**Table 6 Torsion Angles for 6ab.**

| A   | B   | C   | D   | Angle/°   | A   | B   | C   | D   | Angle/°   |
|-----|-----|-----|-----|-----------|-----|-----|-----|-----|-----------|
| N1  | C1  | C2  | C3  | -177.0(3) | N4  | C20 | C21 | C22 | 178.5(2)  |
| N1  | C1  | C6  | C5  | 177.0(3)  | N4  | C20 | C25 | C24 | -179.1(2) |
| N1  | C7  | C8  | C9  | 38.7(3)   | N4  | C26 | C27 | C28 | 35.5(3)   |
| N1  | C7  | C8  | C13 | -143.0(2) | N4  | C26 | C27 | C32 | -145.0(2) |
| N2  | N3  | C14 | C15 | 177.6(2)  | N5  | N6  | C33 | C34 | -0.4(4)   |
| N2  | N3  | C14 | C19 | -4.4(4)   | N5  | N6  | C33 | C38 | 177.0(2)  |
| N3  | N2  | C13 | C8  | 163.0(2)  | N6  | N5  | C32 | C27 | 170.4(2)  |
| N3  | N2  | C13 | C12 | -17.8(3)  | N6  | N5  | C32 | C31 | -9.1(3)   |
| N3  | C14 | C15 | O3  | -4.3(4)   | N6  | C33 | C34 | O5  | -1.6(4)   |
| N3  | C14 | C15 | C16 | 178.3(3)  | N6  | C33 | C34 | C35 | 177.6(2)  |
| N3  | C14 | C19 | O2  | 2.4(5)    | N6  | C33 | C38 | O6  | -3.5(4)   |
| N3  | C14 | C19 | C18 | -177.7(3) | N6  | C33 | C38 | C37 | 178.6(2)  |
| C1  | N1  | C7  | O1  | 4.7(4)    | C20 | N4  | C26 | O4  | 6.7(4)    |
| C1  | N1  | C7  | C8  | -174.3(2) | C20 | N4  | C26 | C27 | -174.3(2) |
| C1  | C2  | C3  | C4  | -0.6(5)   | C20 | C21 | C22 | C23 | 0.2(4)    |
| C2  | C1  | C6  | C5  | -0.4(4)   | C21 | C20 | C25 | C24 | -0.6(4)   |
| C2  | C3  | C4  | C5  | 0.5(5)    | C21 | C22 | C23 | C24 | 0.1(4)    |
| C3  | C4  | C5  | C6  | -0.4(5)   | C22 | C23 | C24 | C25 | -0.6(4)   |
| C4  | C5  | C6  | C1  | 0.4(5)    | C23 | C24 | C25 | C20 | 0.9(4)    |
| C6  | C1  | C2  | C3  | 0.5(4)    | C25 | C20 | C21 | C22 | 0.1(4)    |
| C7  | N1  | C1  | C2  | -148.2(3) | C26 | N4  | C20 | C21 | 2.4(4)    |
| C7  | N1  | C1  | C6  | 34.3(4)   | C26 | N4  | C20 | C25 | -179.2(2) |
| C7  | C8  | C9  | C10 | 178.0(2)  | C26 | C27 | C28 | C29 | -176.1(2) |
| C7  | C8  | C13 | N2  | -0.2(3)   | C26 | C27 | C32 | N5  | -5.2(3)   |
| C7  | C8  | C13 | C12 | -179.4(2) | C26 | C27 | C32 | C31 | 174.3(2)  |
| C8  | C9  | C10 | C11 | 0.1(4)    | C27 | C28 | C29 | C30 | 1.0(4)    |
| C9  | C8  | C13 | N2  | 178.2(2)  | C28 | C27 | C32 | N5  | 174.3(2)  |
| C9  | C8  | C13 | C12 | -1.0(4)   | C28 | C27 | C32 | C31 | -6.2(3)   |
| C9  | C10 | C11 | C12 | 1.6(4)    | C28 | C29 | C30 | C31 | -4.8(4)   |
| C10 | C11 | C12 | C13 | -3.0(4)   | C29 | C30 | C31 | C32 | 2.9(4)    |
| C11 | C12 | C13 | N2  | -176.5(2) | C30 | C31 | C32 | N5  | -177.9(2) |
| C11 | C12 | C13 | C8  | 2.7(4)    | C30 | C31 | C32 | C27 | 2.6(4)    |
| C13 | N2  | N3  | C14 | 174.0(2)  | C32 | N5  | N6  | C33 | 178.9(2)  |
| C13 | C8  | C9  | C10 | -0.4(4)   | C32 | C27 | C28 | C29 | 4.4(4)    |
| C14 | C15 | C16 | C17 | -26.7(5)  | C33 | C34 | C35 | C36 | 29.5(4)   |
| C15 | C14 | C19 | O2  | -179.7(3) | C34 | C33 | C38 | O6  | 174.0(2)  |
| C15 | C14 | C19 | C18 | 0.2(4)    | C34 | C33 | C38 | C37 | -3.8(4)   |
| C15 | C16 | C17 | C18 | 50.7(5)   | C34 | C35 | C36 | C37 | -55.6(4)  |

**Table 6 Torsion Angles for 6ab.**

| A   | B   | C   | D   | Angle/°   | A   | B   | C   | D   | Angle/°   |
|-----|-----|-----|-----|-----------|-----|-----|-----|-----|-----------|
| C16 | C17 | C18 | C19 | -50.1(5)  | C35 | C36 | C37 | C38 | 52.8(4)   |
| C17 | C18 | C19 | O2  | -155.5(4) | C36 | C37 | C38 | O6  | 158.7(3)  |
| C17 | C18 | C19 | C14 | 24.5(5)   | C36 | C37 | C38 | C33 | -23.5(4)  |
| C19 | C14 | C15 | O3  | 177.6(3)  | C38 | C33 | C34 | O5  | -178.8(3) |
| C19 | C14 | C15 | C16 | 0.2(4)    | C38 | C33 | C34 | C35 | 0.3(4)    |

**Table 7 Hydrogen Atom Coordinates ( $\text{\AA} \times 10^4$ ) and Isotropic Displacement Parameters ( $\text{\AA}^2 \times 10^3$ ) for 6ab.**

| Atom | x        | y        | z        | U(eq)  |
|------|----------|----------|----------|--------|
| H40  | 2456.45  | 1993.15  | -809.03  | 50     |
| H39  | 3114.04  | 2904.18  | 1642.55  | 46     |
| H1   | 10350.07 | 3216.03  | 7351.36  | 40     |
| H2   | 7860(40) | 4030(30) | 4850(30) | 78(14) |
| H2A  | 9667.53  | 3688.75  | 8719.92  | 47     |
| H3   | 8601.33  | 3194.02  | 10185.76 | 60     |
| H4   | 7108.12  | 1999.44  | 10495.44 | 59     |
| H5   | 6716.17  | 1280.52  | 9346.77  | 57     |
| H6   | 7776.84  | 1761.62  | 7885.34  | 47     |
| H9   | 11668.31 | 2528.14  | 6529.91  | 46     |
| H10  | 13248.52 | 2839.95  | 5343.03  | 56     |
| H11  | 12674.31 | 3813.03  | 3772.96  | 56     |
| H12  | 10555.21 | 4557.21  | 3386.5   | 46     |
| H16A | 5300.95  | 7179.57  | 2312.09  | 68     |
| H16B | 5640.59  | 6914.51  | 1370.16  | 68     |
| H17A | 4782.98  | 5458.67  | 1971.55  | 71     |
| H17B | 3731.64  | 6277.24  | 2102.91  | 71     |
| H18A | 4217.28  | 5815.7   | 3719.91  | 84     |
| H18B | 3999.36  | 4832.77  | 3506.03  | 84     |
| H4A  | 7321.24  | 1911.13  | 4380.76  | 32     |
| H5A  | 3326.48  | 1459.04  | 3929.15  | 31     |
| H21  | 5698.36  | 3621.47  | 2316.46  | 41     |
| H22  | 6781.65  | 4656.17  | 1022.45  | 47     |
| H23  | 9058.99  | 4586.04  | 1012.1   | 44     |
| H24  | 10266.74 | 3462.87  | 2307.11  | 40     |
| H25  | 9202.39  | 2440.77  | 3617.72  | 35     |
| H28  | 6641.43  | 1905.86  | 5788.24  | 36     |
| H29  | 6295.07  | 802.23   | 7316.92  | 42     |
| H30  | 4719.4   | -324.94  | 7520.21  | 39     |

**Table 7 Hydrogen Atom Coordinates ( $\text{\AA}\times 10^4$ ) and Isotropic Displacement Parameters ( $\text{\AA}^2\times 10^3$ ) for 6ab.**

| <b>Atom</b> | <b>x</b> | <b>y</b> | <b>z</b> | <b>U(eq)</b> |
|-------------|----------|----------|----------|--------------|
| H31         | 3307.41  | -215.19  | 6255.56  | 33           |
| H35A        | 963.82   | 712.32   | 1846.85  | 48           |
| H35B        | 238.11   | 1740.31  | 1813.48  | 48           |
| H36A        | -1152.53 | 940.15   | 3056.3   | 55           |
| H36B        | -1247.26 | 481.54   | 2217.06  | 55           |
| H37A        | -1023.95 | -749.47  | 3761.95  | 44           |
| H37B        | 112      | -879     | 3060.19  | 44           |

## 6. Scale-up experiment and mechanism studies

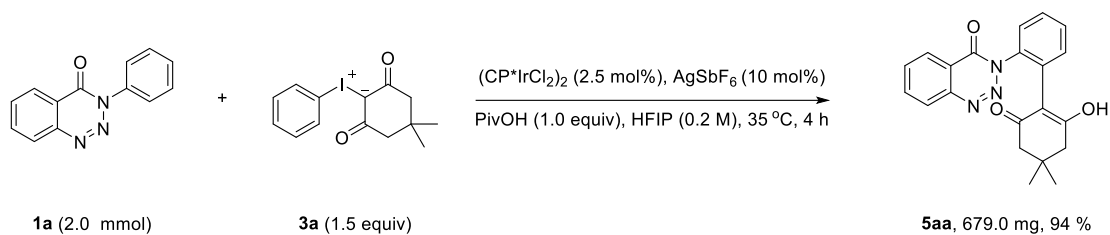

In an oven-dried Schlenk tube under air, a mixture of 3-phenylbenzo[*d*][1,2,3]triazin-4(3*H*)-one **1a** (2.0 mmol, 1.0 equiv), 5,5-dimethyl-2-(phenyl- $\lambda^3$ -iodaneylidene)cyclohexane-1,3-dione **3a** (3.0 mmol, 1.5 equiv), (Cp\*IrCl<sub>2</sub>)<sub>2</sub> (39.8 mg, 0.05 mmol, 2.5 mol%), AgSbF<sub>6</sub> (68.6 mg, 0.2 mmol, 10 mol%), PivOH (204.0 mg, 2.0 mmol, 1.0 equiv) and HFIP (10.0 mL) was stirred at 35 °C (oil bath) for 4.0 h. Upon completion of reaction, the solvent was evaporated under reduced pressure and the crude product was directly purified by a silica gel column chromatography by using EA/PE = 1/1 as the eluent to afford the corresponding product **5aa** (679.0 mg, 94 %).

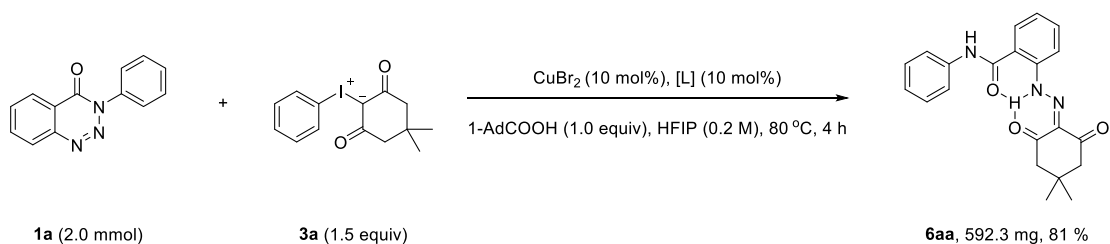

In an oven-dried Schlenk tube under air, a mixture of 3-phenylbenzo[*d*][1,2,3]triazin-4(3*H*)-one **1a** (2.0 mmol, 1.0 equiv), 5,5-dimethyl-2-(phenyl- $\lambda^3$ -iodaneylidene)cyclohexane-1,3-dione **3a** (3.0 mmol, 1.5 equiv), CuBr<sub>2</sub> (44.6 mg, 0.2 mmol, 10 mol%), 4,4'-dimethyl-2,2'-bipyridine (36.8 mg, 0.2 mmol, 10 mol%), 1-AdCOOH (360.0 mg, 2.0 mmol, 1.0 equiv) and HFIP (10.0 mL) was stirred at 80 °C (oil bath) for 4.0 h. The reaction mixture was then diluted with DCM (10.0 mL) and washed with H<sub>2</sub>O. The aqueous phase was extracted with DCM again. The organic layers were combined, washed with brine and dried over Na<sub>2</sub>SO<sub>4</sub>. The pure product was purified by flash column chromatography by using EA/PE = 1/2 as the eluent to afford the pure product **6aa** (592.3 mg, 81 %).

## Competitive reaction between benzotriazinone substrates.

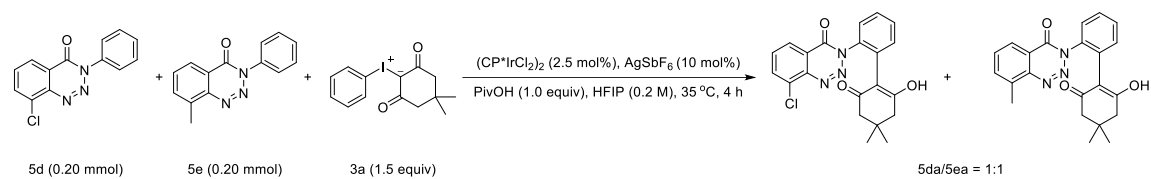

In a 10 mL oven dried reaction tube with a magnetic stir bar was charged with **5d** (51.5 mg, 0.2 mmol, 1.0 equiv), **5e** (47.5 mg, 0.2 mmol, 1.0 equiv), 5,5-dimethyl-2-(phenyl- $\lambda^3$ -iodaneylidene)cyclohexane-1,3-dione **3a** (102.9 mg, 0.30 mmol, 1.5 equiv),  $(\text{Cp}^*\text{IrCl}_2)_2$  (4.0 mg, 0.005 mmol, 2.5 mol%),  $\text{PivOH}$  (20.4 mg, 0.20 mmol, 1.0 equiv),  $\text{AgSbF}_6$  (6.9 mg, 0.02 mmol, 10 mol%) and HFIP (1.0 mL) was added. Then, the tube was capped with septa and the resulting mixture was stirred at 35 °C for 4.0 h. The solvent was evaporated under reduced pressure, and **5da** and **5ea** were obtained directly by silica gel column chromatography. The mass of **5da** and **5ea** is 39.6 mg and 37.5 mg respectively.

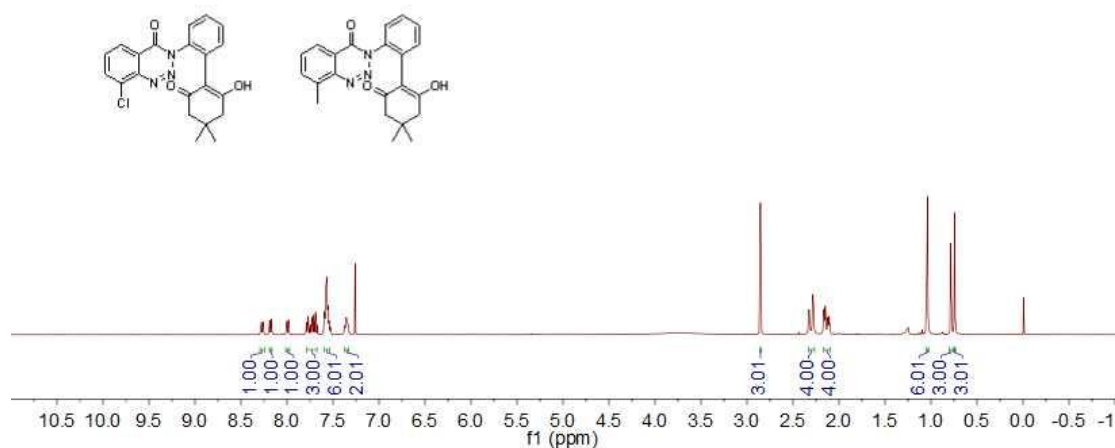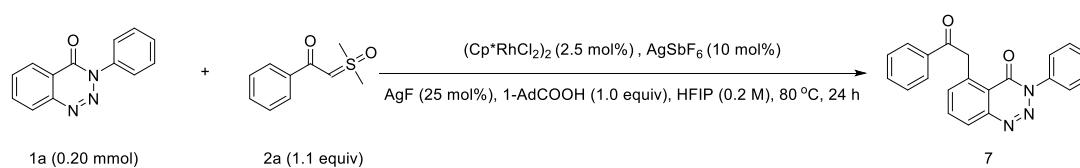

In an oven-dried Schlenk tube under air, a mixture of corresponding 3-phenylbenzo[*d*][1,2,3]triazin-4(3*H*)-one **1a** (0.20 mmol, 1.0 equiv), 2-(dimethyl(oxo)-*l*<sup>6</sup>-sulfaneylidene)-1-phenylethan-1-one **2a** (0.22 mmol, 1.1 equiv), (Cp\**RhCl*<sub>2</sub>)<sub>2</sub> (3.1 mg, 0.005 mmol, 2.5 mol%), AgSbF<sub>6</sub> (6.9 mg, 0.02 mmol, 10 mol%), 1-AdCOOH (36.0 mg, 0.20 mmol, 1.0 equiv), AgF (6.3 mg, 0.05 mmol, 25 mol%), and HFIP (1.0 mL) was stirred at 80 °C (oil bath) for 24.0 h. The reaction mixture was then diluted with DCM (10.0 mL) and washed with H<sub>2</sub>O. The aqueous phase was extracted with DCM again. The organic layers were combined, washed with brine and dried over Na<sub>2</sub>SO<sub>4</sub>. The pure product was purified by flash column chromatography on silica with an appropriate solvent to afford the pure product **7**, the product **7** was obtained in 0 % yield.

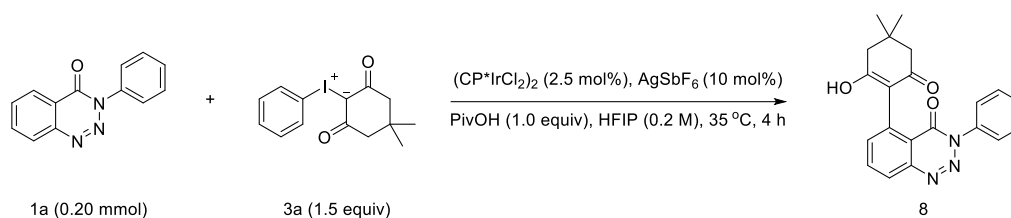

In an oven-dried Schlenk tube under air, a mixture of corresponding 3-phenylbenzo[*d*][1,2,3]triazin-4(3*H*)-one **1a** (0.20 mmol, 1.0 equiv), 5,5-dimethyl-2-(phenyl-*l*<sup>3</sup>-iodaneylidene)cyclohexane-1,3-dione **3a** (0.30 mmol, 1.5 equiv), (Cp\**IrCl*<sub>2</sub>)<sub>2</sub> (4.0 mg, 0.005 mmol, 2.5 mol%), AgSbF<sub>6</sub> (6.9 mg, 0.02 mmol, 10 mol%), PivOH (20.4 mg, 0.2 mmol, 1.0 equiv) and HFIP (1.0 mL) was stirred at 35 °C (oil bath) for 4.0 h. The reaction mixture was then diluted with DCM (10.0 mL) and washed with H<sub>2</sub>O. The aqueous phase was extracted with DCM again. The organic layers were combined, washed with brine and dried over Na<sub>2</sub>SO<sub>4</sub>. The pure product was purified by flash column chromatography on silica with an appropriate solvent to afford the pure product **8**, the product **8** was obtained in 0 % yield.

**Conclusion:** The results of competitive experiments show that the directing ability of nitrogen atoms is greater than that of carbonyl oxygen atoms, and the electrical properties of the 1,2,3-benzotriazinone have little effect on the product **5** yield.

## Procedure for kinetic isotopic effect experiments

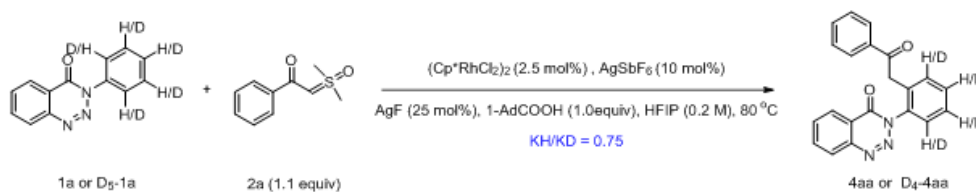

The kinetic isotope effect (KIE) was determined by measuring the initial rates of the reactions with hydrogenated and deuterated substrates. Five reactions with hydrogenated substrates and five reactions with deuterated substrates were stopped at 3.0, 4.0, 5.0, 6.0 and 7.0 h, using the following procedure: in an oven-dried Schlenk tube under air, a mixture of 3-phenylbenzo[*d*][1,2,3]triazin-4(3*H*)-one **1a** or **D<sub>5</sub>-1a** (0.10 mmol, 1.0 equiv), 2-(dimethyl(oxo)- $\lambda^6$ -sulfaneyli-dene)-1-phenylethan-1-one **2a** (21.6 mg, 0.11 mmol, 1.1 equiv),  $(\text{Cp}^*\text{RhCl}_2)_2$  (1.5 mg, 0.0025 mmol, 2.5 mol%),  $\text{AgSbF}_6$  (3.4 mg, 0.01 mmol, 10 mol%), 1-AdCOOH (18.0 mg, 0.10 mmol, 1.0 equiv),  $\text{AgF}$  (3.2 mg, 0.025 mmol, 25 mol%) and HFIP (0.5 mL) was stirred at 80 °C (oil bath) for the indicated time. Quickly cooled to room temperature under the ice water. the solvent was evaporated under reduced pressure and the crude product was directly purified by a silica gel column chromatography by using EA/PE = 1/4 as the eluent to afford the corresponding the yield. The  $K_H/K_D$  value was  $3/4 = 0.75$ .

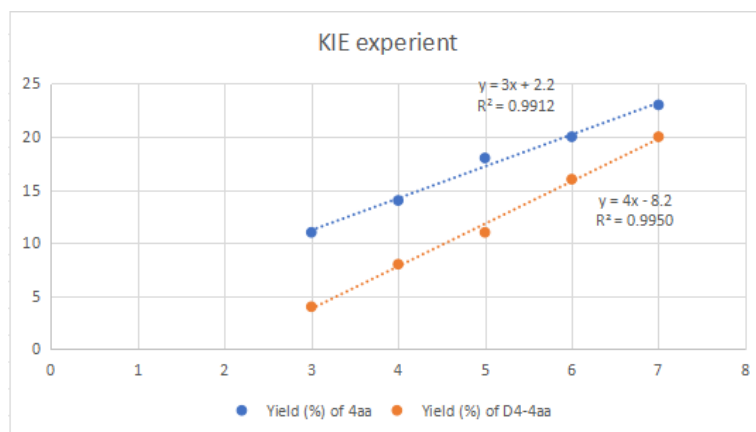

$$\text{For } \mathbf{4aa}: y = 3X + 2.2; R^2 = 0.9912$$

$$\text{For } \mathbf{D_4-4aa}: y = 4X - 8.2; R^2 = 0.9950$$

$$\text{KIE} = K_H/K_D = 0.75$$

**Conclusion:** KIE results indicate that the reaction rate may not undergo the first-order kinetic process.



## 7. Product characterization

### 3-(2-(2-oxo-2-phenylethyl)phenyl)benzo[d][1,2,3]triazin-4(3H)-one (4aa)

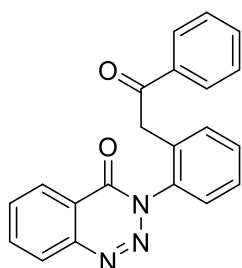

Following the above procedure 4, the product **4aa** was obtained in 78 % yield (53.2 mg, 0.156 mmol) as a yellow solid after column chromatography (eluent = Petroleum ether/EtOAc 4:1 v/v). R<sub>f</sub> (Petroleum ether/EtOAc 4:1): 0.26. <sup>1</sup>H NMR (400 MHz, CDCl<sub>3</sub>) δ 8.32 (d, *J* = 7.9 Hz, 1H), 8.12 (d, *J* = 8.1 Hz, 1H), 7.91 (t, *J* = 7.7 Hz, 1H), 7.78 (t, *J* = 8.0 Hz, 3H), 7.45 (d, 4H), 7.38 (t, *J* = 7.4 Hz, 1H), 7.26 (t, *J* = 7.3 Hz, 2H), 4.24 (s, 2H). <sup>13</sup>C NMR (101 MHz, CDCl<sub>3</sub>) δ 196.39, 155.14, 143.56, 137.76, 137.42, 136.15, 135.13, 133.07, 132.86, 132.78, 131.60, 129.96, 128.47, 128.40, 128.27, 128.24, 125.37, 120.04, 41.48. ESI-MS: calculated C<sub>21</sub>H<sub>16</sub>N<sub>3</sub>O<sub>2</sub> [M+H]<sup>+</sup> 342.1237; Found 342.1230.

### 3-(2-(2-oxo-2-(p-tolyl)ethyl)phenyl)benzo[d][1,2,3]triazin-4(3H)-one (4ab)

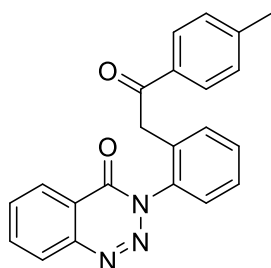

Following the above procedure 4, the product **4ab** was obtained in 52 % yield (37.3 mg, 0.104 mmol) as a yellow oil after column chromatography (eluent = Petroleum ether/EtOAc 4:1 v/v). R<sub>f</sub> (Petroleum ether/EtOAc 4:1): 0.22. <sup>1</sup>H NMR (400 MHz, CDCl<sub>3</sub>) δ 8.37 (d, *J* = 7.9, 1.0 Hz, 1H), 8.16 (d, *J* = 7.8 Hz, 1H), 7.96 (t, *J* = 8.2, 7.8, 1.4 Hz, 1H), 7.86 – 7.77 (t, 1H), 7.68 (d, *J* = 8.2 Hz, 2H), 7.57 – 7.38 (m, 4H), 7.07 (d, *J* = 8.0 Hz, 2H), 4.21 (s, 2H), 2.29 (s, 3H). <sup>13</sup>C NMR (101 MHz, CDCl<sub>3</sub>) δ 196.26, 155.35, 144.06, 143.84, 137.88, 135.16, 133.94, 133.33, 132.83, 131.71, 130.19, 129.27, 128.70, 128.65, 128.56, 128.38, 125.67, 120.32, 41.56, 21.70. ESI-MS: calculated C<sub>22</sub>H<sub>18</sub>N<sub>3</sub>O<sub>2</sub> [M+H]<sup>+</sup> 356.1394; Found 356.1389.

### 3-(2-(2-(3,5-dimethylphenyl)-2-oxoethyl)phenyl)benzo[d][1,2,3]triazin-4(3H)-one (4ac)

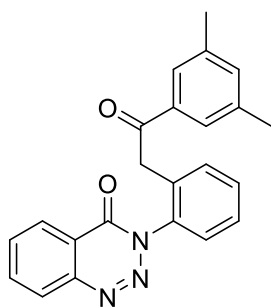

Following the above procedure 4, the product **4ac** was obtained in 55 % yield (40.6 mg, 0.110 mmol) as a yellow oil after column chromatography (eluent = Petroleum ether/EtOAc 4:1 v/v). Rf (Petroleum ether/EtOAc 4:1): 0.21. <sup>1</sup>H NMR (400 MHz, CDCl<sub>3</sub>) δ 8.36 (dd, *J* = 7.9, 1.2 Hz, 1H), 8.16 (d, *J* = 8.1 Hz, 1H), 8.00 – 7.90 (m, 1H), 7.84 – 7.76 (m, 1H), 7.55 – 7.41 (m, 4H), 7.37 (s, 2H), 7.01 (s, 1H), 4.21 (s, 2H), 2.22 (s, 6H). <sup>13</sup>C NMR (101 MHz, CDCl<sub>3</sub>) δ 196.98, 155.30, 143.76, 138.19, 137.83, 136.53, 135.17, 134.86, 133.30, 132.79, 131.74, 130.15, 128.63, 128.52, 128.35, 126.22, 125.60, 120.30, 41.53, 21.19. ESI-MS: calculated C<sub>23</sub>H<sub>19</sub>N<sub>3</sub>O<sub>2</sub>Na [M+Na]<sup>+</sup> 392.1369; Found 392.1360.

### 3-(2-(2-(3,4-dimethoxyphenyl)-2-oxoethyl)phenyl)benzo[d][1,2,3]triazin-4(3H)-one (4ad)

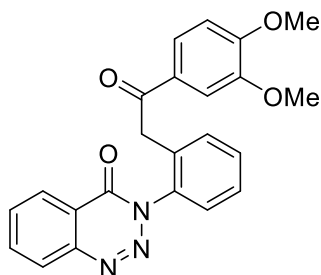

Following the above procedure 4, the product **4ad** was obtained in 39 % yield (31.3 mg, 0.078 mmol) as a yellow solid after column chromatography (eluent = Petroleum ether/EtOAc 2:1 v/v). Rf (Petroleum ether/EtOAc 2:1): 0.25. <sup>1</sup>H NMR (400 MHz, CDCl<sub>3</sub>) δ 8.34 (d, *J* = 7.9 Hz, 1H), 8.14 (d, *J* = 8.1 Hz, 1H), 7.95 (t, *J* = 7.7 Hz, 1H), 7.80 (t, *J* = 7.6 Hz, 1H), 7.50 – 7.39 (m, 5H), 7.32 (d, *J* = 1.6 Hz, 1H), 6.65 (d, *J* = 8.4 Hz, 1H), 4.18 (s, 2H), 3.83 (d, *J* = 3.0 Hz, 6H). <sup>13</sup>C NMR (101 MHz, CDCl<sub>3</sub>) δ 195.33, 155.23, 153.13, 148.75, 143.71, 137.63, 135.11, 133.66, 132.72, 131.44, 130.14, 129.47, 128.54, 128.47, 128.26, 125.50, 123.22, 120.19, 110.39, 109.75, 55.97, 55.92, 41.10. ESI-MS: calculated C<sub>23</sub>H<sub>20</sub>N<sub>3</sub>O<sub>4</sub> [M+H]<sup>+</sup> 402.1448; Found 402.1449.

### 3-(2-(2-(3-methoxyphenyl)-2-oxoethyl)phenyl)benzo[d][1,2,3]triazin-4(3H)-one (4ae)

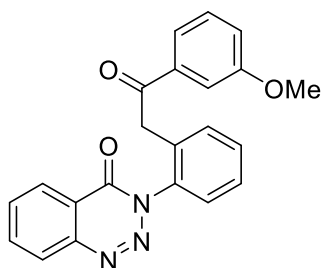

Following the above procedure 4, the product **4ae** was obtained in 42 % yield (31.2 mg, 0.084 mmol) as a yellow solid after column chromatography (eluent = Petroleum ether/EtOAc 4:1 v/v). Rf (Petroleum ether/EtOAc 4:1): 0.21. <sup>1</sup>H NMR (400 MHz, CDCl<sub>3</sub>) δ 8.36 (dd, 1H), 8.16 (d, *J* = 8.1 Hz, 1H), 8.00 – 7.93 (m, 1H), 7.85 – 7.77 (m, 1H), 7.55 – 7.42 (m, 4H), 7.37 (d, *J* = 7.7 Hz, 1H), 7.33 – 7.28 (m, 1H), 7.18 (t, *J* = 7.9

Hz, 1H), 6.98 – 6.90 (m, 1H), 4.23 (s, 2H), 3.75 (s, 3H). <sup>13</sup>C NMR (101 MHz, CDCl<sub>3</sub>) δ 196.46, 159.72, 155.32, 143.85, 137.82, 137.66, 135.24, 135.19, 133.11, 132.90, 131.66, 130.29, 129.49, 128.64, 128.51, 128.39, 125.65, 121.15, 120.01, 112.33, 55.48, 41.74. ESI-MS: calculated C<sub>22</sub>H<sub>18</sub>N<sub>3</sub>O<sub>3</sub> [M+H]<sup>+</sup> 372.1343; Found 372.1336.

### 3-(2-(2-oxo-2-(m-tolyl)ethyl)phenyl)benzo[d][1,2,3]triazin-4(3H)-one (4af)

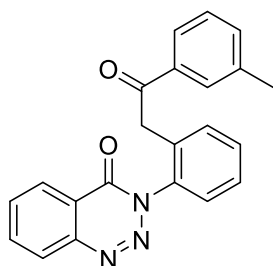

Following the above procedure 4, the product **4af** was obtained in 50 % yield (35.5 mg, 0.100 mmol) as a yellow solid after column chromatography (eluent = Petroleum ether/EtOAc 6:1 v/v). R<sub>f</sub> (Petroleum ether/EtOAc 6:1): 0.25. <sup>1</sup>H NMR (400 MHz, CDCl<sub>3</sub>) δ 8.40 – 8.34 (dd, 1H), 8.16 (d, *J* = 7.7 Hz, 1H), 7.96 (td, *J* = 8.2, 7.8, 1.4 Hz, 1H), 7.84 – 7.78 (m, 1H), 7.59 (d, *J* = 7.0 Hz, 2H), 7.54 – 7.39 (m, 4H), 7.19 (dt, *J* = 15.8, 7.5 Hz, 2H), 4.23 (s, 2H), 2.27 (s, 3H). <sup>13</sup>C NMR (101 MHz, CDCl<sub>3</sub>) δ 196.70, 155.25, 143.72, 138.31, 137.79, 136.34, 135.14, 133.93, 133.07, 132.78, 131.65, 130.09, 128.87, 128.61, 128.47, 128.38, 128.33, 125.63, 125.56, 120.22, 41.53, 21.25. ESI-MS: calculated C<sub>22</sub>H<sub>18</sub>N<sub>3</sub>O<sub>2</sub> [M+H]<sup>+</sup> 356.1394; Found 356.1387.

### 3-(2-(2-(4-chlorophenyl)-2-oxoethyl)phenyl)benzo[d][1,2,3]triazin-4(3H)-one (4ag)

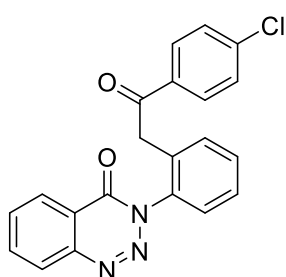

Following the above procedure 4, the product **4ag** was obtained in 33 % yield (24.6 mg, 0.066 mmol) as a yellow solid after column chromatography (eluent = Petroleum ether/EtOAc 8:1 v/v). R<sub>f</sub> (Petroleum ether/EtOAc 8:1): 0.21. <sup>1</sup>H NMR (400 MHz, CDCl<sub>3</sub>) δ 8.35 (dd, *J* = 7.9, 1.1 Hz, 1H), 8.16 (d, *J* = 8.6 Hz, 1H), 7.98 (td, *J* = 8.2, 7.8, 1.4 Hz, 1H), 7.89 – 7.80 (m, 1H), 7.74 – 7.69 (m, 2H), 7.54 – 7.41 (m, 4H), 7.27 – 7.21 (m, 2H), 4.20 (s, 2H). <sup>13</sup>C NMR (101 MHz, CDCl<sub>3</sub>) δ 195.51, 155.33, 143.78, 139.70, 137.82, 135.36, 134.68, 133.01, 132.81, 131.69, 130.29, 129.93, 128.91, 128.73, 128.66, 128.61, 125.62, 120.21, 41.66. ESI-MS: calculated C<sub>21</sub>H<sub>15</sub>N<sub>3</sub>O<sub>2</sub>Cl [M+H]<sup>+</sup> 376.0847; Found 376.0843.

### 3-(2-(2-(4-bromophenyl)-2-oxoethyl)phenyl)benzo[d][1,2,3]triazin-4(3H)-one (4ah)

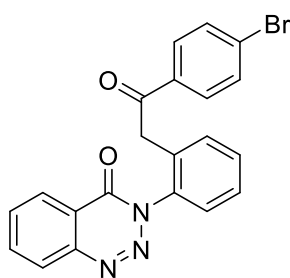

Following the above procedure 4, the product **4ah** was obtained in 40 % yield (33.3 mg, 0.080 mmol) as a yellow solid after column chromatography (eluent = Petroleum ether/EtOAc 8:1 v/v). Rf (Petroleum ether/EtOAc 8:1): 0.24. <sup>1</sup>H NMR (400 MHz, CDCl<sub>3</sub>) δ 8.34 (dd, *J* = 7.9, 1.2 Hz, 1H), 8.16 (d, *J* = 8.0 Hz, 1H), 7.98 (td, *J* = 8.3, 7.8, 1.4 Hz, 1H), 7.87 – 7.79 (m, 1H), 7.67 – 7.60 (m, 2H), 7.52 – 7.38 (m, 6H), 4.19 (s, 2H). <sup>13</sup>C NMR (101 MHz, CDCl<sub>3</sub>) δ 195.71, 155.32, 143.76, 137.80, 135.36, 135.07, 133.01, 132.79, 131.88, 131.69, 130.28, 130.00, 128.72, 128.66, 128.60, 128.49, 125.60, 120.19, 41.62. ESI-MS: calculated C<sub>21</sub>H<sub>15</sub>N<sub>3</sub>O<sub>2</sub>Br [M+H]<sup>+</sup> 420.0342; Found 420.0338.

### 3-(2-(2-(naphthalen-2-yl)-2-oxoethyl)phenyl)benzo[d][1,2,3]triazin-4(3H)-one (4ai)

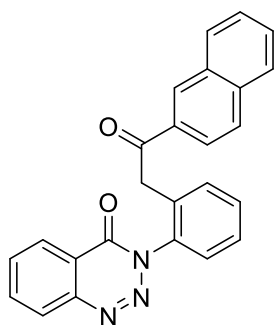

Following the above procedure 4, the product **4ai** was obtained in 57 % yield (44.6 mg, 0.114 mmol) as a yellow solid after column chromatography (eluent = Petroleum ether/EtOAc 6:1 v/v). Rf (Petroleum ether/EtOAc 6:1): 0.27. <sup>1</sup>H NMR (400 MHz, CDCl<sub>3</sub>) δ 8.30 (dd, *J* = 8.0, 1.1 Hz, 1H), 8.28 (s, 1H), 8.04 (d, *J* = 8.6 Hz, 1H), 7.91 – 7.78 (m, 3H), 7.78 – 7.65 (m, 3H), 7.60 – 7.42 (m, 6H), 4.36 (s, 2H). <sup>13</sup>C NMR (101 MHz, CDCl<sub>3</sub>) δ 196.59, 155.31, 143.60, 137.73, 135.44, 135.02, 133.64, 133.31, 132.68, 132.24, 131.65, 130.34, 130.19, 129.66, 128.54, 128.53, 128.43, 128.40, 128.40, 127.62, 126.67, 125.37, 123.97, 120.07, 41.45. ESI-MS: calculated C<sub>25</sub>H<sub>18</sub>N<sub>3</sub>O<sub>2</sub> [M+H]<sup>+</sup> 392.1394; Found 392.1386.

### 3-(2-(2-(1-methyl-1H-pyrrol-2-yl)-2-oxoethyl)phenyl)benzo[d][1,2,3]triazin-4(3H)-one (4aj)

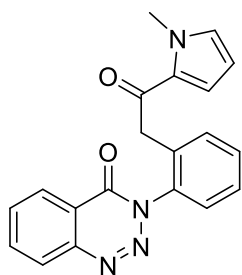

Following the above procedure 4, the product **4aj** was obtained in 51 % yield (35.1 mg, 0.102 mmol) as a yellow solid after column chromatography (eluent = Petroleum ether/EtOAc 4:1 v/v). Rf (Petroleum ether/EtOAc 4:1): 0.22. <sup>1</sup>H NMR (400 MHz, CDCl<sub>3</sub>) δ 8.36 (dd, *J* = 7.9, 1.0 Hz, 1H), 8.15 (d, *J* = 7.6 Hz, 1H), 7.95 (td, *J* = 8.2, 7.8, 1.4 Hz, 1H), 7.84 – 7.76 (m, 1H), 7.56 – 7.38 (m, 4H), 6.70 (dd, *J* = 4.1, 1.7 Hz, 1H), 6.58 (t, *J* = 1.8 Hz, 1H),

5.78 (dd,  $J = 4.1, 2.5$  Hz, 1H), 4.02 (s, 2H), 3.76 (s, 3H).  $^{13}\text{C}$  NMR (101 MHz,  $\text{CDCl}_3$ )  $\delta$  186.88, 155.58, 143.96, 137.95, 135.19, 134.28, 132.84, 132.18, 131.59, 130.30, 128.68, 128.57, 128.39, 125.61, 120.52, 120.03, 119.78, 108.01, 42.27, 37.79. ESI-MS: calculated  $\text{C}_{20}\text{H}_{17}\text{N}_4\text{O}_2$   $[\text{M}+\text{H}]^+$  345.1346; Found 345.1346.

### 3-(2-(2-oxo-2-(thiophen-2-yl)ethyl)phenyl)benzo[d][1,2,3]triazin-4(3H)-one (4ak)

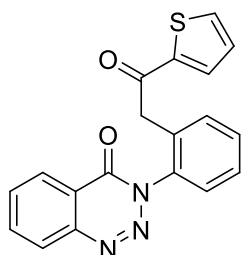

Following the above procedure 4, the product **4ak** was obtained in 37 % yield (25.6 mg, 0.074 mmol) as a yellow solid after column chromatography (eluent = Petroleum ether/EtOAc 4:1 v/v).  $R_f$  (Petroleum ether/EtOAc 4:1): 0.26.  $^1\text{H}$  NMR (400 MHz,  $\text{CDCl}_3$ )  $\delta$  8.38 (d,  $J = 7.8$  Hz, 1H), 8.18 (d,  $J = 8.1$  Hz, 1H), 7.97 (t,  $J = 7.7$  Hz, 1H), 7.83 (t,  $J = 7.6$  Hz, 1H), 7.62 – 7.38 (m, 6H), 6.91 (t,  $J = 3.9$  Hz, 1H), 4.15 (s, 2H).  $^{13}\text{C}$  NMR (101 MHz,  $\text{CDCl}_3$ )  $\delta$  189.28, 155.39, 143.82, 143.59, 137.86, 135.29, 134.32, 132.95, 132.85, 131.58, 130.25, 128.74, 128.62, 128.59, 128.40, 128.15, 125.66, 120.29, 42.43. ESI-MS: calculated  $\text{C}_{19}\text{H}_{14}\text{N}_3\text{O}_2\text{S}$   $[\text{M}+\text{H}]^+$  348.0801; Found 348.0801.

### 3-(2-(2-cyclopropyl-2-oxoethyl)phenyl)benzo[d][1,2,3]triazin-4(3H)-one (4al)

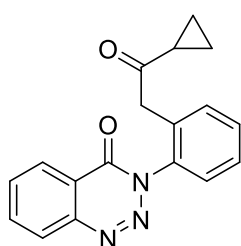

Following the above procedure 4, the product **4al** was obtained in 51 % yield (31.1 mg, 0.102 mmol) as a yellow solid after column chromatography (eluent = Petroleum ether/EtOAc 4:1 v/v).  $R_f$  (Petroleum ether/EtOAc 4:1): 0.21.  $^1\text{H}$  NMR (400 MHz,  $\text{CDCl}_3$ )  $\delta$  8.43 (dd,  $J = 7.9, 1.2$  Hz, 1H), 8.24 (d,  $J = 8.0$  Hz, 1H), 8.01 (td,  $J = 8.3, 7.8, 1.4$  Hz, 1H), 7.89 – 7.83 (m, 1H), 7.58 – 7.40 (m, 4H), 3.77 (s, 2H), 1.87 – 1.79 (m, 1H), 0.86 (p,  $J = 3.8, 3.3$  Hz, 2H), 0.73 (p,  $J = 7.5, 3.7$  Hz, 2H).  $^{13}\text{C}$  NMR (101 MHz,  $\text{CDCl}_3$ )  $\delta$  207.04, 155.27, 143.83, 138.03, 135.28, 132.94, 132.48, 131.79, 130.16, 128.70, 128.54, 128.46, 125.59, 120.30, 46.93, 20.09, 11.78. ESI-MS: calculated  $\text{C}_{18}\text{H}_{16}\text{N}_3\text{O}_2$   $[\text{M}+\text{H}]^+$  306.1237; Found 306.1229.

### 3-(2-(2-(adamantan-1-yl)-2-oxoethyl)phenyl)benzo[d][1,2,3]triazin-4(3H)-one (4am)

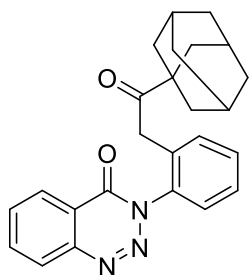

Following the above procedure 4, the product **4am** was obtained in 43 % yield (34.5 mg, 0.086 mmol) as a yellow solid after column chromatography (eluent = Petroleum ether/EtOAc 8:1 v/v). R<sub>f</sub> (Petroleum ether/EtOAc 8:1): 0.24. <sup>1</sup>H NMR (400 MHz, CDCl<sub>3</sub>) δ 8.44 (dd, *J* = 7.9, 1.0 Hz, 1H), 8.23 (d, *J* = 7.7 Hz, 1H), 8.00 (td, *J* = 8.2, 7.8, 1.4 Hz, 1H), 7.90 – 7.81 (m, 1H), 7.52 – 7.40 (m, 3H), 7.38 – 7.33 (m, 1H), 3.77 (s, 2H), 1.87 (s, 3H), 1.66 – 1.57 (m, 9H), 1.52 (d, *J* = 11.4 Hz, 3H). <sup>13</sup>C NMR (101 MHz, CDCl<sub>3</sub>) δ 210.80, 155.24, 143.86, 137.92, 135.33, 132.94, 132.77, 132.35, 129.85, 128.67, 128.33, 128.16, 125.65, 120.42, 46.73, 39.55, 38.75, 38.22, 36.44, 27.91. ESI-MS: calculated C<sub>25</sub>H<sub>26</sub>N<sub>3</sub>O<sub>2</sub> [M+H]<sup>+</sup> 400.2020; Found 400.2021.

### 3-(2-(3,3-dimethyl-2-oxobutyl)phenyl)benzo[d][1,2,3]triazin-4(3H)-one (4an)

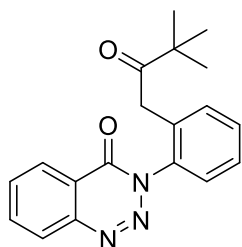

Following the above procedure 4, the product **4an** was obtained in 36 % yield (23.3 mg, 0.072 mmol) as a yellow solid after column chromatography (eluent = Petroleum ether/EtOAc 8:1 v/v). R<sub>f</sub> (Petroleum ether/EtOAc 8:1): 0.26. <sup>1</sup>H NMR (400 MHz, CDCl<sub>3</sub>) δ 8.43 (dd, *J* = 7.9, 1.1 Hz, 1H), 8.23 (d, *J* = 7.7 Hz, 1H), 8.01 (td, *J* = 8.2, 7.8, 1.4 Hz, 1H), 7.89 – 7.80 (m, 1H), 7.55 – 7.33 (m, 4H), 3.82 (s, 2H), 0.96 (s, 9H). <sup>13</sup>C NMR (101 MHz, CDCl<sub>3</sub>) δ 211.04, 155.16, 143.75, 137.85, 135.26, 132.89, 132.60, 132.16, 129.78, 128.63, 128.26, 128.14, 125.57, 120.26, 44.45, 39.82, 26.39. ESI-MS: calculated C<sub>19</sub>H<sub>20</sub>N<sub>3</sub>O<sub>2</sub> [M+H]<sup>+</sup> 322.1550; Found 322.1546.

### 3-(4-bromo-2-(2-oxo-2-phenylethyl)phenyl)benzo[d][1,2,3]triazin-4(3H)-one (4ba)

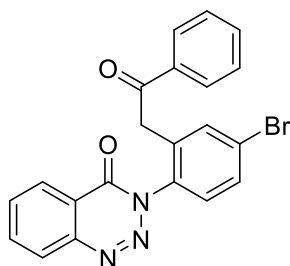

Following the above procedure 4, the product **4ba** was obtained in 53 % yield (44.8 mg, 0.106 mmol) as a yellow solid after column chromatography (eluent = Petroleum ether/EtOAc 4:1 v/v). R<sub>f</sub> (Petroleum ether/EtOAc 4:1): 0.24. <sup>1</sup>H NMR (400 MHz, CDCl<sub>3</sub>) δ 8.34 (d, *J* = 7.9 Hz, 1H), 8.14 (d, *J* = 8.1 Hz, 1H), 7.96 (t, *J* = 7.7 Hz,

1H), 7.79 (dd,  $J = 19.8, 7.8$  Hz, 3H), 7.61 (d,  $J = 9.6$  Hz, 2H), 7.43 (t,  $J = 7.4$  Hz, 1H), 7.36 – 7.18 (m, 3H), 4.22 (s, 2H).  $^{13}\text{C}$  NMR (101 MHz,  $\text{CDCl}_3$ )  $\delta$  195.68, 155.18, 143.65, 137.00, 136.13, 135.39, 135.04, 134.79, 133.45, 133.07, 131.57, 130.02, 128.78, 128.65, 128.36, 125.62, 124.00, 120.09, 41.29. ESI-MS: calculated  $\text{C}_{21}\text{H}_{15}\text{N}_3\text{O}_2\text{Br}$   $[\text{M}+\text{H}]^+$  420.0342; Found 420.0342.

### 3-(4-methoxy-2-(2-oxo-2-phenylethyl)phenyl)benzo[d][1,2,3]triazin-4(3H)-one (4ca)

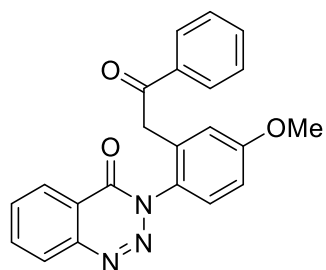

Following the above procedure 4, the product **4ca** was obtained in 32 % yield (24.1 mg, 0.064 mmol) as a yellow solid after column chromatography (eluent = Petroleum ether/EtOAc 4:1 v/v).  $R_f$  (Petroleum ether/EtOAc 4:1): 0.27.  $^1\text{H}$  NMR (400 MHz,  $\text{CDCl}_3$ )  $\delta$  8.36 (dd,  $J = 7.9, 1.2$  Hz, 1H), 8.15 (d,  $J = 8.1$  Hz, 1H), 7.99 – 7.91 (m, 1H), 7.84 – 7.75 (m, 3H), 7.42 (t,  $J = 7.4$  Hz, 1H), 7.35 (d,  $J = 8.3$  Hz, 1H), 7.29 (t,  $J = 7.8$  Hz, 2H), 7.02 – 6.94 (m, 2H), 4.18 (s, 2H), 3.84 (s, 3H).  $^{13}\text{C}$  NMR (101 MHz,  $\text{CDCl}_3$ )  $\delta$  196.50, 160.54, 155.60, 143.81, 136.35, 135.19, 134.30, 133.27, 132.84, 130.67, 129.62, 128.68, 128.60, 128.51, 125.66, 120.29, 116.91, 113.57, 55.71, 41.78. ESI-MS: calculated  $\text{C}_{22}\text{H}_{18}\text{N}_3\text{O}_3$   $[\text{M}+\text{H}]^+$  372.1343; Found 372.1338.

### 8-chloro-3-(2-(2-oxo-2-phenylethyl)phenyl)benzo[d][1,2,3]triazin-4(3H)-one (4da)

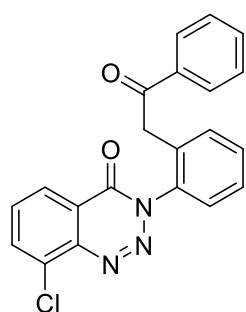

Following the above procedure 4, the product **4da** was obtained in 46 % yield (34.6 mg, 0.092 mmol) as a yellow solid after column chromatography (eluent = Petroleum ether/EtOAc 4:1 v/v).  $R_f$  (Petroleum ether/EtOAc 4:1): 0.20.  $^1\text{H}$  NMR (400 MHz,  $\text{CDCl}_3$ )  $\delta$  8.26 (dd,  $J = 7.9, 1.3$  Hz, 1H), 7.97 (dd,  $J = 7.9, 1.3$  Hz, 1H), 7.78 (dd,  $J = 8.3, 1.2$  Hz, 2H), 7.71 (t,  $J = 7.9$  Hz, 1H),  $\delta$  7.52 – 7.38 (m, 5H), 7.34 – 7.27 (m, 2H), 4.25 (s, 2H).  $^{13}\text{C}$  NMR (101 MHz,  $\text{CDCl}_3$ )  $\delta$  196.45, 154.43, 140.23, 137.61, 136.29, 135.88, 134.01, 133.28, 133.15, 133.07, 132.95, 131.88, 130.35, 128.57, 128.47, 128.45, 124.38, 122.08, 41.58.

ESI-MS: calculated  $C_{21}H_{15}N_3O_2Cl$   $[M+H]^+$  376.0847; Found 376.0849.

**8-methyl-3-(2-(2-oxo-2-phenylethyl)phenyl)benzo[d][1,2,3]triazin-4(3H)-one (4ea)**

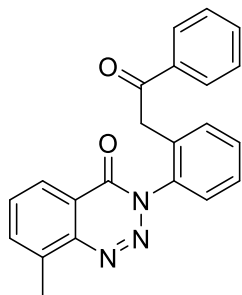

Following the above procedure 4, the product **4ea** was obtained in 41 % yield (29.1 mg, 0.082 mmol) as a yellow solid after column chromatography (eluent = Petroleum ether/EtOAc 8:1 v/v). R<sub>f</sub> (Petroleum ether/EtOAc 8:1): 0.25. <sup>1</sup>H NMR (400 MHz, CDCl<sub>3</sub>) δ 8.21 (d, *J* = 7.0 Hz, 1H), 7.83 – 7.78 (m, 2H), 7.78 – 7.73 (m, 1H), 7.68 (t, *J* = 7.6 Hz, 1H), 7.52 – 7.39 (m, 5H), 7.33 – 7.27 (m, 2H), 4.24 (s, 2H), 2.83 (s, 3H). <sup>13</sup>C NMR (101 MHz, CDCl<sub>3</sub>) δ 196.68, 155.67, 142.16, 138.48, 138.02, 136.44, 136.34, 133.18, 133.07, 132.65, 131.64, 130.34, 130.09, 128.54, 128.52, 128.40, 123.26, 120.38, 41.59, 17.35. ESI-MS: calculated  $C_{22}H_{18}N_3O_2$   $[M+H]^+$  356.1394; Found 356.1386.

**3-(6'-hydroxy-4',4'-dimethyl-2'-oxo-2',3',4',5'-tetrahydro-[1,1'-biphenyl]-2-yl)benzo[d][1,2,3]triazin-4(3H)-one (5aa)**

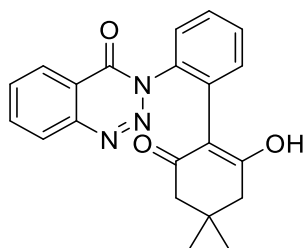

Following the above procedure 5, the product **5aa** was obtained in 81 % yield (58.5 mg, 0.162 mmol) as a yellow solid after column chromatography (eluent = Petroleum ether/EtOAc 1:1 v/v). R<sub>f</sub> (Petroleum ether/EtOAc 1:1): 0.20. <sup>1</sup>H NMR (400 MHz, CDCl<sub>3</sub>) δ 8.34 (d, *J* = 7.4 Hz, 1H), 8.18 (d, *J* = 8.1 Hz, 1H), 8.02 – 7.93 (m, 1H), 7.81 (t, *J* = 7.5 Hz, 1H), 7.60 – 7.52 (m, 3H), 7.39 – 7.32 (m, 1H), 2.55 – 1.88 (m, 4H), 1.02 (s, 3H), 0.72 (s, 3H). <sup>13</sup>C NMR (101 MHz, CDCl<sub>3</sub>) δ 195.69, 171.30, 155.71, 143.66, 138.86, 135.29, 133.06, 132.75, 130.28, 130.24, 129.61, 128.62, 128.49, 125.46, 119.87, 113.59, 50.32, 42.28, 31.46, 28.46, 27.57. ESI-MS: calculated  $C_{21}H_{20}N_3O_3$   $[M+H]^+$  362.1499; Found 362.1493.



**5,5-dimethyl-2-(2-methyl-6-(4-oxobenzo[*d*][1,2,3]triazin-3(4*H*)-yl)phenyl)cyclohexane-1,3-dione (5ba)**

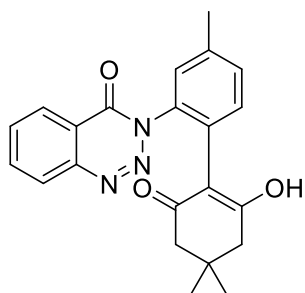

Following the above procedure 5, the product **5ba** was obtained in 82 % yield (61.4 mg, 0.164 mmol) as a yellow solid after column chromatography (eluent = Petroleum ether/EtOAc 1:1 v/v). R<sub>f</sub> (Petroleum ether/EtOAc 1:1): 0.27. <sup>1</sup>H NMR (400 MHz, CDCl<sub>3</sub>) δ 8.31 (d, *J* = 7.9 Hz, 1H), 8.13 (d, *J* = 8.1 Hz, 1H), 7.93 (t, *J* = 7.7 Hz, 1H), 7.77 (t, *J* = 7.6 Hz, 1H), 7.31 (d, *J* = 9.6 Hz, 2H), 7.20 (d, *J* = 7.7 Hz, 1H), 2.39 (s, 3H), 2.15 (d, *J* = 62.8 Hz, 4H), 0.98 (s, 3H), 0.70 (s, 3H). <sup>13</sup>C NMR (101 MHz, DMSO-*d*<sub>6</sub>) δ 154.11, 143.02, 137.91, 136.44, 135.41, 132.81, 132.77, 128.96, 128.91, 127.93, 127.88, 124.95, 120.08, 111.66, 30.94, 28.92, 26.61, 20.58. ESI-MS: calculated C<sub>22</sub>H<sub>22</sub>N<sub>3</sub>O<sub>3</sub> [M+H]<sup>+</sup> 376.1656; Found 376.1652.

**3-(5-bromo-6'-hydroxy-4',4'-dimethyl-2'-oxo-2',3',4',5'-tetrahydro-[1,1'-biphenyl]-2-yl)benzo[*d*][1,2,3]triazin-4(3*H*)-one (5ca)**

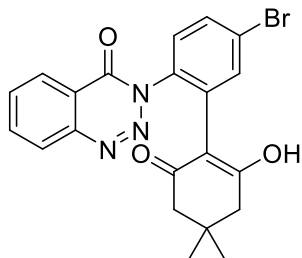

Following the above procedure 5, the product **5ca** was obtained in 68 % yield (60.2 mg, 0.136 mmol) as a yellow solid after column chromatography (eluent = Petroleum ether/EtOAc 1:1 v/v). R<sub>f</sub> (Petroleum ether/EtOAc 1:1): 0.23. <sup>1</sup>H NMR (600 MHz, CDCl<sub>3</sub>) δ 8.24 (d, *J* = 7.9 Hz, 1H), 8.06 (d, *J* = 8.1 Hz, 1H), 7.90 (t, *J* = 7.7 Hz, 1H), 7.74 (t, *J* = 7.6 Hz, 1H), 7.53 (d, *J* = 10.2 Hz, 1H), 7.44 (s, 1H), 7.34 (d, *J* = 8.4 Hz, 1H), 3.49 (s, 1H), 2.17 (s, 2H), 2.00 (d, *J* = 15.5 Hz, 2H), 0.93 (s, 3H), 0.70 (s, 3H). <sup>13</sup>C NMR (151 MHz, CDCl<sub>3</sub>) δ 145.76, 133.91, 127.71, 126.48, 125.84, 123.78, 123.29, 121.75, 119.66, 118.74, 115.86, 113.53, 110.50, 102.51, 21.82, 19.01, 17.88, 17.35. ESI-MS: calculated C<sub>21</sub>H<sub>19</sub>N<sub>3</sub>O<sub>3</sub>Br [M+H]<sup>+</sup> 440.0604; Found 440.0602.

**3-(6'-hydroxy-5-methoxy-4',4'-dimethyl-2'-oxo-2',3',4',5'-tetrahydro-[1,1'-biphenyl]-2-yl)benzo[d][1,2,3]triazin-4(3H)-one (5da)**

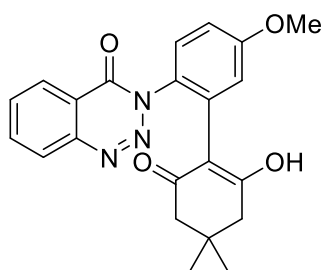

Following the above procedure 5, the product **5da** was obtained in 69 % yield (54.2 mg, 0.138 mmol) as a yellow solid after column chromatography (eluent = Petroleum ether/EtOAc 1:1 v/v). R<sub>f</sub> (Petroleum ether/EtOAc 1:1): 0.24. <sup>1</sup>H NMR (400 MHz, CDCl<sub>3</sub>) δ 8.33 (d, *J* = 7.9 Hz, 1H), 8.16 (d, *J* = 8.1 Hz, 1H), 7.96 (t, *J* = 7.7 Hz, 1H), 7.80 (t, *J* = 7.6 Hz, 1H), 7.44 (d, *J* = 8.7 Hz, 1H), 7.05 (dd, *J* = 8.6, 2.5 Hz, 1H), 6.84 (d, *J* = 2.7 Hz, 1H), 3.84 (s, 3H), 2.27 – 1.96 (m, 4H), 1.01 (s, 3H), 0.71 (s, 3H). <sup>13</sup>C NMR (101 MHz, DMSO-*d*<sub>6</sub>) δ 158.71, 154.29, 143.03, 135.34, 133.39, 132.69, 131.25, 128.67, 127.84, 124.96, 120.08, 117.87, 112.42, 111.80, 55.42, 46.24, 30.91, 28.97, 26.51. ESI-MS: calculated C<sub>22</sub>H<sub>22</sub>N<sub>3</sub>O<sub>4</sub> [M+H]<sup>+</sup> 392.1605; Found 392.1602.

**methyl 3-(6'-hydroxy-4',4'-dimethyl-2'-oxo-2',3',4',5'-tetrahydro-[1,1'-biphenyl]-2-yl)-4-oxo-3,4-dihydrobenzo[d][1,2,3]triazine-7-carboxylate (5ea)**

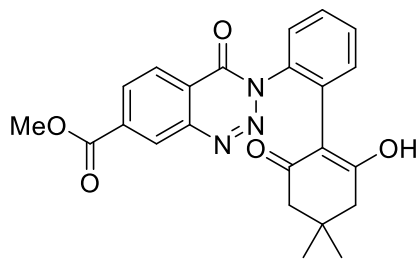

Following the above procedure 5, the product **5ea** was obtained in 77 % yield (64.8 mg, 0.154 mmol) as a yellow solid after column chromatography (eluent = Petroleum ether/EtOAc 1:1 v/v). R<sub>f</sub> (Petroleum ether/EtOAc 1:1): 0.21. <sup>1</sup>H NMR (400 MHz, CDCl<sub>3</sub>) δ 8.81 (s, 1H), 8.41 (s, 2H), 7.57 (s, 3H), 7.44 – 7.32 (m, 1H), 4.03 (s, 3H), 2.20 (d, *J* = 62.4 Hz, 4H), 1.02 (s, 3H), 0.74 (s, 3H). <sup>13</sup>C NMR (101 MHz, DMSO-*d*<sub>6</sub>) δ 195.71, 171.43, 165.16, 154.98, 143.53, 138.63, 136.45, 133.15, 132.66, 130.40, 130.29, 130.25, 129.56, 128.39, 126.11, 122.84, 113.49, 53.18, 50.38, 42.44, 31.53, 28.61, 27.65. ESI-MS: calculated C<sub>23</sub>H<sub>22</sub>N<sub>3</sub>O<sub>5</sub> [M+H]<sup>+</sup> 420.1554; Found 420.1552.

**6-bromo-3-(6'-hydroxy-4',4'-dimethyl-2'-oxo-2',3',4',5'-tetrahydro-[1,1'-biphenyl]-2-yl)benzo[d][1,2,3]triazin-4(3H)-one (5fa)**

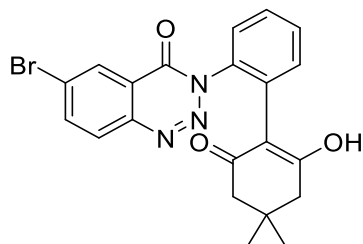

Following the above procedure 5, the product **5fa** was obtained in 77 % yield (68.1 mg, 0.154 mmol) as a yellow solid after column chromatography (eluent = Petroleum ether/EtOAc 1:1 v/v). R<sub>f</sub> (Petroleum ether/EtOAc 1:1): 0.26. <sup>1</sup>H NMR (400 MHz, CDCl<sub>3</sub>) δ 8.49 (s, 1H), 8.05 (s, 2H), 7.62 – 7.52 (m, 3H), 7.38 – 7.32 (m, 1H), 2.64 – 1.84 (m, 4H), 1.04 (s, 3H), 0.77 (s, 3H). <sup>13</sup>C NMR (101 MHz, CDCl<sub>3</sub>) δ 195.55, 171.14, 154.42, 142.29, 138.68, 138.66, 133.02, 130.53, 130.26, 130.00, 129.78, 128.49, 128.22, 127.45, 121.12, 113.53, 50.35, 42.24, 31.49, 28.38, 27.67. ESI-MS: calculated C<sub>21</sub>H<sub>19</sub>N<sub>3</sub>O<sub>3</sub>Br [M+H]<sup>+</sup> 440.0604; Found 440.0602.

**2-(2-(7-chloro-4-oxobenzo[d][1,2,3]triazin-3(4H)-yl)phenyl)-5,5-dimethylcyclohexane-1,3-dione (5ga)**

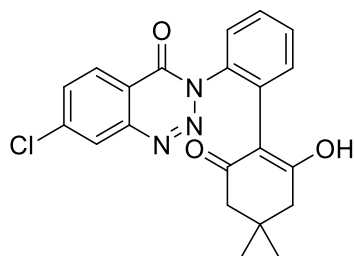

Following the above procedure 5, the product **5ga** was obtained in 94 % yield (74.6 mg, 0.188 mmol) as a yellow solid after column chromatography (eluent = Petroleum ether/EtOAc 1:1 v/v). R<sub>f</sub> (Petroleum ether/EtOAc 1:1): 0.22. <sup>1</sup>H NMR (400 MHz, CDCl<sub>3</sub>) δ 8.28 (d, *J* = 9.9 Hz, 1H), 8.14 (s, 1H), 7.75 (d, *J* = 8.5 Hz, 1H), 7.60 – 7.49 (m, 3H), 7.38 – 7.32 (m, 1H), 2.20 (dd, *J* = 71.3, 15.7 Hz, 4H), 1.03 (s, 3H), 0.76 (s, 3H). <sup>13</sup>C NMR (101 MHz, CDCl<sub>3</sub>) δ 154.94, 144.35, 141.69, 138.55, 133.30, 133.13, 130.35, 130.20, 129.50, 128.37, 128.00, 127.25, 118.45, 113.44, 31.53, 28.54, 27.68. ESI-MS: calculated C<sub>21</sub>H<sub>19</sub>N<sub>3</sub>O<sub>3</sub>Cl [M+H]<sup>+</sup> 396.1109; Found 396.1107.

**2-(2-(6-chloro-4-oxobenzo[d][1,2,3]triazin-3(4H)-yl)phenyl)-5,5-dimethylcyclohexane-1,3-dione (5ha)**

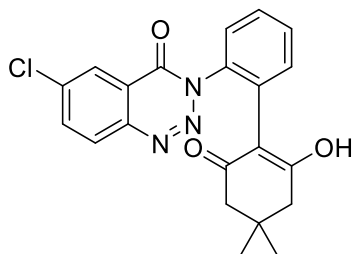

Following the above procedure 5, the product **5ha** was obtained in 79 % yield (62.4 mg, 0.158 mmol) as a yellow solid after column chromatography (eluent = Petroleum ether/EtOAc 1:1 v/v). R<sub>f</sub> (Petroleum ether/EtOAc 1:1): 0.23. <sup>1</sup>H NMR (400 MHz, CDCl<sub>3</sub>) δ 8.30 (d, *J* = 2.3 Hz, 1H), 8.12 (d, *J* = 8.7 Hz, 1H), 7.89 (dd, *J* = 8.7, 2.3 Hz, 1H), 7.60 – 7.50 (m, 3H), 7.38 – 7.31 (m, 1H), 2.19 (d, *J* = 18.4 Hz, 4H), 1.03 (s, 3H), 0.76 (s, 3H). <sup>13</sup>C NMR (101 MHz, CDCl<sub>3</sub>) δ 154.62, 142.06, 139.21, 138.67, 135.88, 133.12, 130.49, 130.35, 130.15, 129.70, 128.49, 125.10, 121.16, 113.55, 31.56, 28.48, 27.72. ESI-MS: calculated C<sub>21</sub>H<sub>19</sub>N<sub>3</sub>O<sub>3</sub>Cl [M+H]<sup>+</sup> 396.1109; Found 396.1106.

**8-chloro-3-(6'-hydroxy-4',4'-dimethyl-2'-oxo-2',3',4',5'-tetrahydro-[1,1'-biphenyl]-2-yl)benzo[d][1,2,3]triazin-4(3H)-one (5ia)**

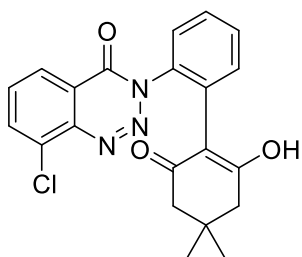

Following the above procedure 5, the product **5ia** was obtained in 67 % yield (52.8 mg, 0.134 mmol) as a yellow solid after column chromatography (eluent = Petroleum ether/EtOAc 1:1 v/v). R<sub>f</sub> (Petroleum ether/EtOAc 1:1): 0.26. <sup>1</sup>H NMR (400 MHz, CDCl<sub>3</sub>) δ 8.26 (d, *J* = 7.9 Hz, 1H), 7.99 (d, *J* = 7.9 Hz, 1H), 7.75 – 7.68 (m, 1H), 7.55 (s, 3H), 7.39 – 7.31 (m, 1H), 2.58 – 1.92 (m, 4H), 1.04 (s, 3H), 0.78 (s, 3H). <sup>13</sup>C NMR (101 MHz, CDCl<sub>3</sub>) δ 195.63, 171.39, 154.75, 140.18, 138.70, 135.97, 133.98, 133.13, 132.97, 130.51, 130.04, 129.65, 128.47, 124.37, 121.88, 113.58, 50.42, 42.36, 31.59, 28.57, 27.74. ESI-MS: calculated C<sub>21</sub>H<sub>19</sub>N<sub>3</sub>O<sub>3</sub>Cl [M+H]<sup>+</sup> 396.1109; Found 396.1109.

**3-(6'-hydroxy-4',4'-dimethyl-2'-oxo-2',3',4',5'-tetrahydro-[1,1'-biphenyl]-2-yl)-8-methylbenzo[d][1,2,3]triazin-4(3H)-one (5ja)**

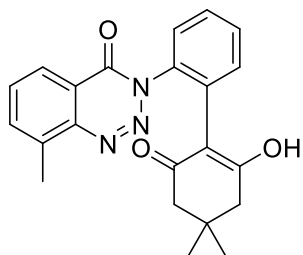

Following the above procedure 5, the product **5ja** was obtained in 70 % yield (52.8 mg, 0.140 mmol) as a yellow solid after column chromatography (eluent = Petroleum ether/EtOAc 1:1 v/v). R<sub>f</sub> (Petroleum ether/EtOAc 1:1): 0.24. <sup>1</sup>H NMR (400 MHz, CDCl<sub>3</sub>) δ 8.14 (d, *J* = 7.7 Hz, 1H), 7.75 (d, *J* = 7.2 Hz, 1H), 7.66 (t, *J* = 7.6 Hz, 1H), 7.56 – 7.43 (m, 3H), 7.36 – 7.30 (m, 1H), 2.83 (s, 3H), 2.37 (d, *J* = 15.7 Hz, 1H), 2.17 (dd, *J* = 16.8, 7.9 Hz, 2H), 2.00 (d, *J* = 16.1 Hz, 1H), 1.00 (s, 3H), 0.73 (s, 3H). <sup>13</sup>C NMR (101 MHz, CDCl<sub>3</sub>) δ 195.94, 171.63, 155.99, 142.01, 138.92, 138.35, 136.34, 133.03, 132.44, 130.47, 130.02, 129.32, 128.33, 123.05, 119.97, 113.62, 50.34, 42.44, 31.48, 28.59, 27.51, 17.29. ESI-MS: calculated C<sub>22</sub>H<sub>22</sub>N<sub>3</sub>O<sub>3</sub> [M+H]<sup>+</sup> 376.1656; Found 376.1653.

**4-(2-(4-oxobenzo[d][1,2,3]triazin-3(4H)-yl)phenyl)-2H-pyran-3,5(4H,6H)-dione (5ab)**

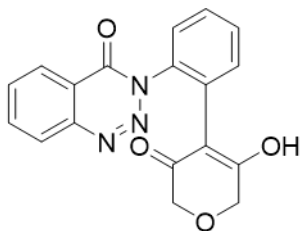

Following the above procedure 5, the product **5ab** was obtained in 84 % yield (56.3 mg, 0.168 mmol) as a yellow solid after column chromatography (eluent = Dichloromethane/Methanol 20:1 v/v). R<sub>f</sub> (Dichloromethane/Methanol 20:1): 0.23. <sup>1</sup>H NMR (400 MHz, DMSO-*d*<sub>6</sub>) δ 8.25 (d, *J* = 7.8 Hz, 1H), 8.15 (d, *J* = 8.6 Hz, 1H), 8.05 (t, *J* = 7.7 Hz, 1H), 7.89 (t, *J* = 7.8 Hz, 1H), 7.50 (d, *J* = 7.6 Hz, 1H), 7.46 – 7.29 (m, 3H), 3.81 (s, 4H). <sup>13</sup>C NMR (101 MHz, DMSO-*d*<sub>6</sub>) δ 154.19, 142.95, 137.89, 135.44, 132.87, 132.86, 129.90, 128.31, 128.00, 127.74, 127.32, 124.98, 120.07, 110.21, 68.03. ESI-MS: calculated C<sub>18</sub>H<sub>14</sub>N<sub>3</sub>O<sub>4</sub> [M+H]<sup>+</sup> 336.0979; Found 336.0974.

**3-(6'-hydroxy-2'-oxo-2',3',4',5'-tetrahydro-[1,1'-biphenyl]-2-yl)benzo[*d*][1,2,3]triazin-4(3*H*)-one (5ac)**

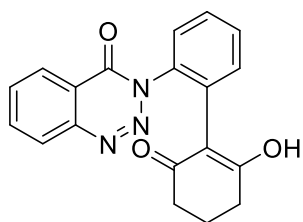

Following the above procedure 5, the product **5ac** was obtained in 85 % yield (56.9 mg, 0.170 mmol) as a yellow solid after column chromatography (eluent = Petroleum ether/EtOAc 1:3 v/v). R<sub>f</sub> (Petroleum ether/EtOAc 1:3): 0.24. <sup>1</sup>H NMR (400 MHz, CDCl<sub>3</sub>) δ 8.35 (d, 1H), 8.18 (d, *J* = 8.0 Hz, 1H), 8.02 – 7.95 (m, 1H), 7.87 – 7.79 (m, 1H), 7.55 (d, *J* = 3.1 Hz, 3H), 7.38 – 7.32 (m, 1H), 4.59 (s, 1H), 2.49 – 2.32 (m, 2H), 2.28 – 2.09 (m, 2H), 1.97 – 1.81 (m, 1H), 1.79 – 1.65 (m, 1H). <sup>13</sup>C NMR (101 MHz, CDCl<sub>3</sub>) δ 155.74, 143.68, 138.78, 135.41, 133.11, 132.91, 130.28, 130.17, 129.62, 128.71, 128.42, 125.53, 119.85, 114.78, 32.61, 32.56, 20.42. ESI-MS: calculated C<sub>19</sub>H<sub>16</sub>N<sub>3</sub>O<sub>3</sub> [M+H]<sup>+</sup> 334.1186; Found 334.1176.

**3-(2-(2-hydroxy-5-oxocyclopent-1-en-1-yl)phenyl)benzo[*d*][1,2,3]triazin-4(3*H*)-one (5ad)**

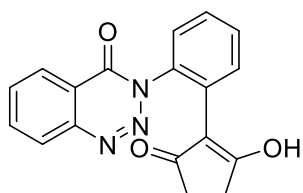

Following the above procedure 5, the product **5ad** was obtained in 99 % yield (63.2 mg, 0.198 mmol) as a yellow solid after column chromatography (eluent = Dichloromethane/Methanol 20:1 v/v). R<sub>f</sub> (Dichloromethane/Methanol 20:1): 0.21. <sup>1</sup>H NMR (400 MHz, DMSO-*d*<sub>6</sub>) δ 8.28 – 8.24 (dd, 1H), 8.14 (d, *J* = 7.7 Hz, 1H), 8.04 (td, *J* = 8.2, 7.8, 1.4 Hz, 1H), 7.91 – 7.86 (m, 1H), 7.60 (dd, *J* = 7.8, 1.2 Hz, 1H), 7.48 (dd, *J* = 7.8, 1.2 Hz, 1H), 7.43 (td, *J* = 7.6, 1.4 Hz, 1H), 7.34 (td, *J* = 7.6, 1.5 Hz, 1H), 3.67 (s, 1H), 2.03 (s, 4H). <sup>13</sup>C NMR (101 MHz, DMSO-*d*<sub>6</sub>) δ 154.55, 142.99, 136.75, 135.31, 132.76, 131.32, 129.28, 128.44, 128.13, 128.01, 127.07, 124.88, 120.41, 113.26, 30.34, 26.38. ESI-MS: calculated C<sub>18</sub>H<sub>14</sub>N<sub>3</sub>O<sub>3</sub> [M+H]<sup>+</sup> 320.1030; Found 320.1027.

### 2-(2-(4,4-dimethyl-2,6-dioxocyclohexylidene)hydrazineyl)-*N*-phenylbenzamide (6aa)

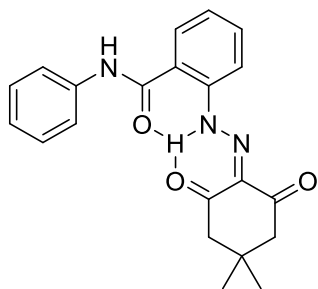

Following the above procedure 6, the product **6aa** was obtained in 83 % yield (60.3 mg, 0.166 mmol) as a yellow solid after column chromatography (eluent = Petroleum ether/EtOAc 2:1 v/v). R<sub>f</sub> (Petroleum ether/EtOAc 2:1): 0.27. <sup>1</sup>H NMR (400 MHz, DMSO-*d*<sub>6</sub>) δ 15.57 (s, 1H), 10.58 (s, 1H), 8.00 (d, *J* = 8.2 Hz, 1H), 7.92 (d, *J* = 7.0 Hz, 1H), 7.76 (d, *J* = 7.7 Hz, 2H), 7.69 (t, *J* = 7.7 Hz, 1H), 7.43 – 7.34 (m, 3H), 7.16 (t, *J* = 7.4 Hz, 1H), 2.60 (d, *J* = 17.7 Hz, 4H), 1.02 (s, 6H). <sup>13</sup>C NMR (101 MHz, DMSO-*d*<sub>6</sub>) δ 196.05, 193.11, 165.68, 141.54, 138.60, 132.85, 131.19, 129.06, 128.72, 125.22, 124.27, 122.57, 120.78, 116.50, 52.13, 51.80, 30.17, 28.04. ESI-MS: calculated C<sub>21</sub>H<sub>22</sub>N<sub>3</sub>O<sub>3</sub> [M+H]<sup>+</sup> 364.1656; Found 364.1647.

### 2-(2-(2,6-dioxocyclohexylidene)hydrazineyl)-*N*-phenylbenzamide (6ab)

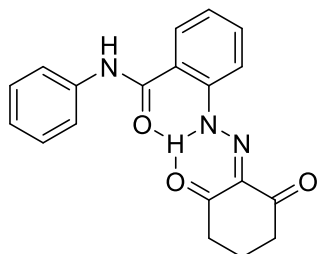

Following the above procedure 6, the product **6ab** was obtained in 83 % yield (55.8 mg, 0.166 mmol) as a yellow solid after column chromatography (eluent = Petroleum ether/EtOAc 2:1 v/v). R<sub>f</sub> (Petroleum ether/EtOAc 2:1): 0.28. <sup>1</sup>H NMR (400 MHz, DMSO-*d*<sub>6</sub>) δ 15.53 (s, 1H), 10.58 (s, 1H), 7.98 (d, *J* = 8.1 Hz, 1H), 7.91 (dd, *J* = 7.8, 1.1 Hz, 1H), 7.76 (d, *J* = 7.6 Hz, 2H), 7.73 – 7.66 (m, 1H), 7.44 – 7.33 (m, 3H), 7.15 (t, *J* = 7.4 Hz, 1H), 2.66 (t, *J* = 6.3 Hz, 2H), 2.63 – 2.59 (t, 2H), 2.01 – 1.91 (m, 2H). <sup>13</sup>C NMR (101 MHz, DMSO-*d*<sub>6</sub>) δ 196.76, 193.63, 165.68, 141.57, 138.63, 132.85, 132.51, 129.04, 128.74, 125.15, 124.27, 122.65, 120.75, 116.49, 38.79, 38.62, 17.69. ESI-MS: calculated C<sub>19</sub>H<sub>18</sub>N<sub>3</sub>O<sub>3</sub> [M+H]<sup>+</sup> 336.1343; Found 336.1347.

### 2-(2-(3,5-dioxotetrahydro-4H-pyran-4-ylidene)hydrazineyl)-N-phenylbenzamide (6ac)

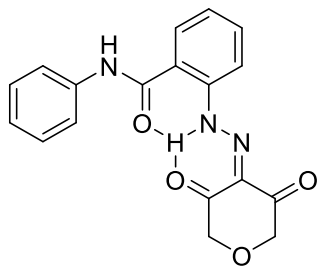

Following the above procedure 6, the product **6ac** was obtained in 39 % yield (26.3 mg, 0.078 mmol) as a yellow solid after column chromatography (eluent = Petroleum ether/EtOAc 2:1 v/v). R<sub>f</sub> (Petroleum ether/EtOAc 2:1): 0.23. <sup>1</sup>H NMR (400 MHz, DMSO-*d*<sub>6</sub>) δ 15.45 (s, 1H), 10.62 (s, 1H), 7.99 (dd, *J* = 15.1, 8.1 Hz, 2H), 7.76 (d, *J* = 8.2 Hz, 2H), 7.71 (d, *J* = 7.9 Hz, 1H), 7.45 (d, *J* = 7.6 Hz, 1H), 7.40 (t, *J* = 7.8 Hz, 2H), 7.16 (t, *J* = 7.2 Hz, 1H), 4.37 (d, *J* = 13.9 Hz, 4H). <sup>13</sup>C NMR (101 MHz, DMSO-*d*<sub>6</sub>) δ 192.91, 191.13, 165.65, 141.28, 138.52, 133.05, 130.62, 129.14, 128.76, 125.92, 124.38, 122.68, 120.89, 116.71, 73.21, 72.45. ESI-MS: calculated C<sub>18</sub>H<sub>15</sub>N<sub>3</sub>O<sub>4</sub>Na [M+Na]<sup>+</sup> 360.0955; Found 360.0958.

### 2-(2-(2,6-dioxocyclohexylidene)hydrazineyl)-5-methyl-N-phenylbenzamide (6bb)

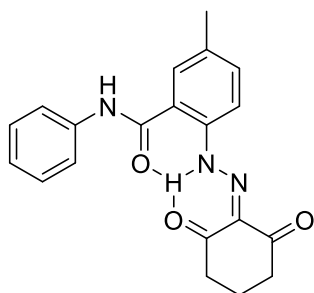

Following the above procedure 6, the product **6bb** was obtained in 96 % yield (67.1 mg, 0.192 mmol) as a yellow solid after column chromatography (eluent = Petroleum ether/EtOAc 2:1 v/v). R<sub>f</sub> (Petroleum ether/EtOAc 2:1): 0.20. <sup>1</sup>H NMR (400 MHz, DMSO-*d*<sub>6</sub>) δ 15.53 (s, 1H), 10.48 (s, 1H), 7.98 (d, *J* = 8.1 Hz, 1H), 7.92 – 7.86 (m, 1H), 7.70 – 7.64 (m, 1H), 7.59 (s, 1H), 7.56 (d, *J* = 8.2 Hz, 1H), 7.41 – 7.33 (m, 1H), 7.27 (t, *J* = 7.8 Hz, 1H), 6.97 (d, *J* = 7.2 Hz, 1H), 2.77 – 2.54 (m, 4H), 2.33 (s, 3H), 2.05 – 1.84 (m, 2H). <sup>13</sup>C NMR (101 MHz, DMSO-*d*<sub>6</sub>) δ 196.31, 193.25, 165.25, 141.21, 138.18, 137.52, 132.40, 132.11, 128.64, 128.19, 124.76, 124.59, 122.30, 120.89, 117.61, 116.15, 38.41, 38.24, 20.91, 17.34. ESI-MS: calculated C<sub>20</sub>H<sub>19</sub>N<sub>3</sub>O<sub>3</sub>Na [M+Na]<sup>+</sup> 372.1324; Found 372.1322.



### 2-(2-(2,6-dioxocyclohexylidene)hydrazineyl)-4-methoxy-*N*-phenylbenzamide (**6cb**)

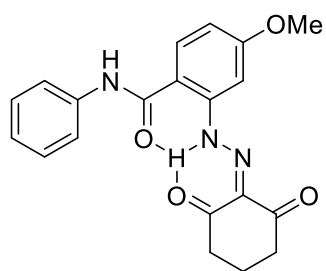

Following the above procedure 6, the product **6cb** was obtained in 78 % yield (57.2 mg, 0.156 mmol) as a yellow solid after column chromatography (eluent = Dichloromethane/Methanol 80:1 v/v). R<sub>f</sub> (Dichloromethane/Methanol 80:1): 0.23. <sup>1</sup>H NMR (400 MHz, DMSO-*d*<sub>6</sub>) δ 15.55 (s, 1H), 10.44 (s, 1H), 7.98 (d, *J* = 8.0 Hz, 1H), 7.92 – 7.87 (m, 1H), 7.71 – 7.64 (m, 3H), 7.39 – 7.34 (m, 1H), 6.99 – 6.94 (m, 2H), 3.76 (s, 3H), 2.70 – 2.57 (m, 4H), 2.01 – 1.89 (m, 2H). <sup>13</sup>C NMR (101 MHz, DMSO-*d*<sub>6</sub>) δ 196.24, 193.23, 164.86, 155.59, 141.18, 132.28, 132.08, 131.24, 128.48, 124.75, 122.31, 121.99, 116.10, 113.47, 54.88, 38.41, 38.24, 17.33. ESI-MS: calculated C<sub>20</sub>H<sub>19</sub>N<sub>3</sub>O<sub>4</sub>Na [M+Na]<sup>+</sup> 388.1273; Found 388.1274.

### *N*-(4-chlorophenyl)-2-(2-(2,6-dioxocyclohexylidene)hydrazineyl)benzamide (**6db**)

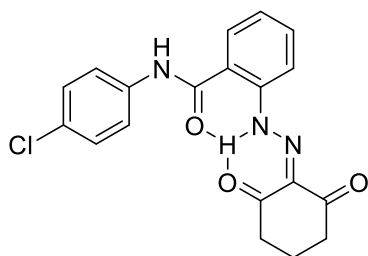

Following the above procedure 6, the product **6db** was obtained in 45 % yield (33.3 mg, 0.090 mmol) as a yellow solid after column chromatography (eluent = Dichloromethane/Methanol 80:1 v/v). R<sub>f</sub> (Dichloromethane/Methanol 80:1): 0.21. <sup>1</sup>H NMR (400 MHz, DMSO-*d*<sub>6</sub>) δ 15.42 (s, 1H), 10.59 (s, 1H), 7.96 (d, *J* = 8.5 Hz, 1H), 7.91 (d, *J* = 2.1 Hz, 1H), 7.74 (d, *J* = 7.7 Hz, 2H), 7.47 – 7.35 (m, 3H), 7.16 (t, *J* = 7.4 Hz, 1H), 2.74 – 2.54 (m, 4H), 2.05 – 1.89 (m, 2H). <sup>13</sup>C NMR (101 MHz, DMSO-*d*<sub>6</sub>) δ 196.62, 193.36, 164.51, 142.93, 138.06, 137.11, 132.66, 130.65, 128.38, 124.03, 123.98, 120.49, 120.27, 115.32, 38.44, 38.34, 17.14. ESI-MS: calculated C<sub>19</sub>H<sub>16</sub>N<sub>3</sub>O<sub>3</sub>NaCl [M+Na]<sup>+</sup> 392.0778; Found 392.0771.

**2-(2-(2,6-dioxocyclohexylidene)hydrazineyl)-N-(4-(trifluoromethyl)phenyl)benzamide (6eb)**

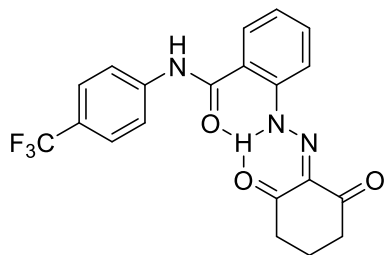

Following the above procedure 6, the product **6eb** was obtained in 74 % yield (59.7 mg, 0.148 mmol) as a yellow solid after column chromatography (eluent = Dichloromethane/Methanol 80:1 v/v). Rf (Dichloromethane/Methanol 80:1): 0.24. <sup>1</sup>H NMR (400 MHz,

DMSO-*d*<sub>6</sub>) δ 15.40 (s, 1H), 10.75 (s, 1H), 8.18 – 8.15 (m, 1H), 8.12 (d, *J* = 8.1 Hz, 1H), 7.76 (d, *J* = 7.6 Hz, 2H), 7.74 – 7.70 (m, 1H), 7.41 (t, *J* = 7.9 Hz, 2H), 7.18 (t, *J* = 7.4 Hz, 1H), 2.72 – 2.60 (m, 4H), 2.01 – 1.92 (m, 2H). <sup>13</sup>C NMR (101 MHz, DMSO-*d*<sub>6</sub>) δ 196.95, 193.38, 164.24, 141.99, 137.97, 132.10 (d, *J* = 32.3 Hz), 131.56 (d, *J* = 269.0 Hz), 128.45, 125.18, 124.51, 124.22, 121.80, 120.44, 112.18, 38.46, 38.38, 17.11. <sup>19</sup>F NMR (376 MHz, DMSO-*d*<sub>6</sub>) δ -61.92. ESI-MS: calculated C<sub>20</sub>H<sub>16</sub>N<sub>3</sub>O<sub>3</sub>F<sub>3</sub>Na [M+Na]<sup>+</sup> 426.1041; Found 426.1044.

**2-(2-(2,6-dioxocyclohexylidene)hydrazineyl)-N-(3-methoxyphenyl)benzamide (6fb)**

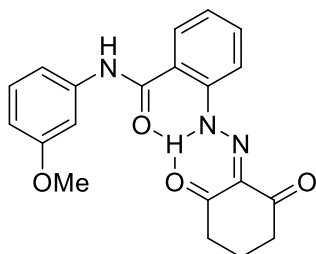

Following the above procedure 6, the product **6fb** was obtained in 87 % yield (63.6 mg, 0.174 mmol) as a yellow solid after column chromatography (eluent = Dichloromethane/Methanol 80:1 v/v). Rf (Dichloromethane/Methanol 80:1): 0.23. <sup>1</sup>H NMR (400 MHz,

DMSO-*d*<sub>6</sub>) δ 15.63 (s, 1H), 10.60 (s, 1H), 7.90 (d, *J* = 9.1 Hz, 1H), 7.75 (d, *J* = 7.9 Hz, 2H), 7.44 (d, *J* = 2.7 Hz, 1H), 7.39 (t, *J* = 7.8 Hz, 2H), 7.30 (dd, *J* = 9.1, 2.7 Hz, 1H), 7.16 (t, *J* = 7.3 Hz, 1H), 3.88 (s, 3H), 2.67 – 2.54 (m, 4H), 1.98 – 1.89 (m, 2H). <sup>13</sup>C NMR (101 MHz, DMSO-*d*<sub>6</sub>) δ 196.00, 193.18, 164.93, 156.50, 138.15, 134.40, 131.41, 128.38, 124.03, 123.74, 120.58, 118.54, 118.11, 113.24, 55.52, 38.36, 38.08, 17.58. ESI-MS: calculated C<sub>20</sub>H<sub>19</sub>N<sub>3</sub>O<sub>4</sub>Na [M+Na]<sup>+</sup> 388.1273; Found 388.1277.

### 2-(2-(2,6-dioxocyclohexylidene)hydrazineyl)-N-(m-tolyl)benzamide (6gb)

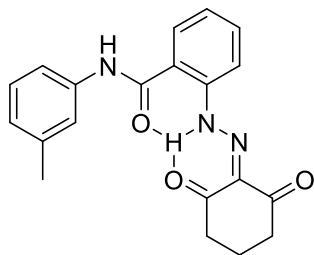

Following the above procedure 6, the product **6gb** was obtained in 94 % yield (65.7 mg, 0.188 mmol) as a yellow solid after column chromatography (eluent = Dichloromethane/Methanol 80:1 v/v). Rf (Dichloromethane/Methanol 80:1): 0.20. <sup>1</sup>H NMR (400 MHz, DMSO-*d*<sub>6</sub>) δ 15.16 (s, 1H), 10.46 (s, 1H), 7.68 (d, *J* = 7.8 Hz, 2H), 7.57 (d, *J* = 7.4 Hz, 1H), 7.49 (d, *J* = 7.4 Hz, 1H), 7.38 – 7.30 (m, 3H), 7.10 (t, *J* = 7.4 Hz, 1H), 2.63 (t, *J* = 6.3 Hz, 2H), 2.54 – 2.49 (m, 2H), 2.48 (s, 3H), 1.93 – 1.82 (m, 2H). <sup>13</sup>C NMR (101 MHz, DMSO-*d*<sub>6</sub>) δ 196.61, 192.58, 165.42, 138.48, 137.66, 133.95, 131.82, 130.50, 128.46, 128.23, 126.49, 125.88, 123.48, 119.90, 38.16, 38.08, 19.30, 17.46. ESI-MS: calculated C<sub>20</sub>H<sub>19</sub>N<sub>3</sub>O<sub>3</sub>Na [M+Na]<sup>+</sup> 372.1324; Found 372.1327.

### N-(3-chlorophenyl)-2-(2-(2,6-dioxocyclohexylidene)hydrazineyl)benzamide (6hb)

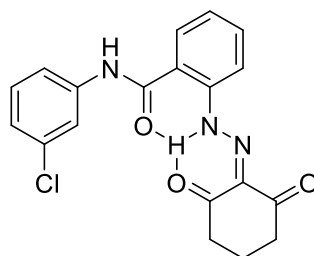

Following the above procedure 6, the product **6hb** was obtained in 78 % yield (57.7 mg, 0.156 mmol) as a yellow solid after column chromatography (eluent = Petroleum ether/EtOAc 4:1 v/v). Rf (Petroleum ether/EtOAc 4:1): 0.27. <sup>1</sup>H NMR (400 MHz, DMSO-*d*<sub>6</sub>) δ 15.44 (s, 1H), 10.62 (s, 1H), 7.99 (d, *J* = 2.3 Hz, 1H), 7.95 (d, *J* = 9.0 Hz, 1H), 7.78 – 7.71 (m, 3H), 7.40 (t, *J* = 7.9 Hz, 2H), 7.17 (t, *J* = 7.4 Hz, 1H), 2.70 – 2.58 (m, 4H), 2.02 – 1.88 (m, 2H). <sup>13</sup>C NMR (101 MHz, DMSO-*d*<sub>6</sub>) δ 196.51, 193.25, 163.98, 140.27, 138.01, 132.36, 132.28, 128.63, 128.38, 128.22, 124.09, 123.17, 120.47, 117.94, 38.41, 38.28, 17.24. ESI-MS: calculated C<sub>19</sub>H<sub>16</sub>N<sub>3</sub>O<sub>3</sub>NaCl [M+Na]<sup>+</sup> 392.0778; Found 392.0782.

**4-bromo-2-(2-(2,6-dioxocyclohexylidene)hydrazineyl)-N-phenylbenzamide (6ib)**

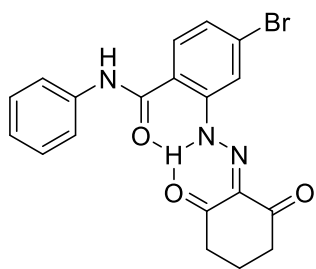

Following the above procedure 6, the product **6ib** was obtained in 70 % yield (58.0 mg, 0.140 mmol) as a yellow solid after column chromatography (eluent = Dichloromethane/Methanol 80:1 v/v). Rf (Dichloromethane/Methanol 80:1): 0.25. <sup>1</sup>H NMR (400 MHz, DMSO-*d*<sub>6</sub>) δ 15.51 (s, 1H), 10.67 (s, 1H), 7.98 (d, *J* = 8.3 Hz, 1H), 7.92 – 7.88 (m, 1H), 7.75 (d, *J* = 8.9 Hz, 2H), 7.69 (t, *J* = 7.7 Hz, 1H), 7.58 (d, *J* = 8.8 Hz, 2H), 7.40 – 7.35 (m, 1H), 2.70 – 2.58 (m, 4H), 2.00 – 1.92 (m, 2H). <sup>13</sup>C NMR (101 MHz, DMSO-*d*<sub>6</sub>) δ 196.46, 193.32, 165.43, 141.26, 137.70, 132.67, 132.20, 131.25, 128.71, 124.80, 122.27, 121.97, 116.20, 115.69, 38.44, 38.27, 17.35. ESI-MS: calculated C<sub>19</sub>H<sub>16</sub>N<sub>3</sub>O<sub>3</sub>NaBr [M+Na]<sup>+</sup> 436.0273; Found 436.0271.

**N-(3-bromophenyl)-2-(2-(2,6-dioxocyclohexylidene)hydrazineyl)benzamide (6jb)**

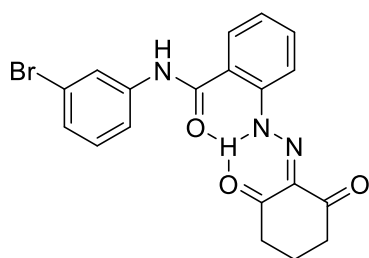

Following the above procedure 6, the product **6jb** was obtained in 83 % yield (68.7 mg, 0.166 mmol) as a yellow solid after column chromatography (eluent = Petroleum ether/EtOAc 4:1 v/v). Rf (Petroleum ether/EtOAc 4:1): 0.23. <sup>1</sup>H NMR (400 MHz, DMSO-*d*<sub>6</sub>) δ 15.43 (s, 1H), 10.63 (s, 1H), 8.10 (d, *J* = 1.9 Hz, 1H), 7.92 – 7.84 (m, 2H), 7.75 (d, *J* = 7.7 Hz, 2H), 7.40 (t, *J* = 7.9 Hz, 2H), 7.17 (t, *J* = 7.4 Hz, 1H), 2.74 – 2.55 (m, 4H), 2.03 – 1.90 (m, 2H). <sup>13</sup>C NMR (101 MHz, DMSO-*d*<sub>6</sub>) δ 196.59, 193.29, 163.92, 140.66, 138.02, 135.18, 132.42, 131.00, 128.40, 124.11, 123.50, 120.49, 118.17, 116.77, 38.42, 38.30, 17.23. ESI-MS: calculated C<sub>19</sub>H<sub>16</sub>N<sub>3</sub>O<sub>3</sub>NaBr [M+Na]<sup>+</sup> 436.0273; Found 436.0269.

## 8. NMR Spectra for New Compounds

<sup>1</sup>H NMR (400 MHz, CDCl<sub>3</sub>) Spectra of **4aa**

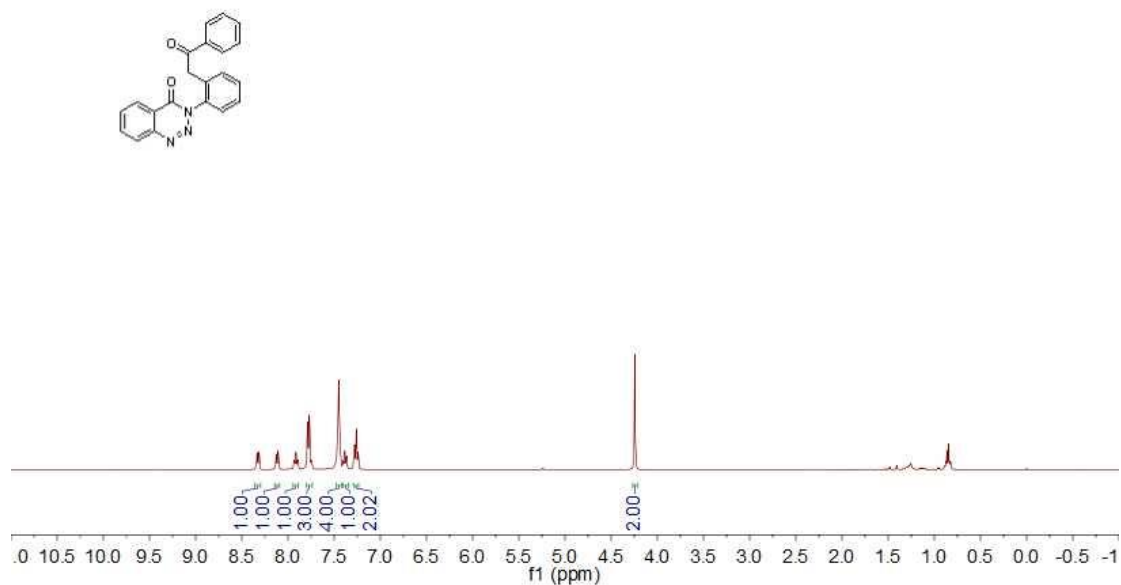

<sup>13</sup>C NMR (101 MHz, CDCl<sub>3</sub>) Spectra of **4aa**

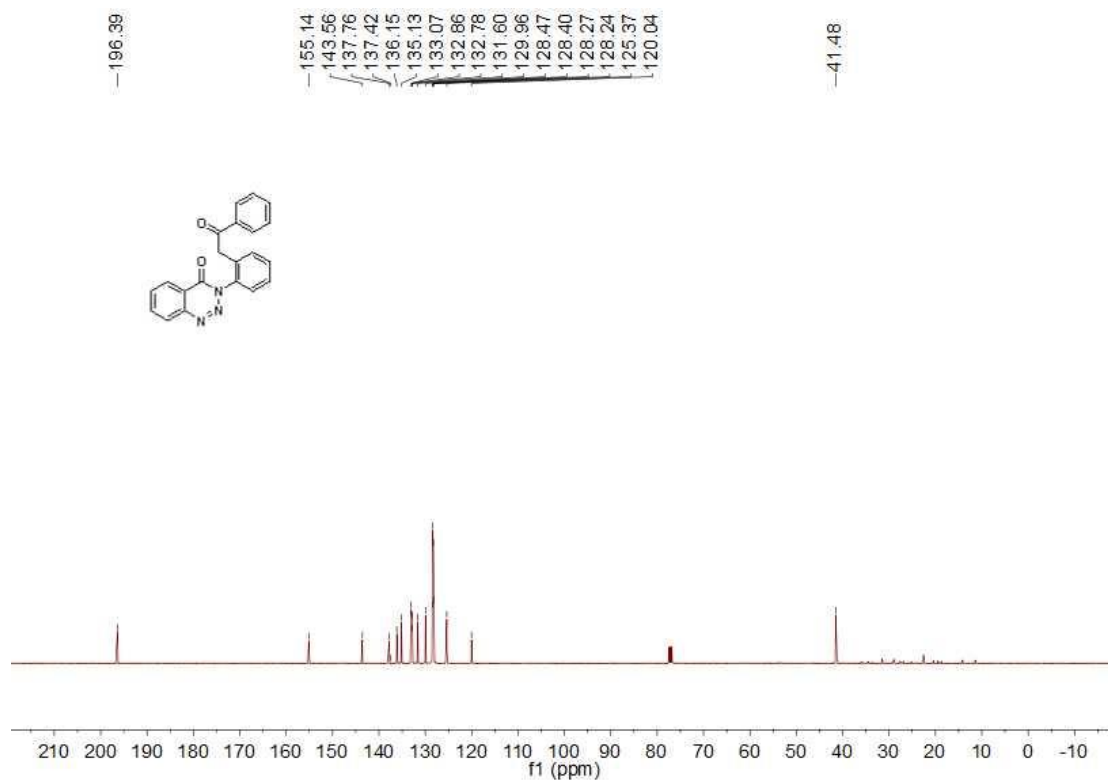

<sup>1</sup>H NMR (400 MHz, CDCl<sub>3</sub>) Spectra of **4ab**

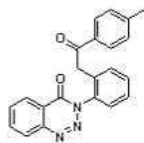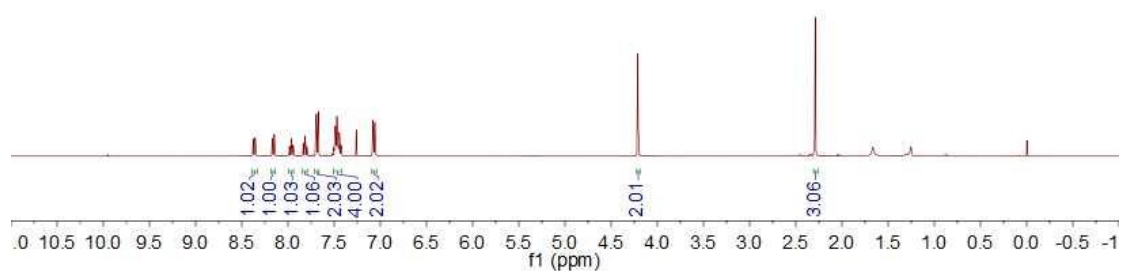

<sup>13</sup>C NMR (101 MHz, CDCl<sub>3</sub>) Spectra of **4ab**

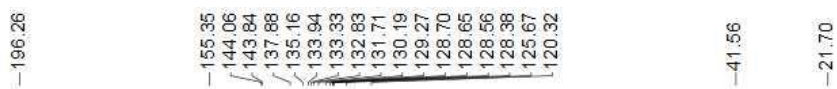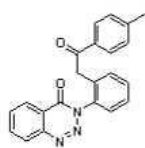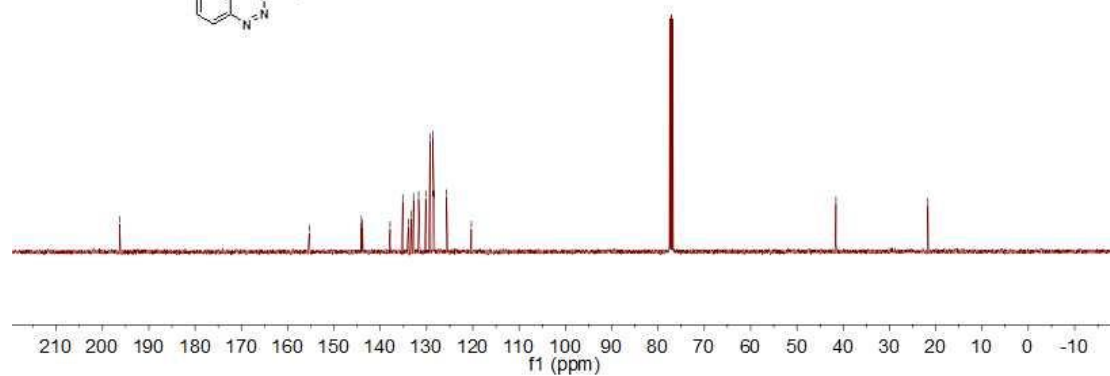

<sup>1</sup>H NMR (400 MHz, CDCl<sub>3</sub>) Spectra of **4ac**

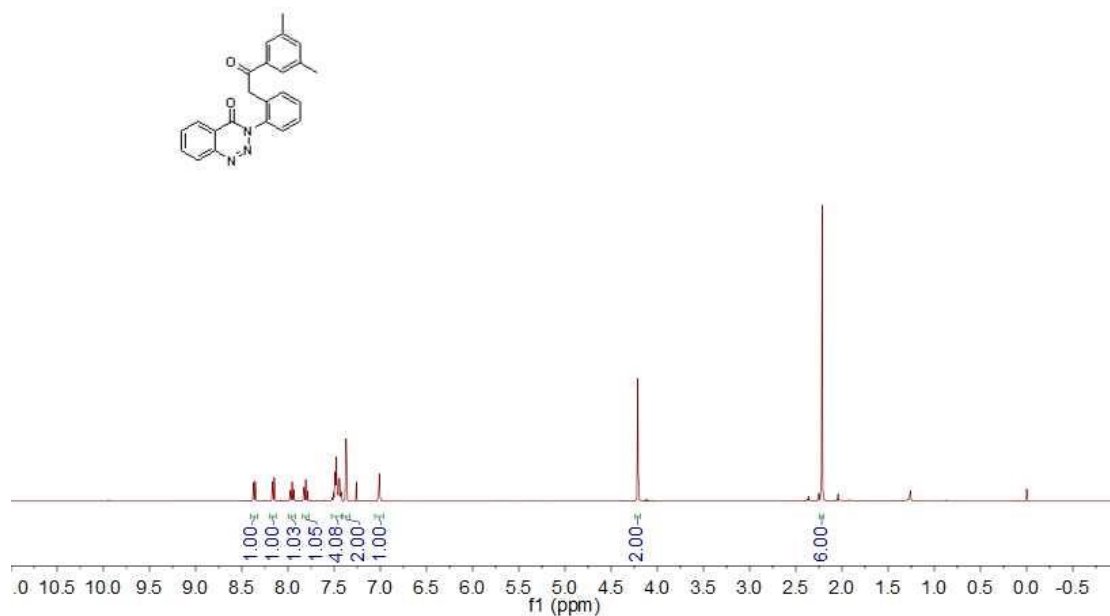

<sup>13</sup>C NMR (101 MHz, CDCl<sub>3</sub>) Spectra of **4ac**

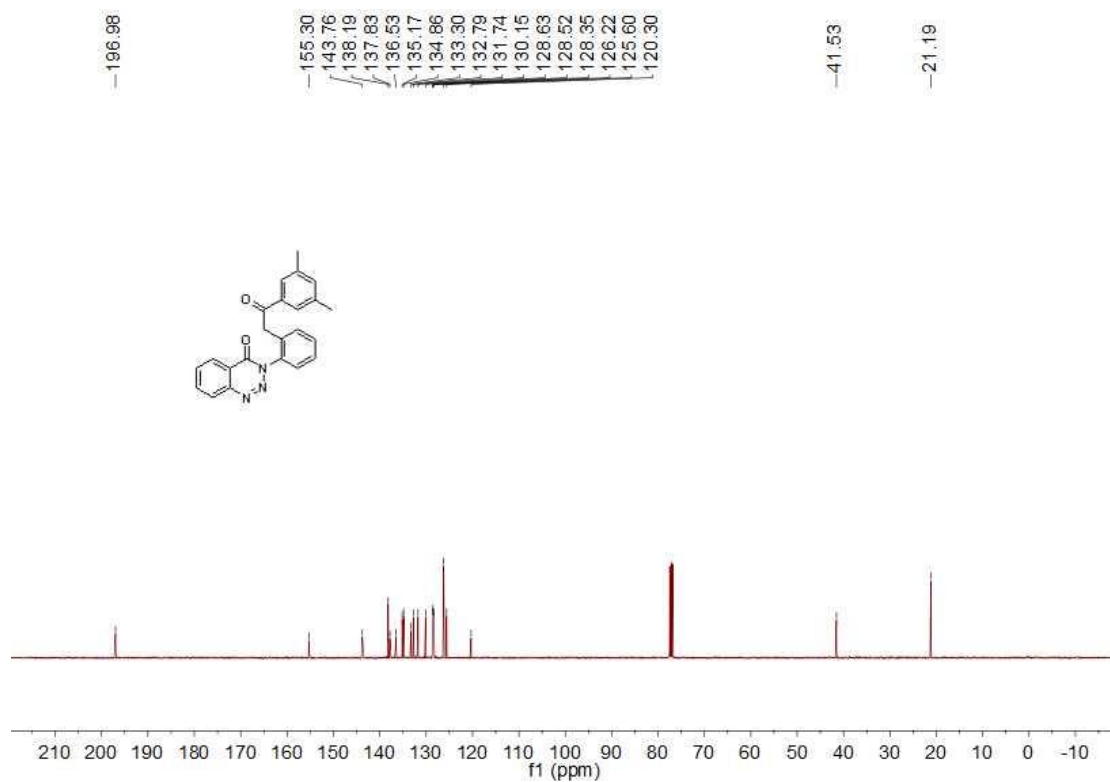

<sup>1</sup>H NMR (400 MHz, CDCl<sub>3</sub>) Spectra of **4ad**

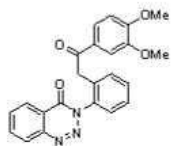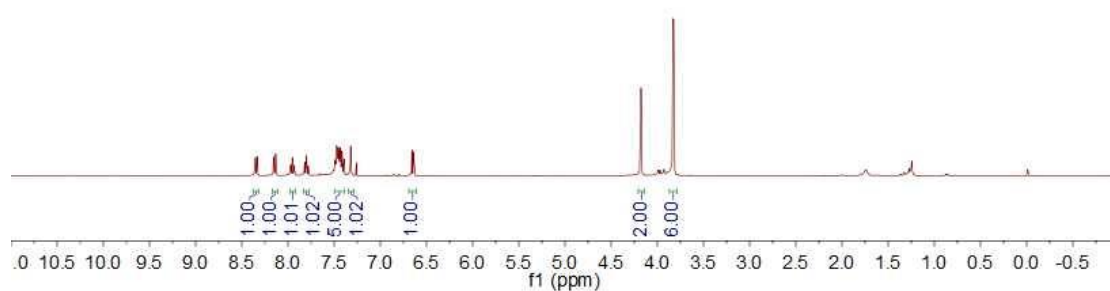

<sup>13</sup>C NMR (101 MHz, CDCl<sub>3</sub>) Spectra of **4ad**

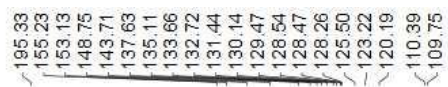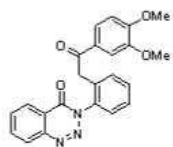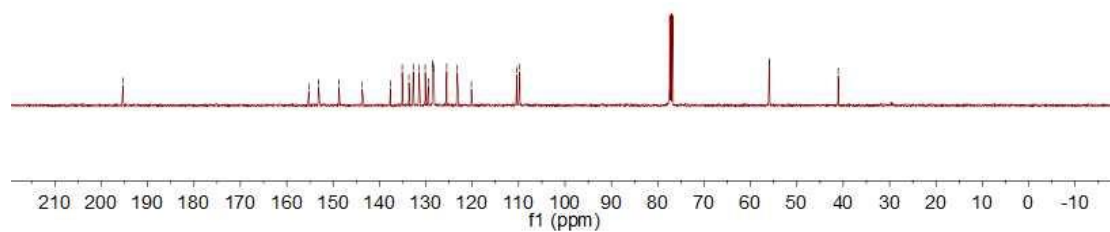



<sup>1</sup>H NMR (400 MHz, CDCl<sub>3</sub>) Spectra of **4ae**

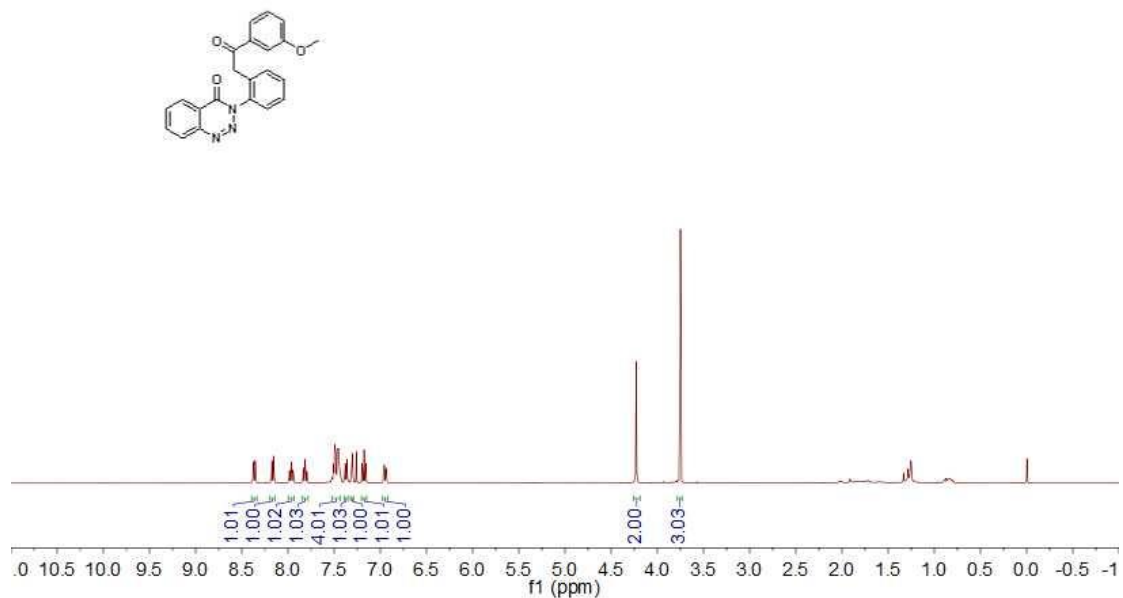

<sup>13</sup>C NMR (101 MHz, CDCl<sub>3</sub>) Spectra of **4ae**

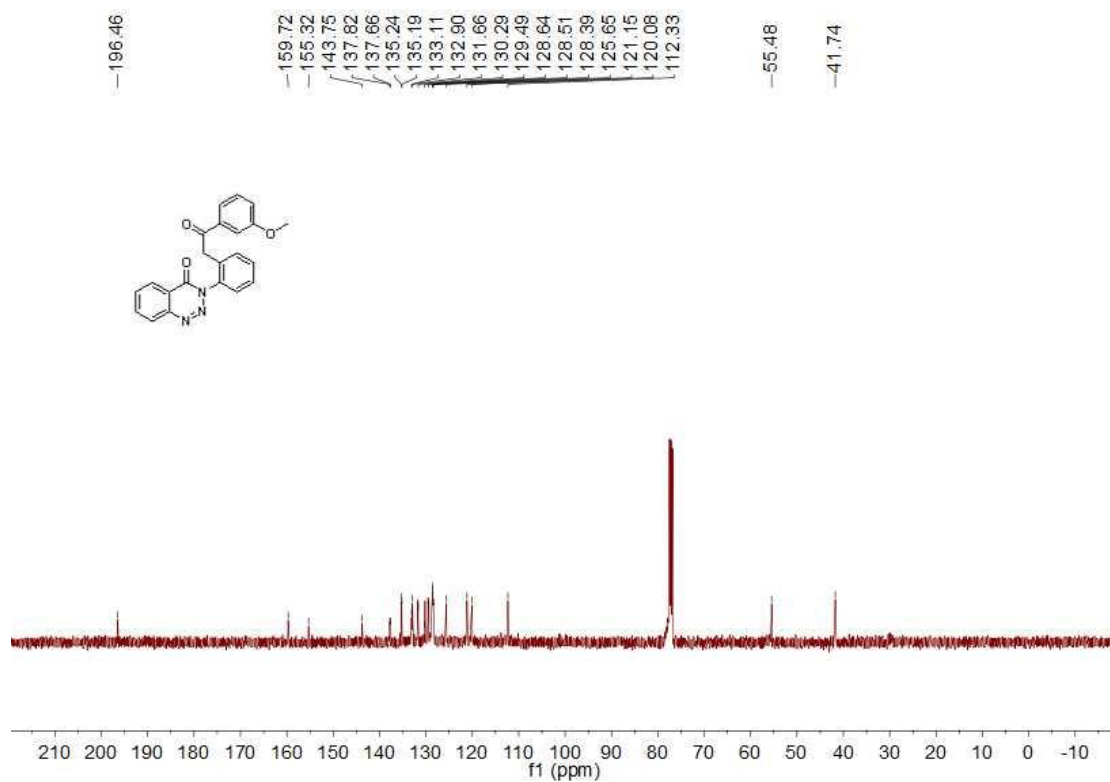

<sup>1</sup>H NMR (400 MHz, CDCl<sub>3</sub>) Spectra of **4af**

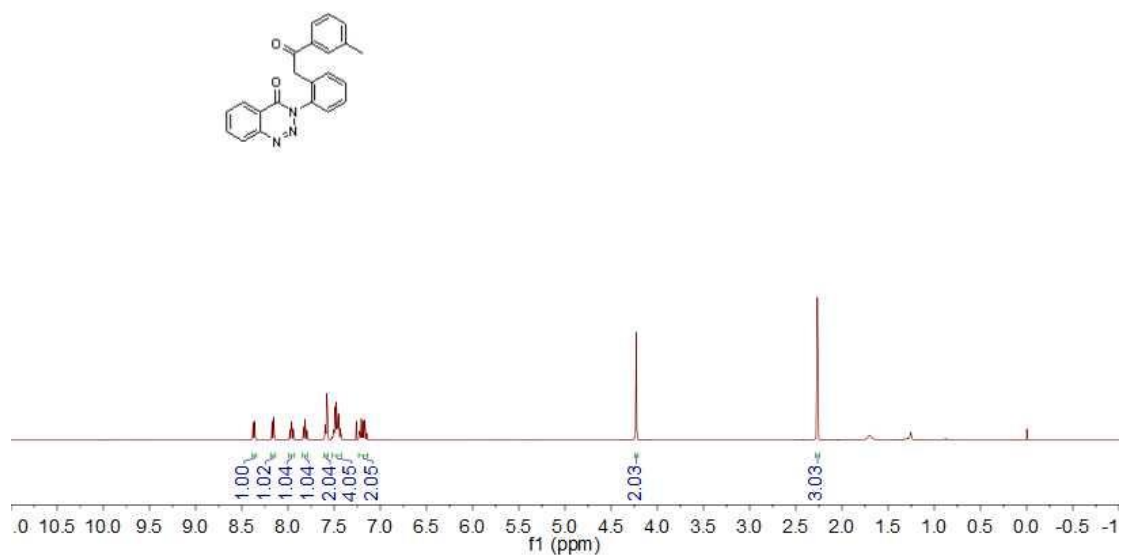

<sup>13</sup>C NMR (101 MHz, CDCl<sub>3</sub>) Spectra of **4af**

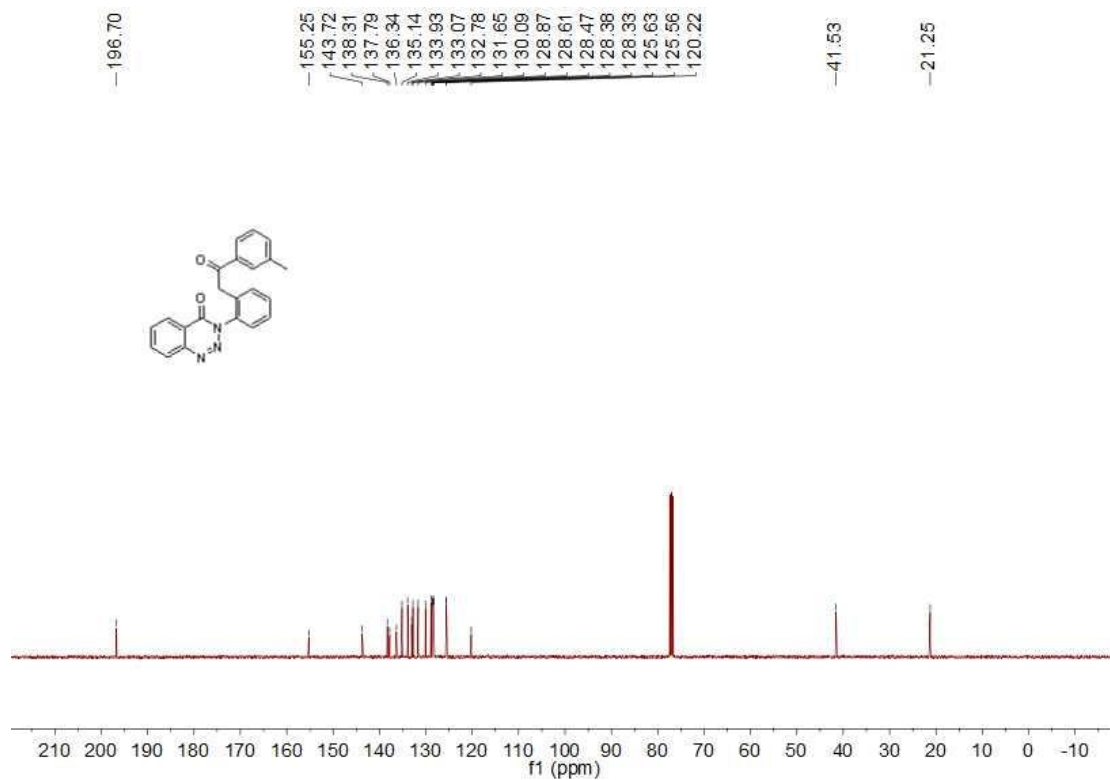

<sup>1</sup>H NMR (400 MHz, CDCl<sub>3</sub>) Spectra of **4ag**

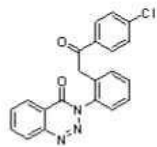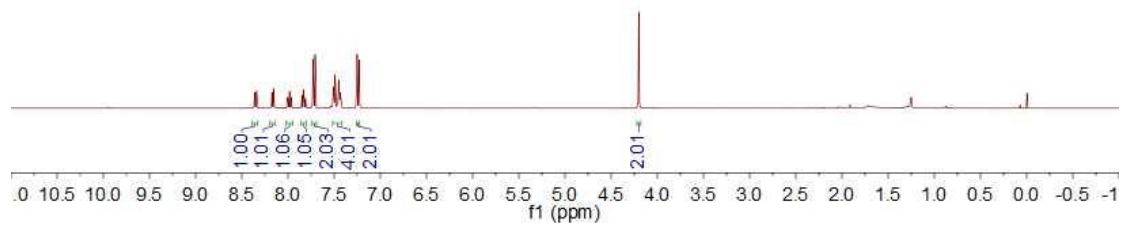

<sup>13</sup>C NMR (101 MHz, CDCl<sub>3</sub>) Spectra of **4ag**

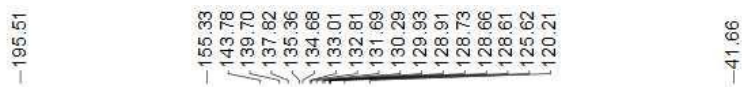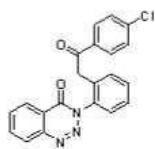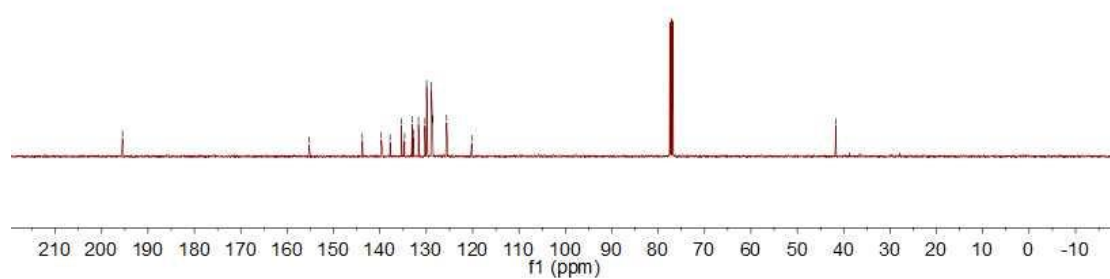

<sup>1</sup>H NMR (400 MHz, CDCl<sub>3</sub>) Spectra of **4ah**

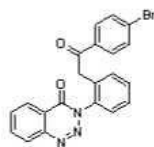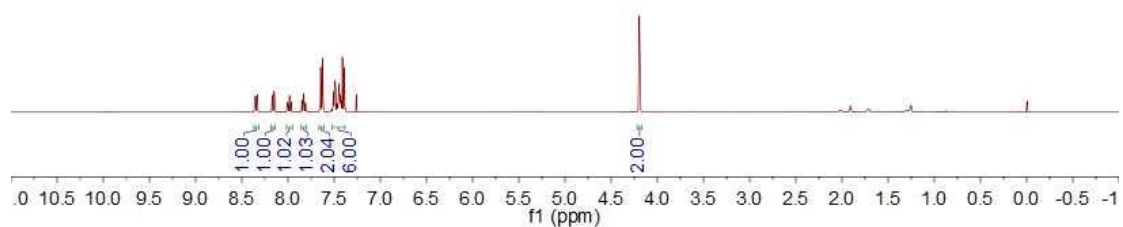

<sup>13</sup>C NMR (101 MHz, CDCl<sub>3</sub>) Spectra of **4ah**

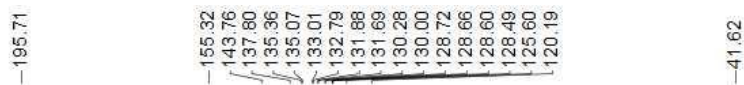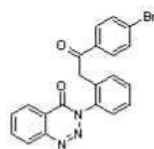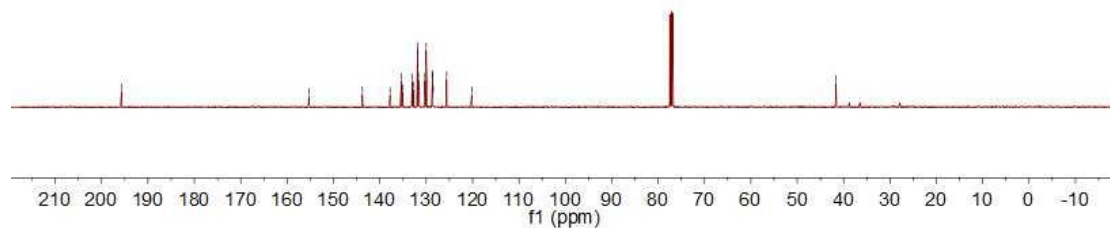

<sup>1</sup>H NMR (400 MHz, CDCl<sub>3</sub>) Spectra of **4ai**

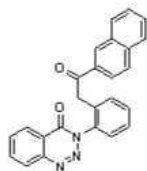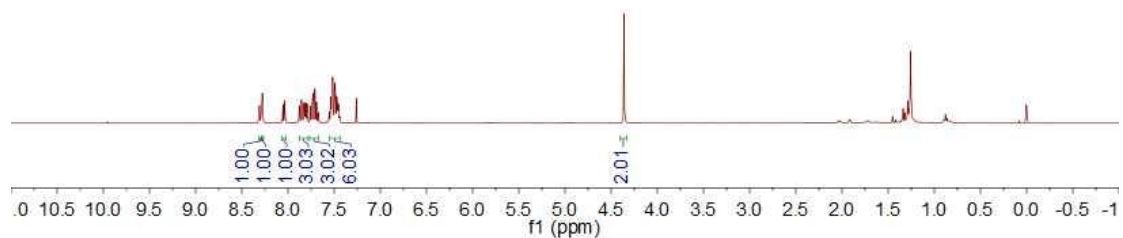

<sup>13</sup>C NMR (101 MHz, CDCl<sub>3</sub>) Spectra of **4ai**

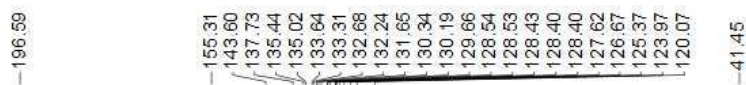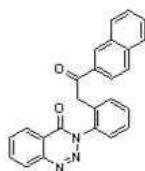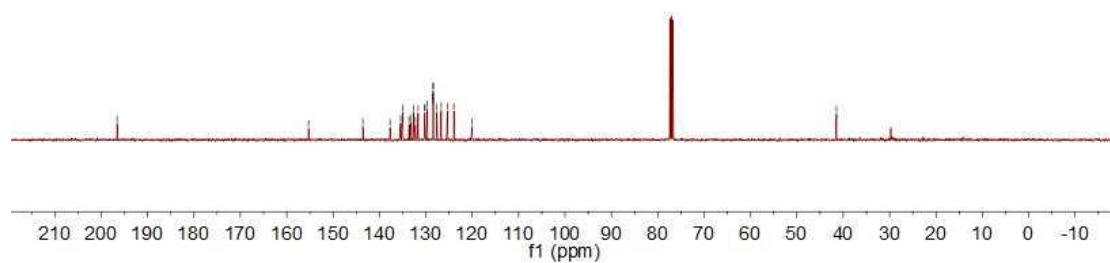

<sup>1</sup>H NMR (400 MHz, CDCl<sub>3</sub>) Spectra of **4aj**

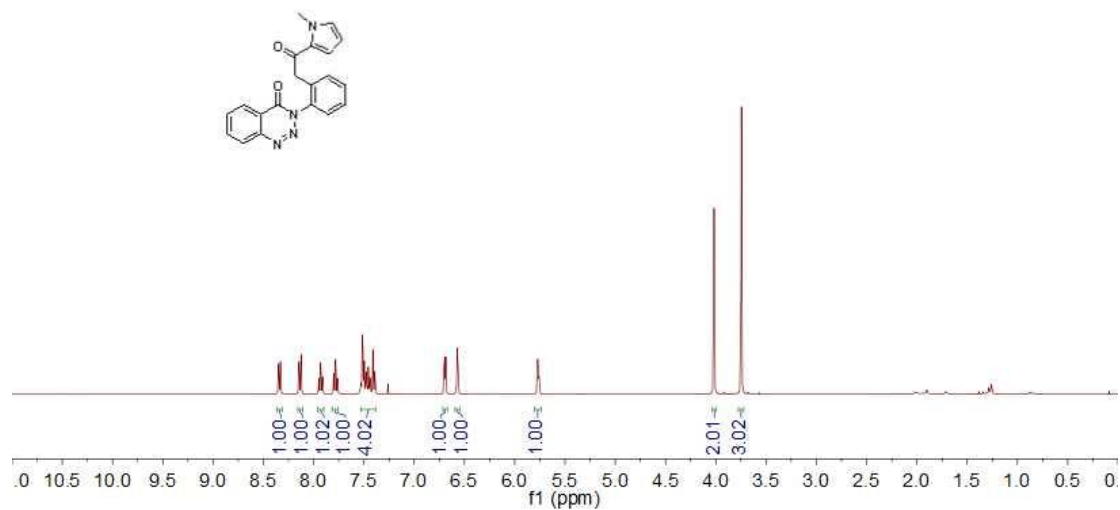

<sup>13</sup>C NMR (101 MHz, CDCl<sub>3</sub>) Spectra of **4aj**

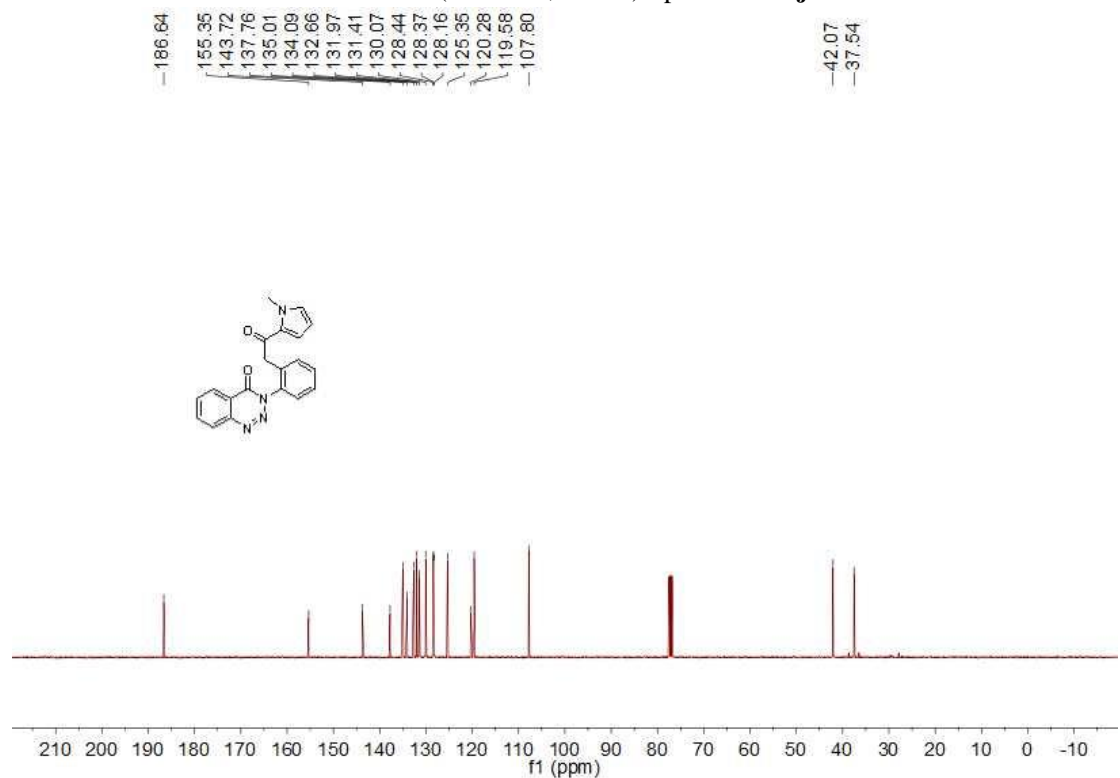

<sup>1</sup>H NMR (400 MHz, CDCl<sub>3</sub>) Spectra of **4ak**

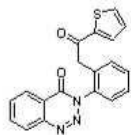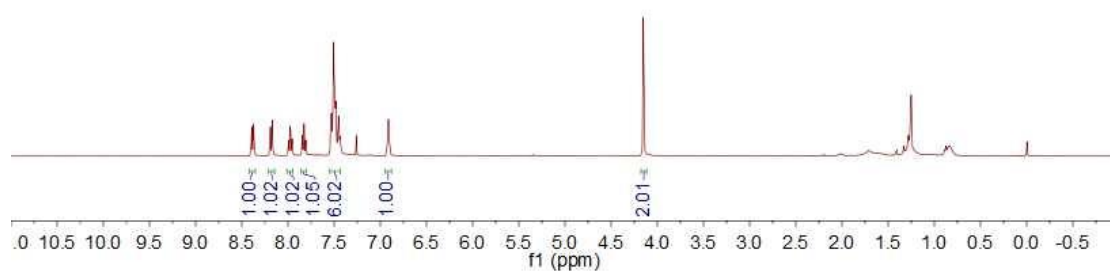

<sup>13</sup>C NMR (101 MHz, CDCl<sub>3</sub>) Spectra of **4ak**

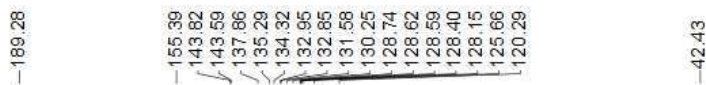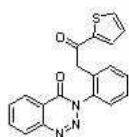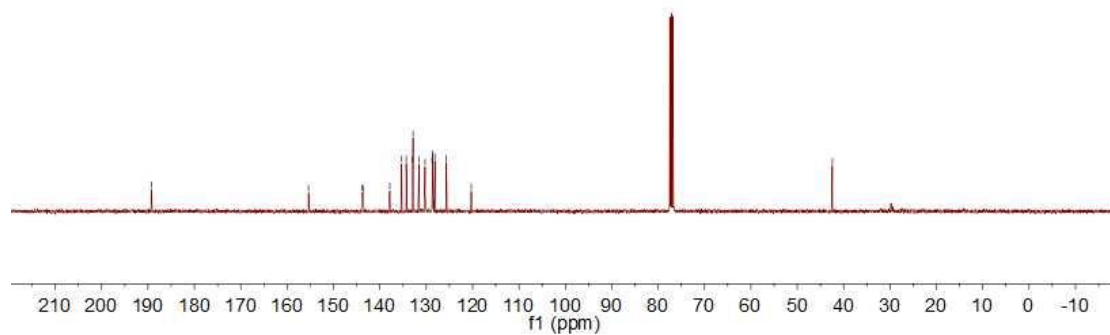

<sup>1</sup>H NMR (400 MHz, CDCl<sub>3</sub>) Spectra of **4al**

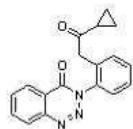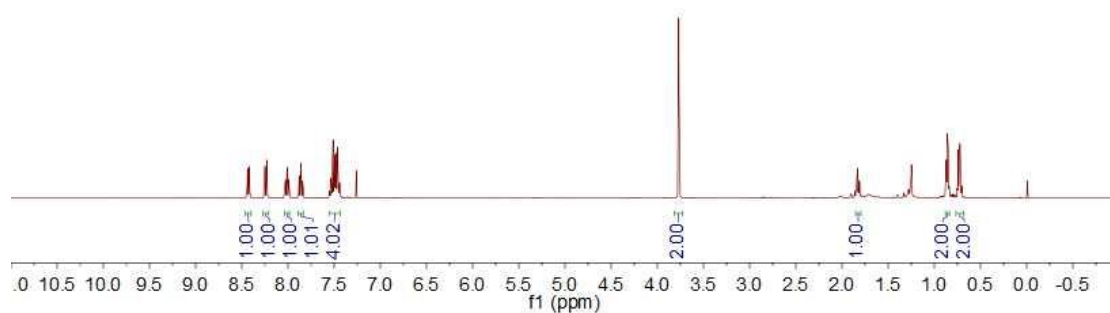

<sup>13</sup>C NMR (101 MHz, CDCl<sub>3</sub>) Spectra of **4al**

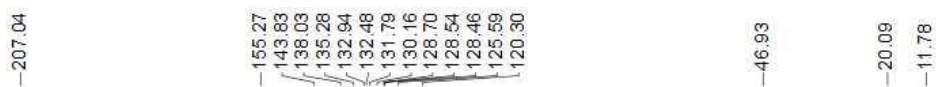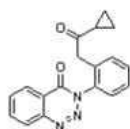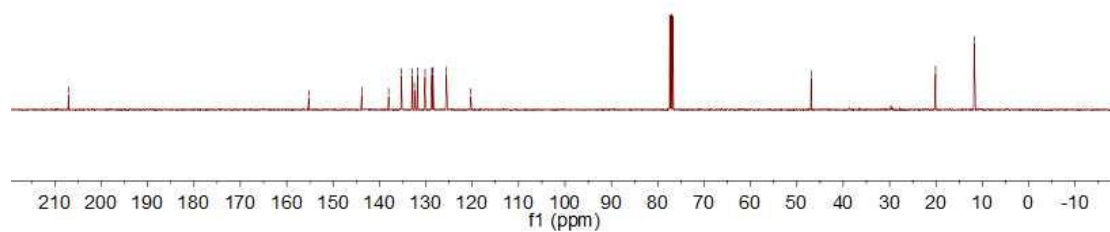



<sup>1</sup>H NMR (400 MHz, CDCl<sub>3</sub>) Spectra of **4am**

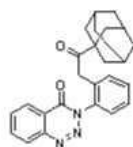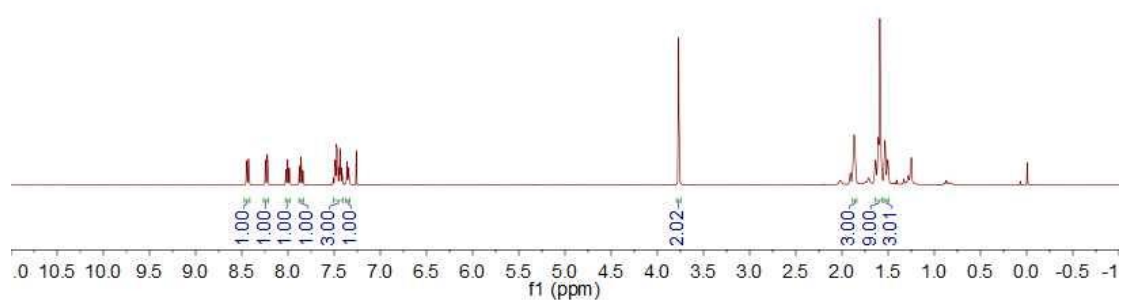

<sup>13</sup>C NMR (101 MHz, CDCl<sub>3</sub>) Spectra of **4am**

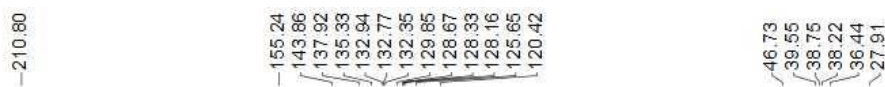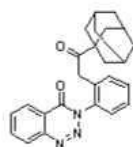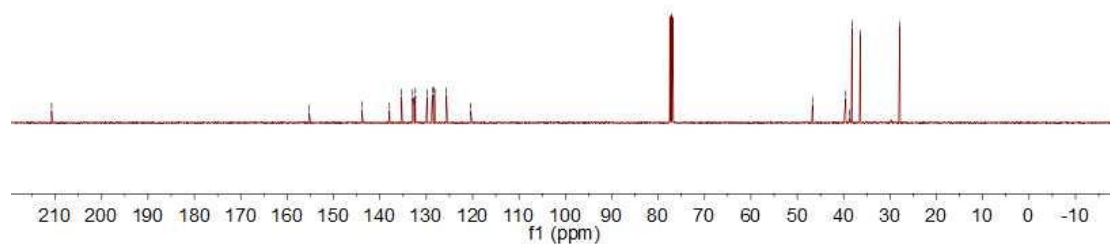

<sup>1</sup>H NMR (400 MHz, CDCl<sub>3</sub>) Spectra of **4an**

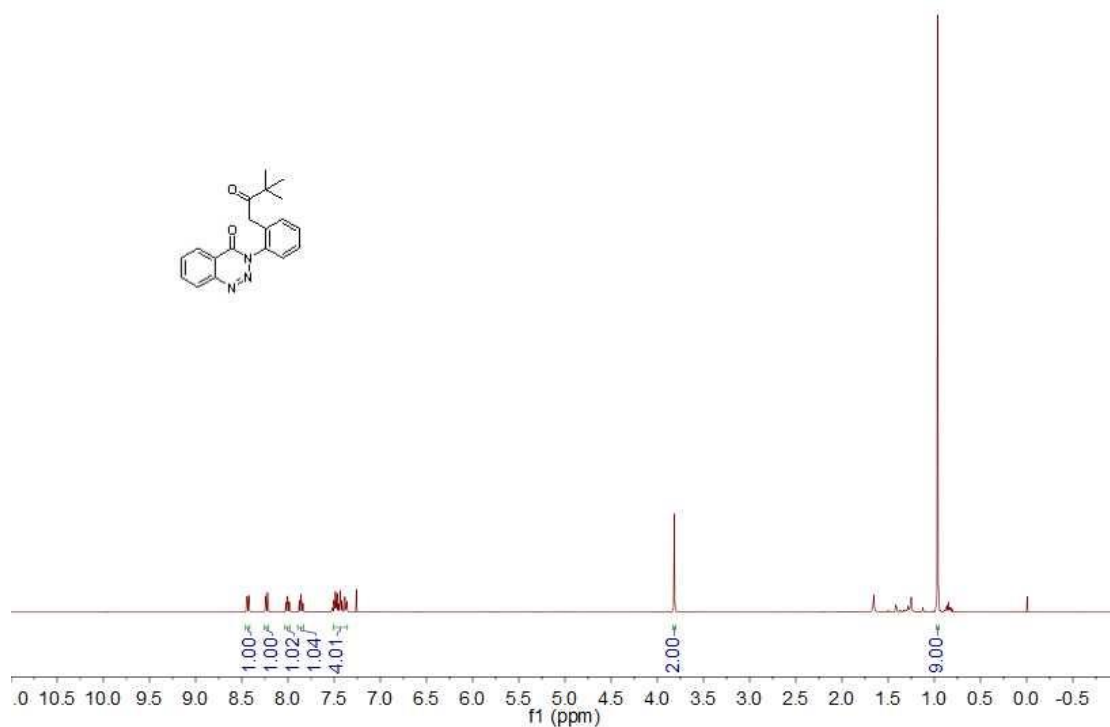

<sup>13</sup>C NMR (101 MHz, CDCl<sub>3</sub>) Spectra of **4an**

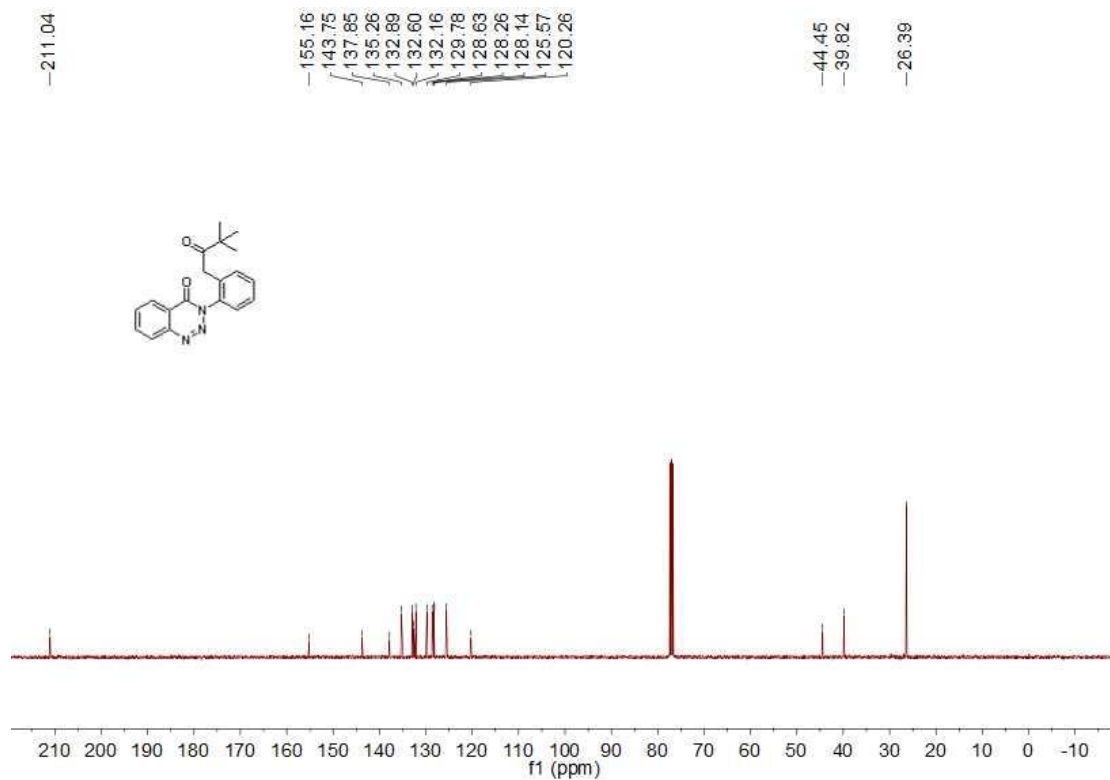

<sup>1</sup>H NMR (400 MHz, CDCl<sub>3</sub>) Spectra of **4ba**

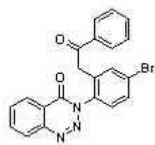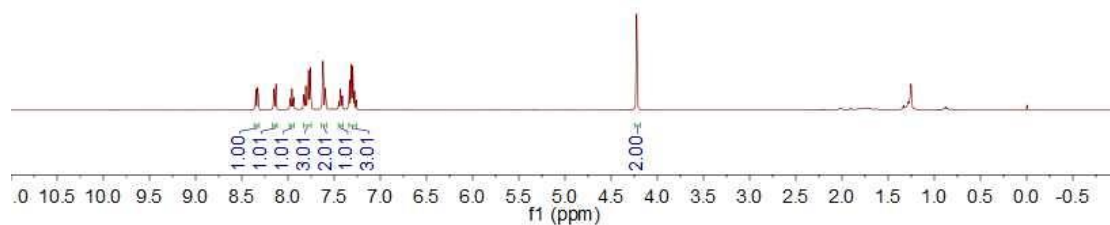

<sup>13</sup>C NMR (101 MHz, CDCl<sub>3</sub>) Spectra of **4ba**

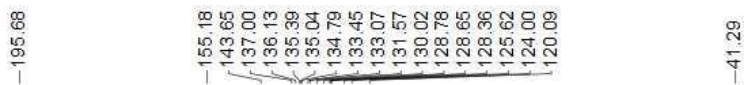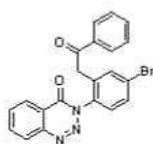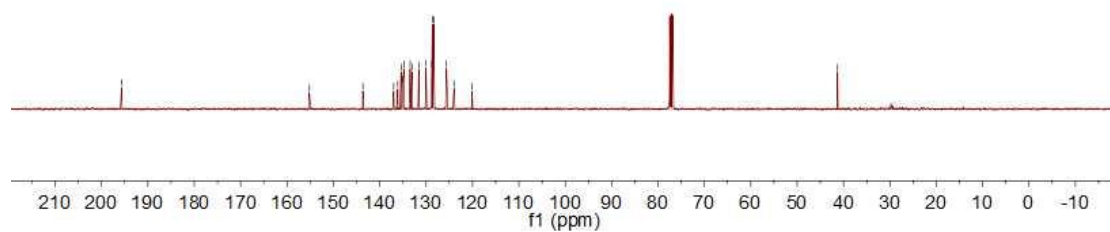

<sup>1</sup>H NMR (400 MHz, CDCl<sub>3</sub>) Spectra of **4ca**

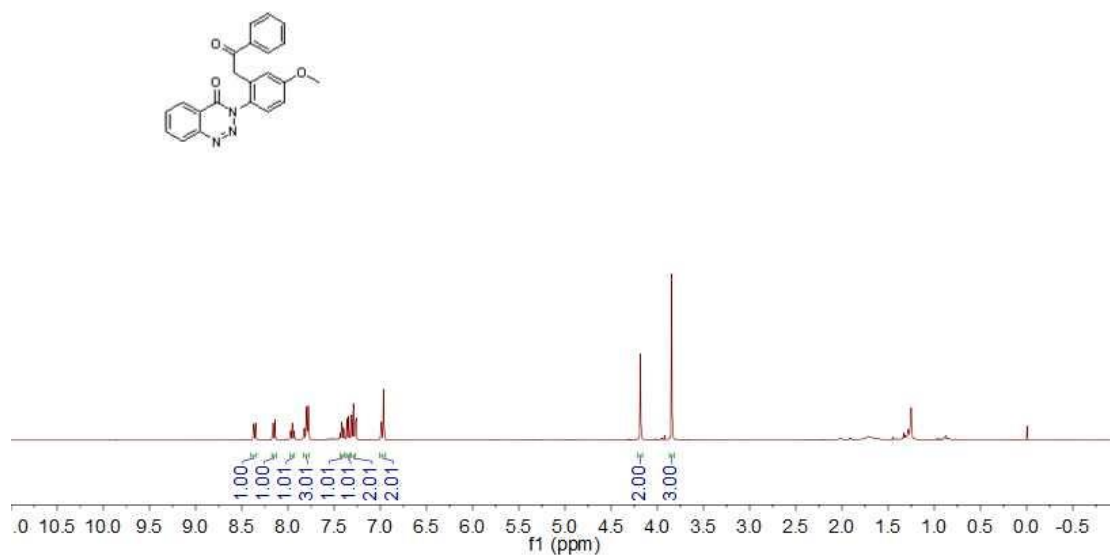

<sup>13</sup>C NMR (101 MHz, CDCl<sub>3</sub>) Spectra of **4ca**

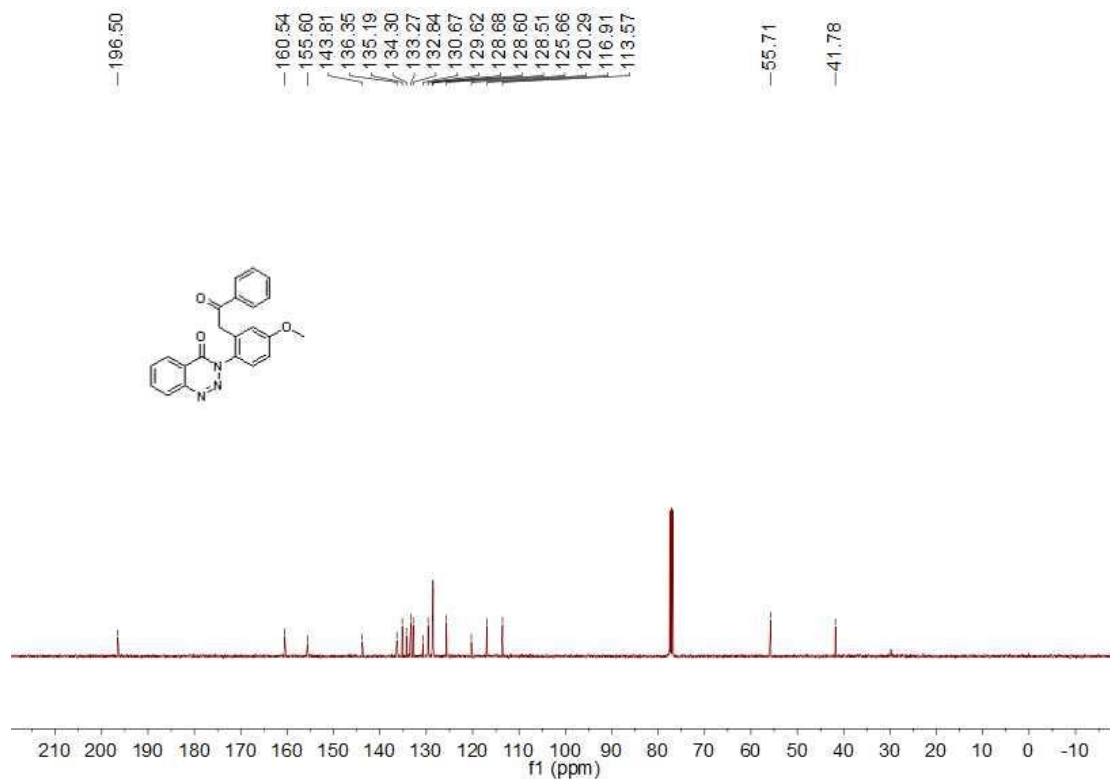

<sup>1</sup>H NMR (400 MHz, CDCl<sub>3</sub>) Spectra of **4da**

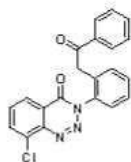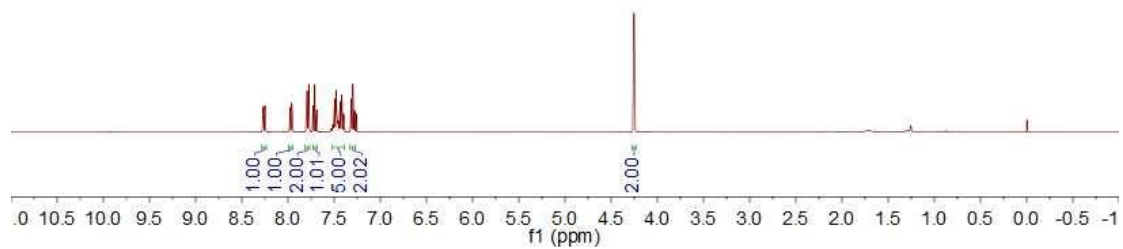

<sup>13</sup>C NMR (101 MHz, CDCl<sub>3</sub>) Spectra of **4da**

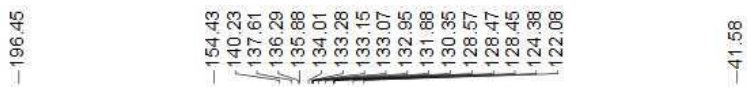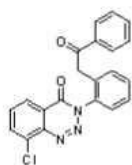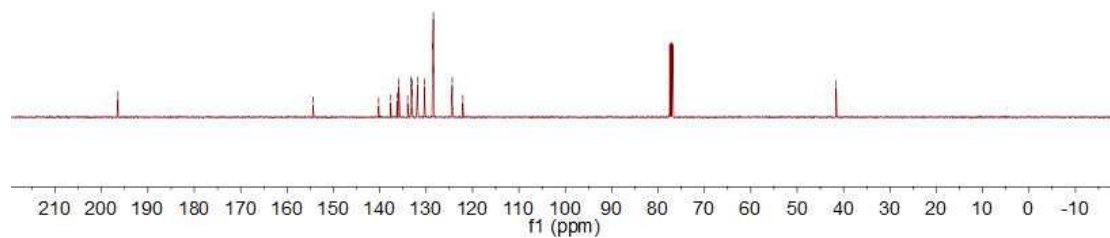

<sup>1</sup>H NMR (400 MHz, CDCl<sub>3</sub>) Spectra of **4ea**

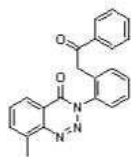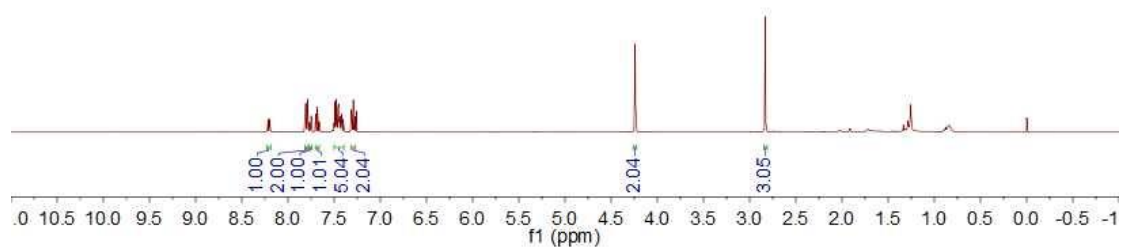

<sup>13</sup>C NMR (101 MHz, CDCl<sub>3</sub>) Spectra of **4ea**

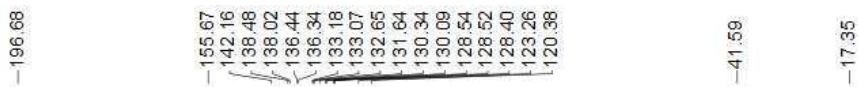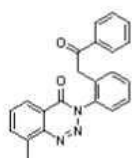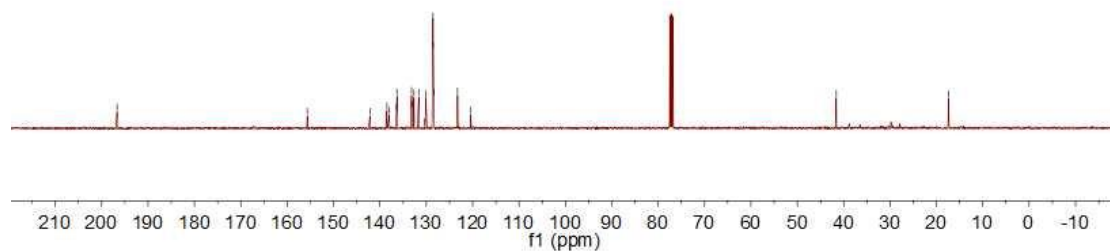

<sup>1</sup>H NMR (400 MHz, CDCl<sub>3</sub>) Spectra of **5aa**

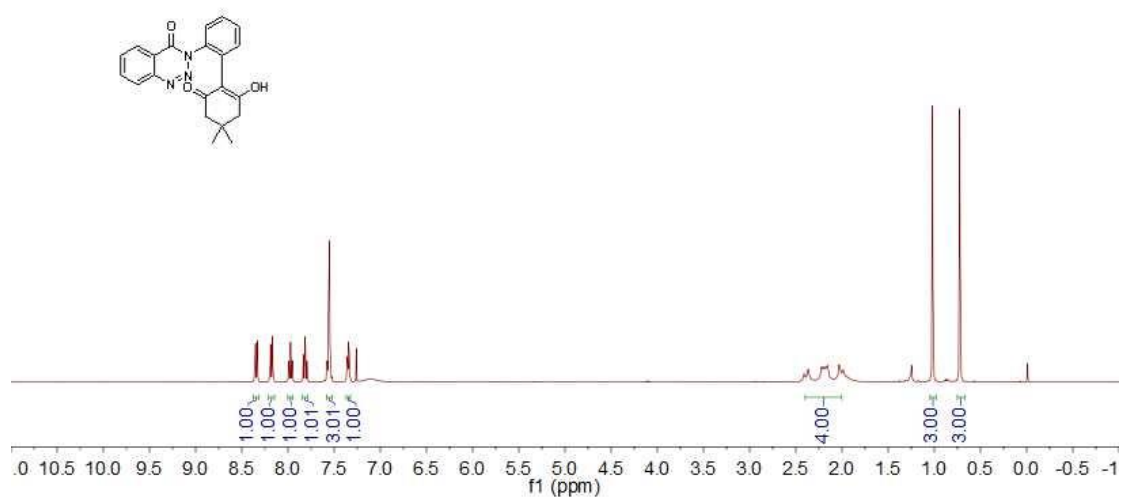

<sup>13</sup>C NMR (101 MHz, CDCl<sub>3</sub>) Spectra of **5aa**

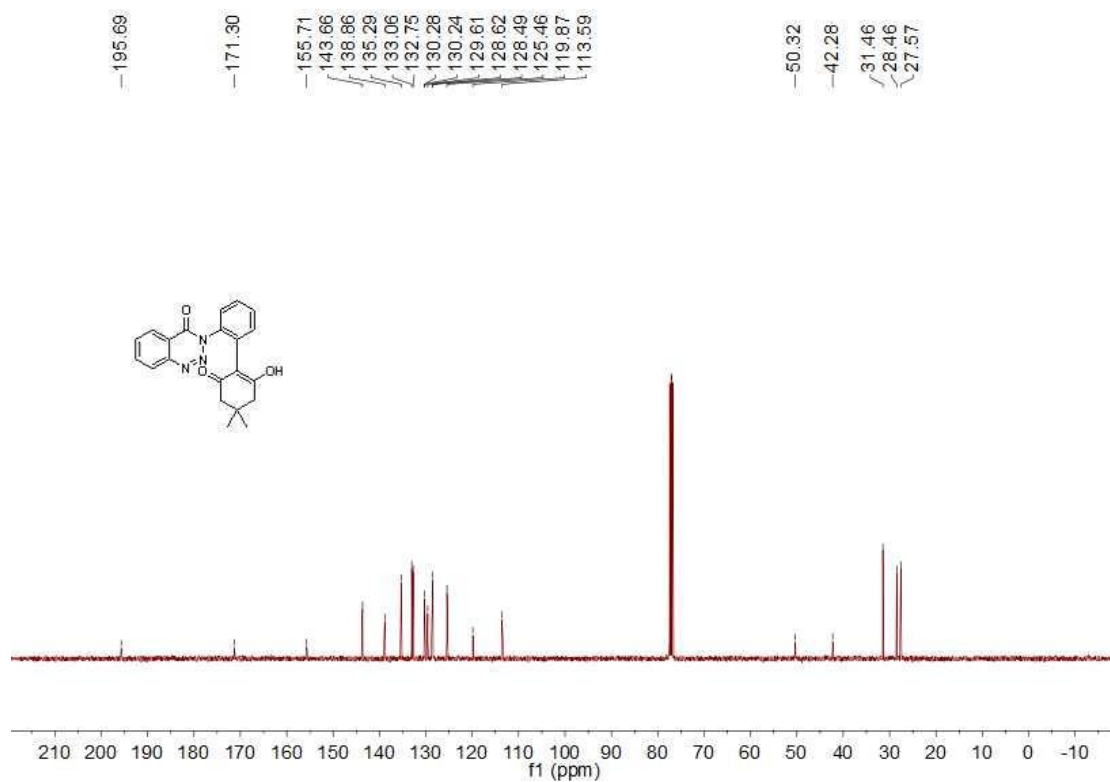

<sup>1</sup>H NMR (400 MHz, CDCl<sub>3</sub>) Spectra of **5ba**

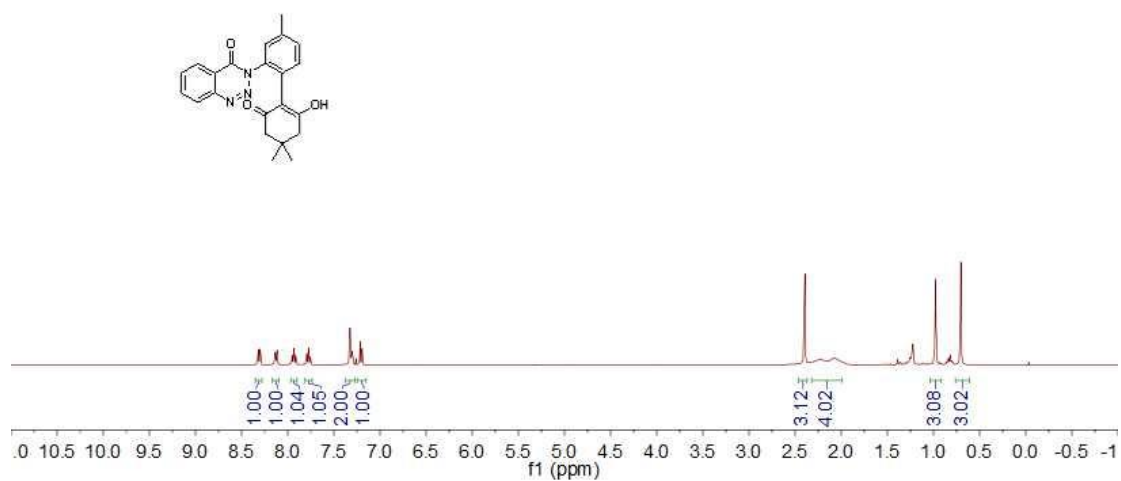

<sup>13</sup>C NMR (101 MHz, DMSO-*d*<sub>6</sub>) Spectra of **5ba**

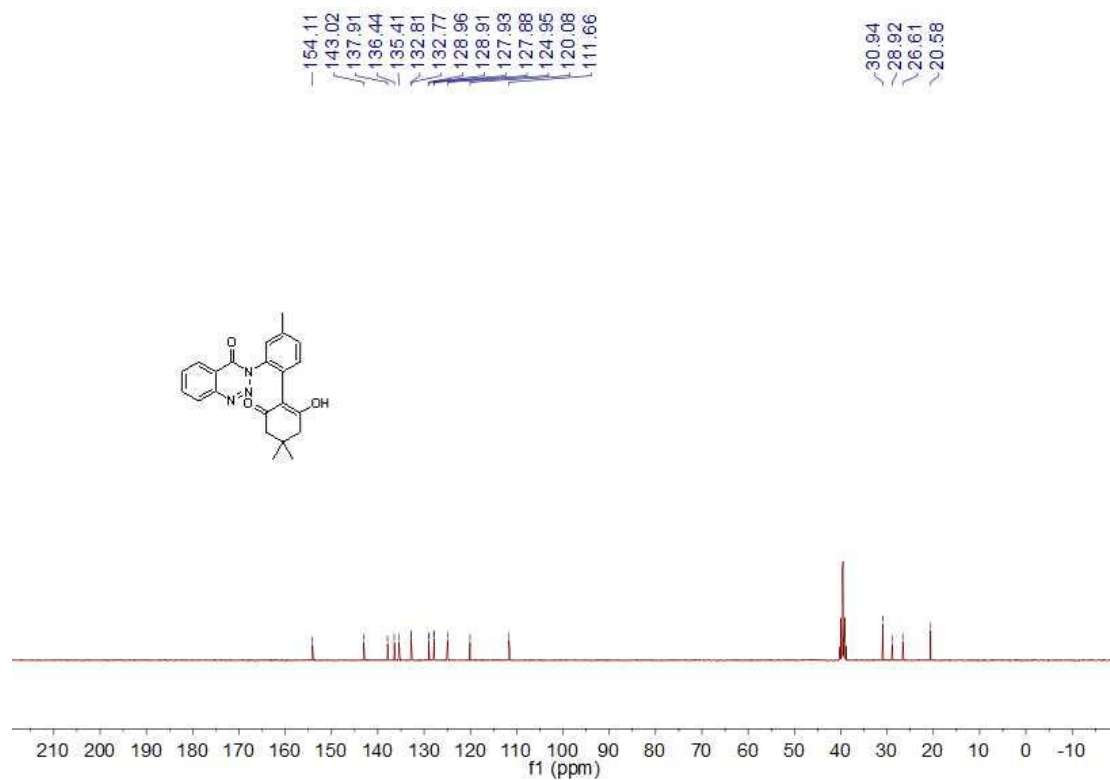



<sup>1</sup>H NMR (600 MHz, CDCl<sub>3</sub>) Spectra of **5ca**

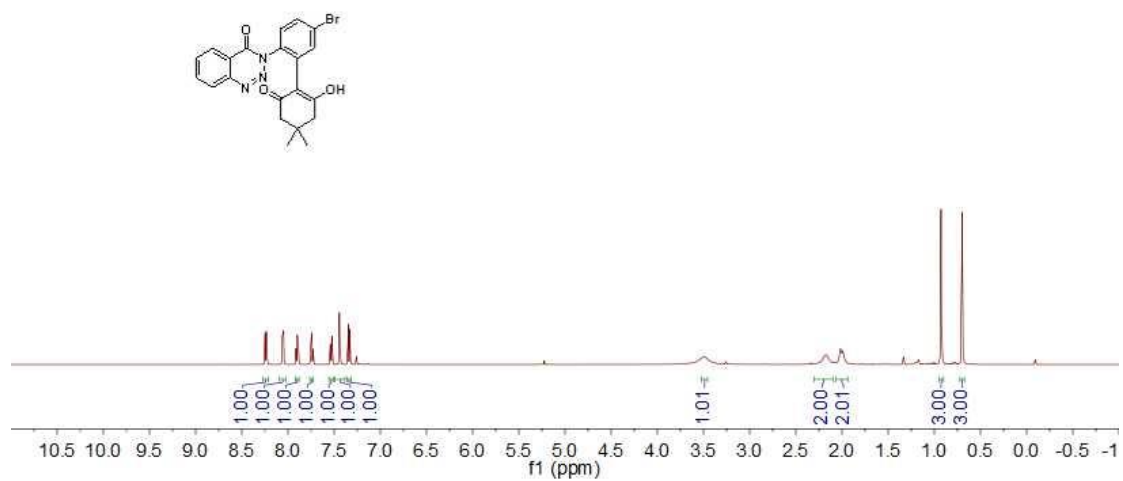

<sup>13</sup>C NMR (151 MHz, CDCl<sub>3</sub>) Spectra of **5ca**

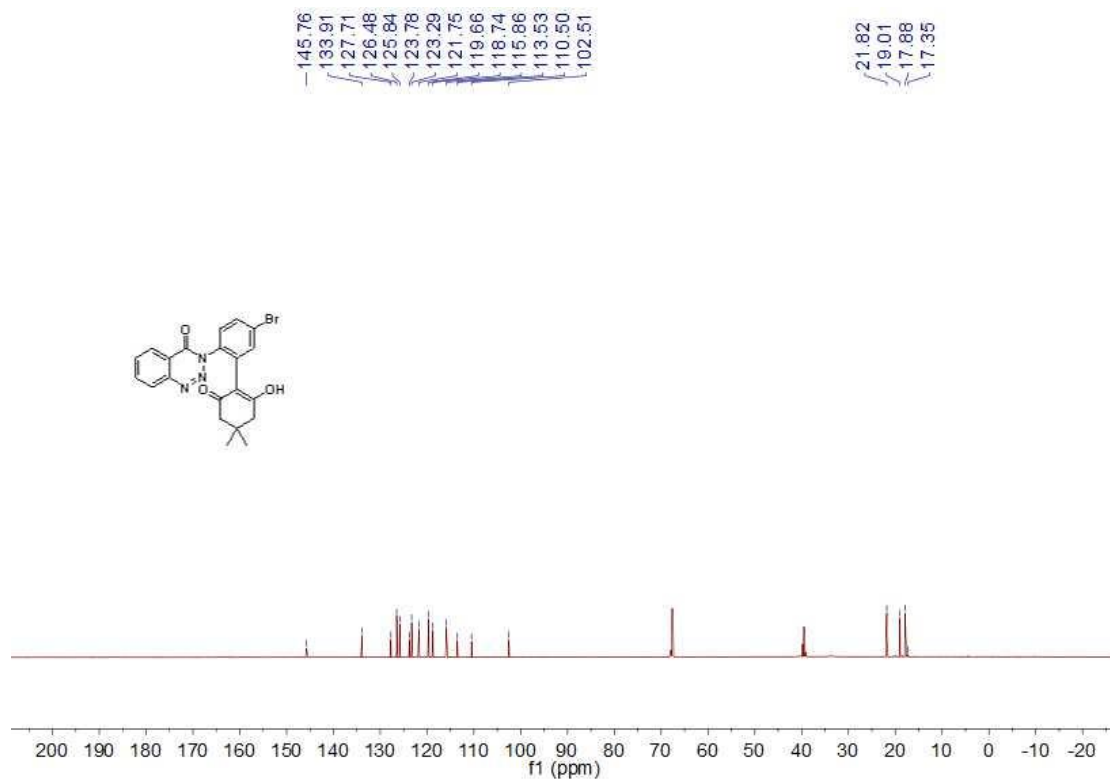

<sup>1</sup>H NMR (400 MHz, CDCl<sub>3</sub>) Spectra of **5da**

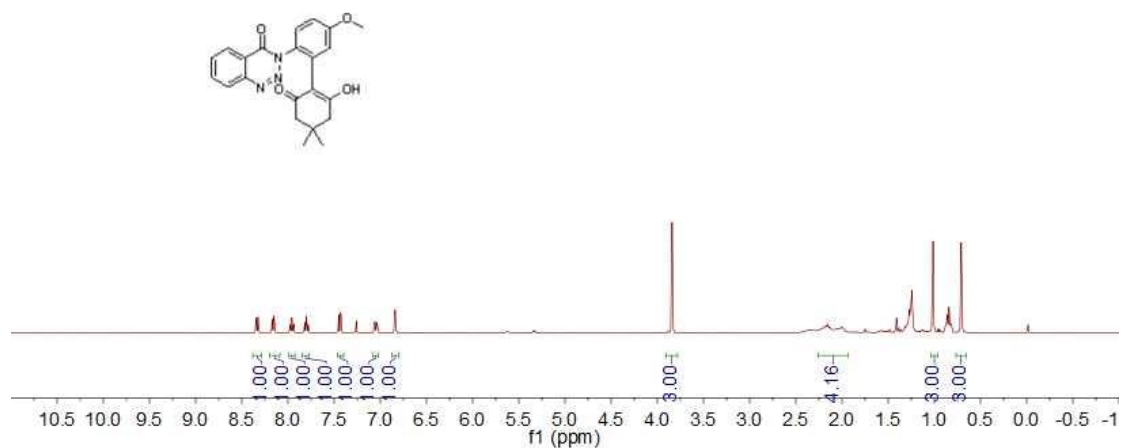

<sup>13</sup>C NMR (101 MHz, DMSO-*d*<sub>6</sub>) Spectra of **5da**

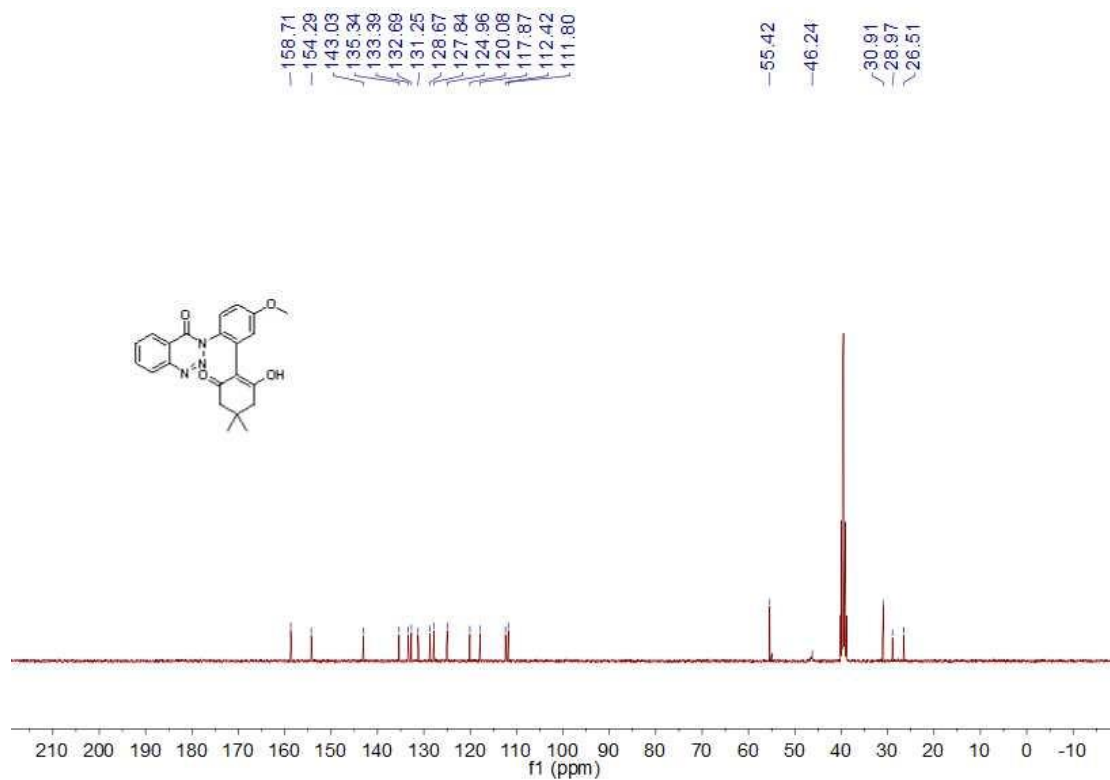

<sup>1</sup>H NMR (400 MHz, CDCl<sub>3</sub>) Spectra of **5ea**

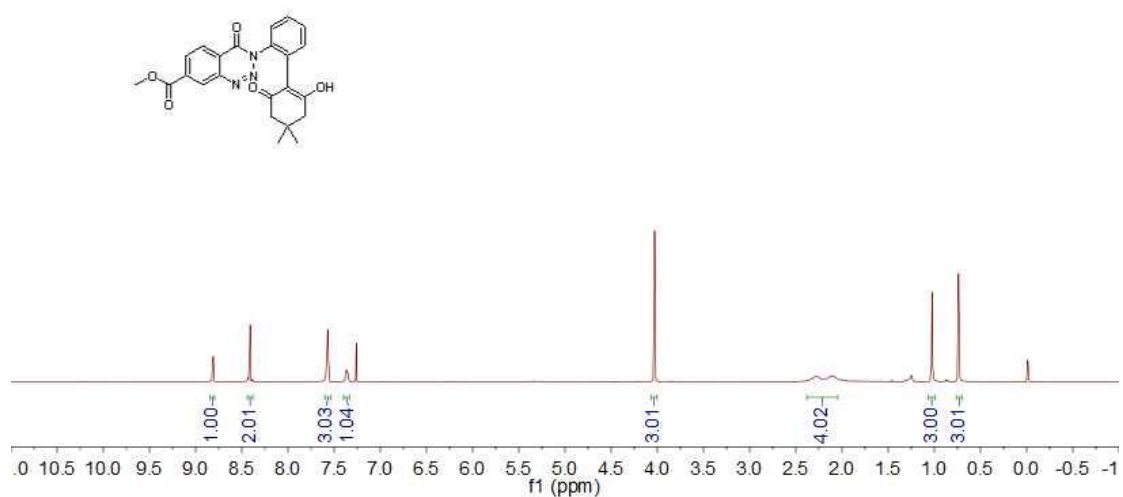

<sup>13</sup>C NMR (101 MHz, DMSO-*d*<sub>6</sub>) Spectra of **5ea**

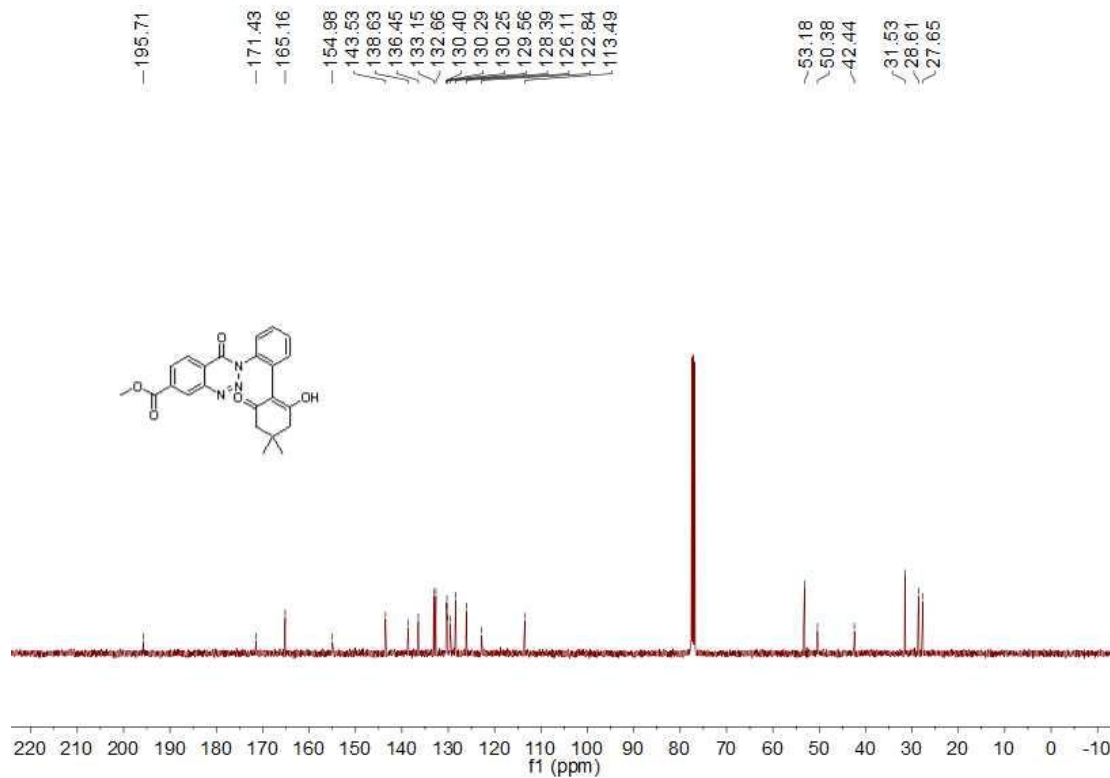

<sup>1</sup>H NMR (400 MHz, CDCl<sub>3</sub>) Spectra of **5fa**

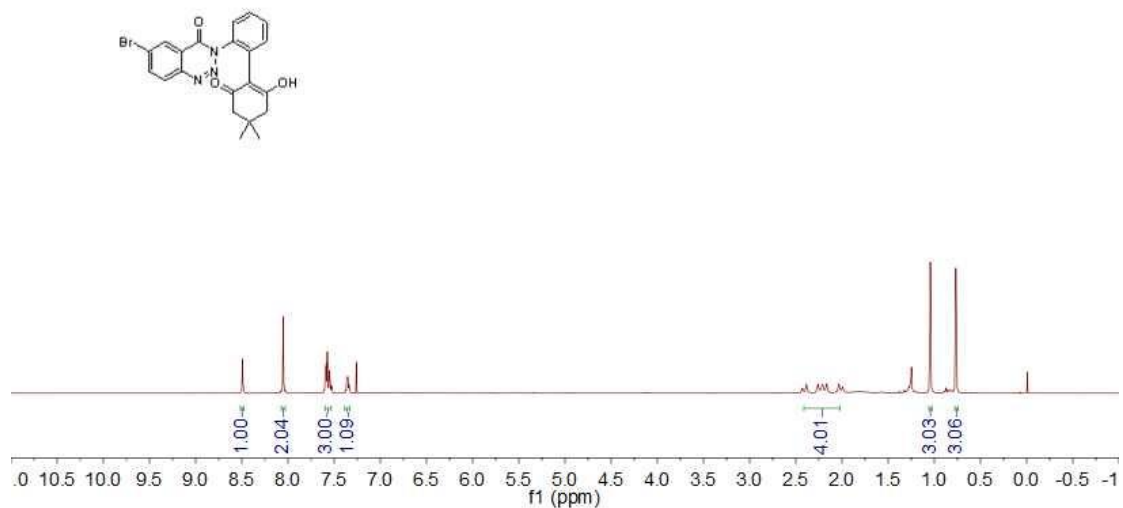

<sup>13</sup>C NMR (101 MHz, CDCl<sub>3</sub>) Spectra of **5fa**

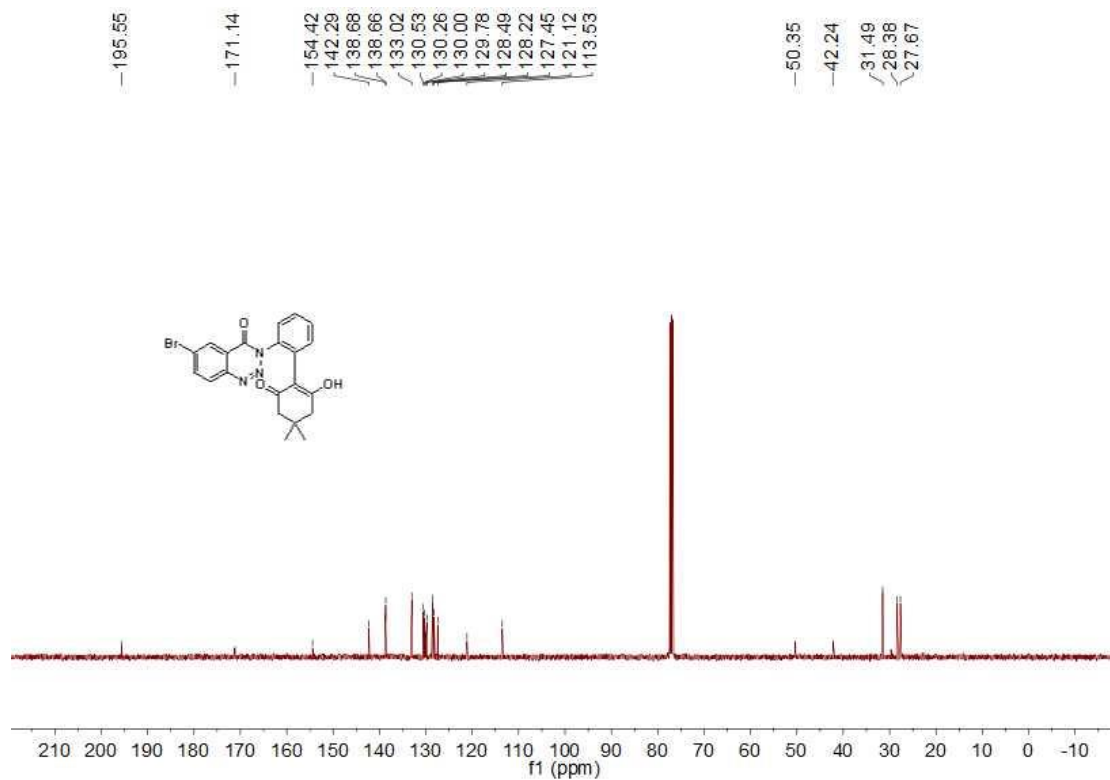

<sup>1</sup>H NMR (400 MHz, CDCl<sub>3</sub>) Spectra of **5ga**

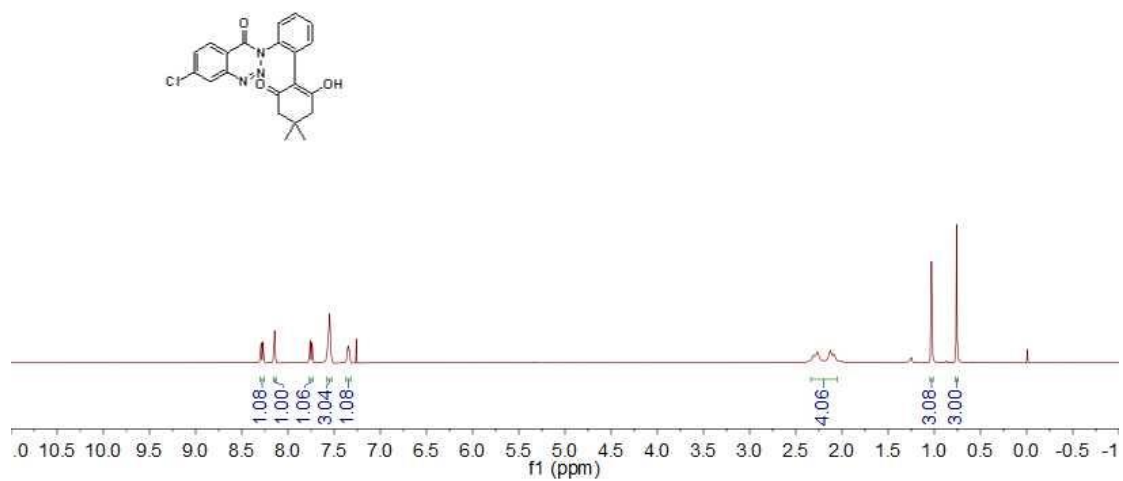

<sup>13</sup>C NMR (101 MHz, CDCl<sub>3</sub>) Spectra of **5ga**

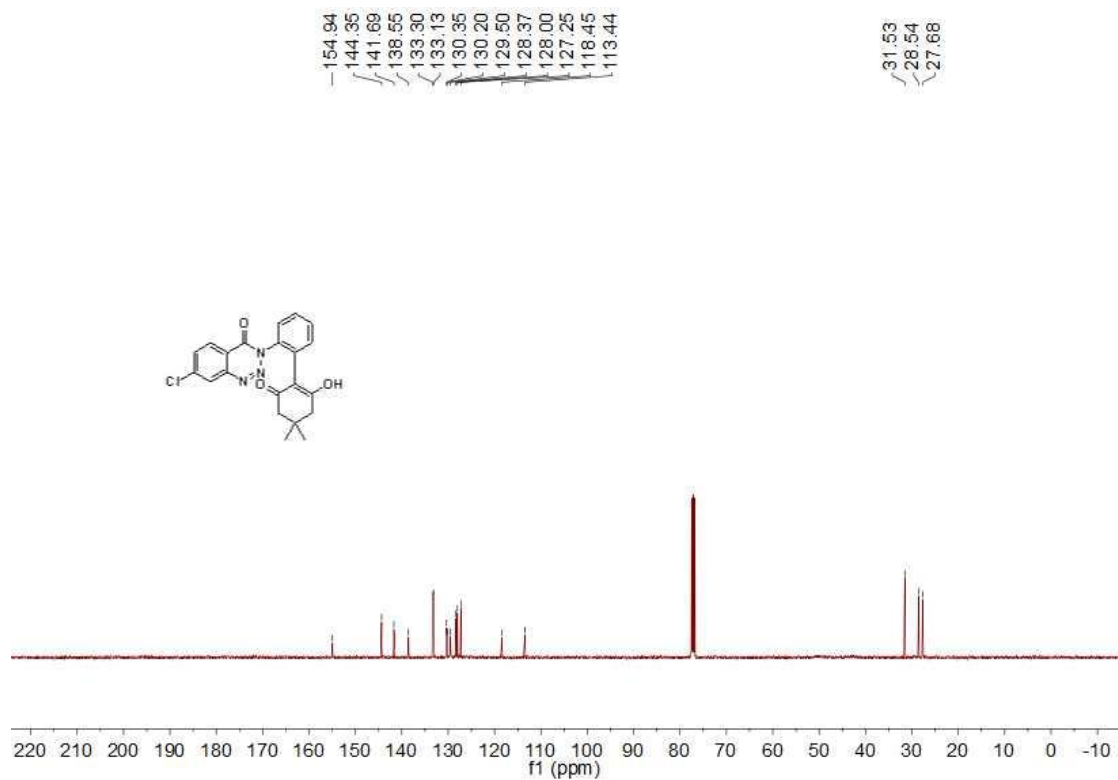

<sup>1</sup>H NMR (400 MHz, CDCl<sub>3</sub>) Spectra of **5ha**

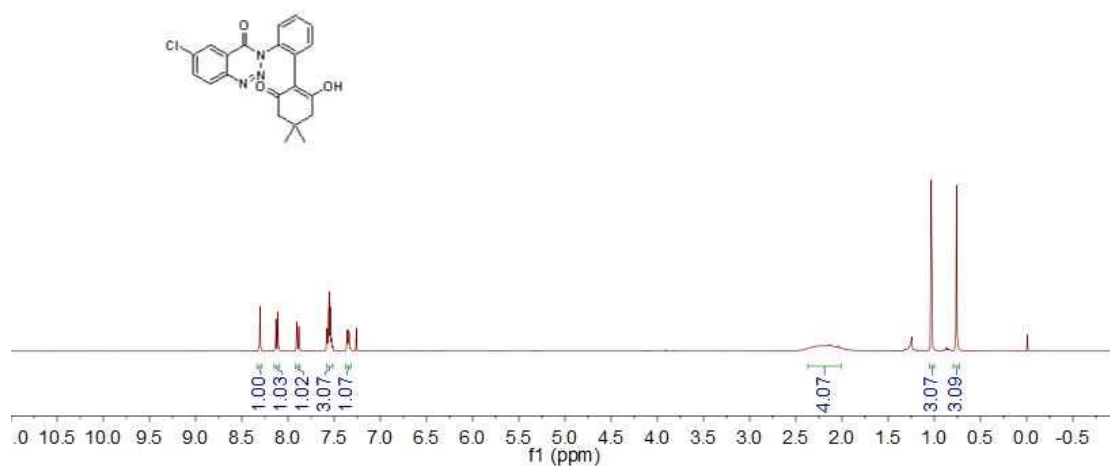

<sup>13</sup>C NMR (101 MHz, CDCl<sub>3</sub>) Spectra of **5ha**

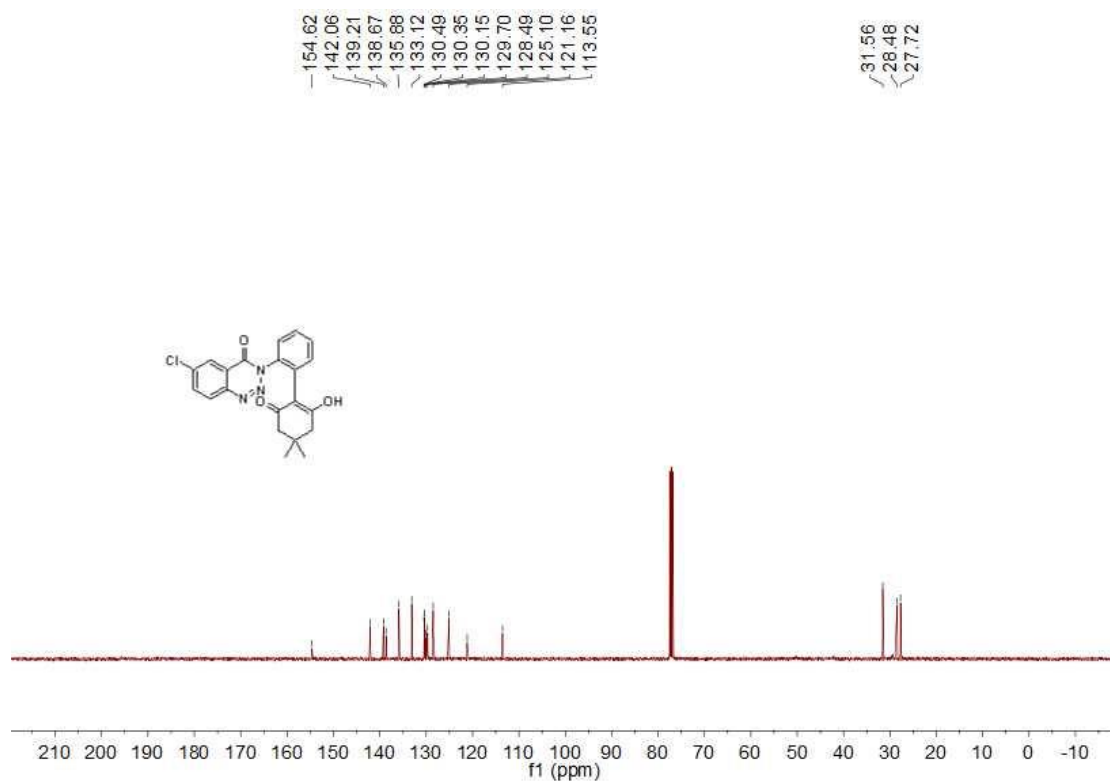

<sup>1</sup>H NMR (400 MHz, CDCl<sub>3</sub>) Spectra of **5ia**

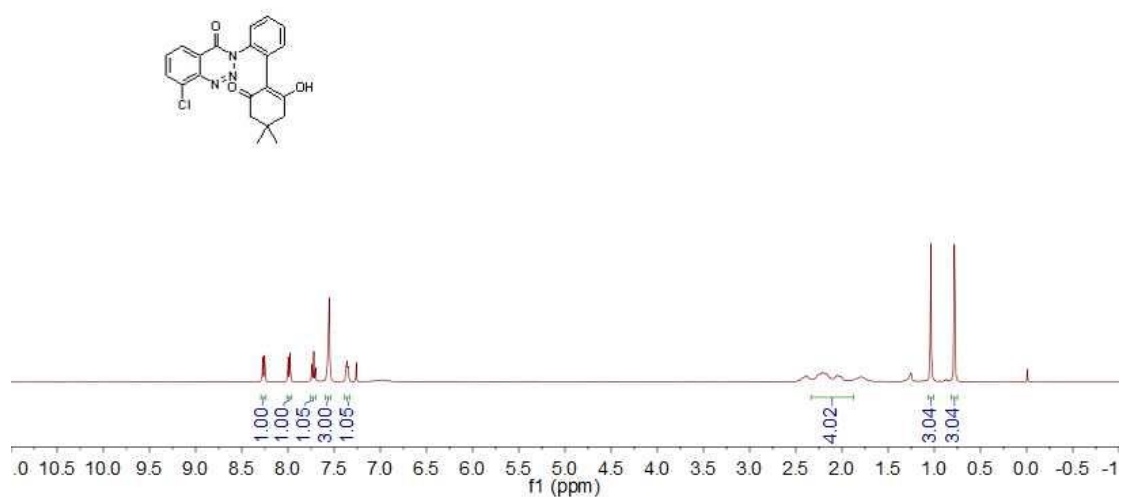

<sup>13</sup>C NMR (101 MHz, CDCl<sub>3</sub>) Spectra of **5ia**

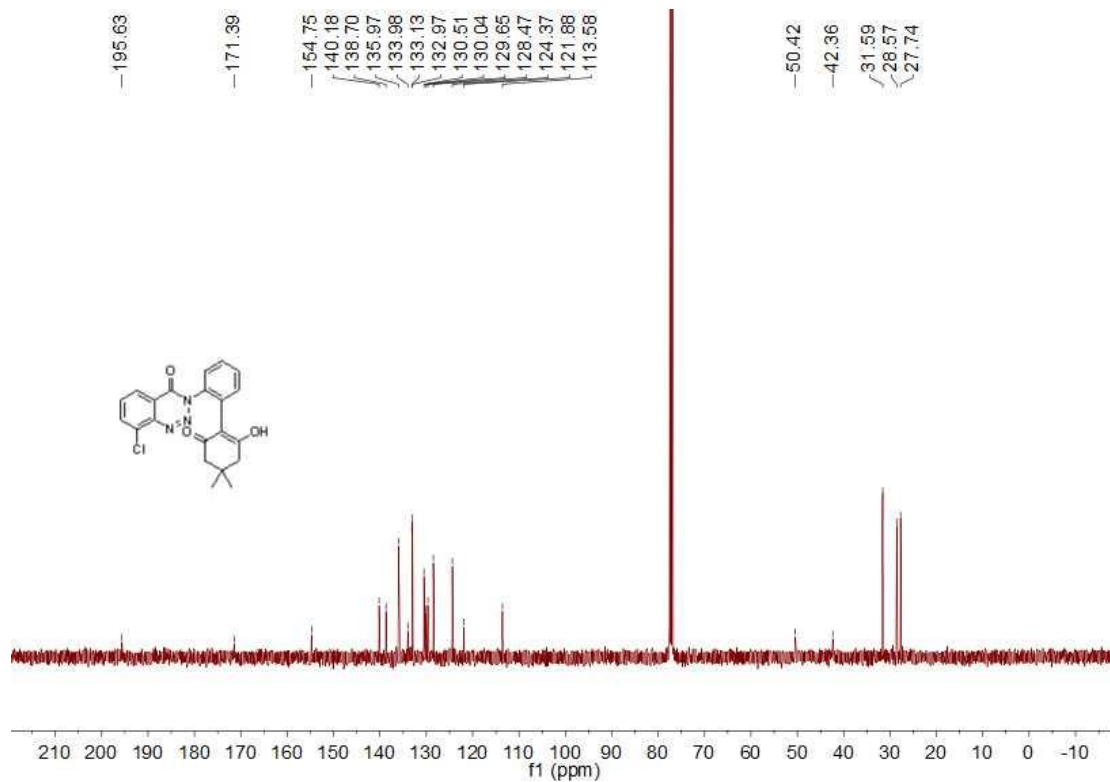

<sup>1</sup>H NMR (400 MHz, CDCl<sub>3</sub>) Spectra of **5ja**

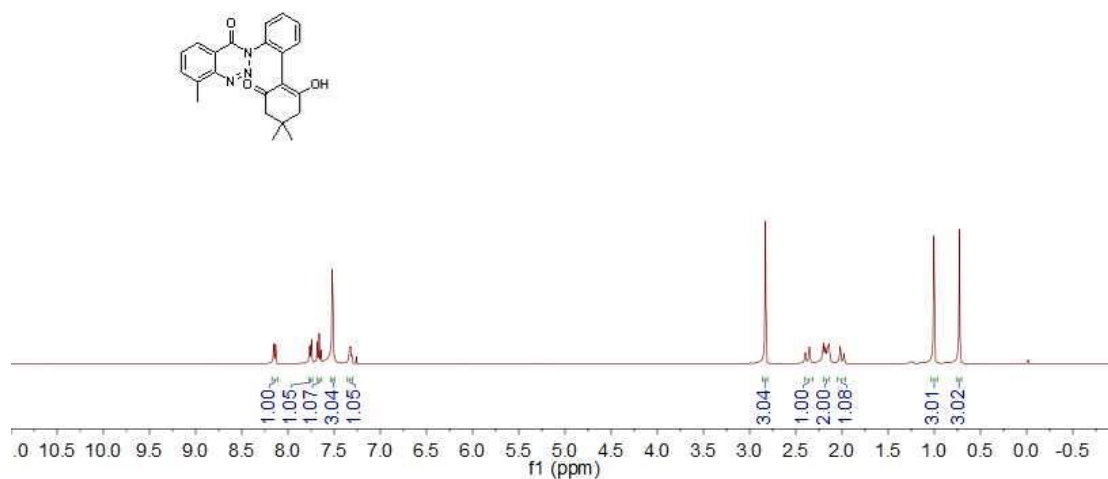

<sup>13</sup>C NMR (101 MHz, CDCl<sub>3</sub>) Spectra of **5ja**

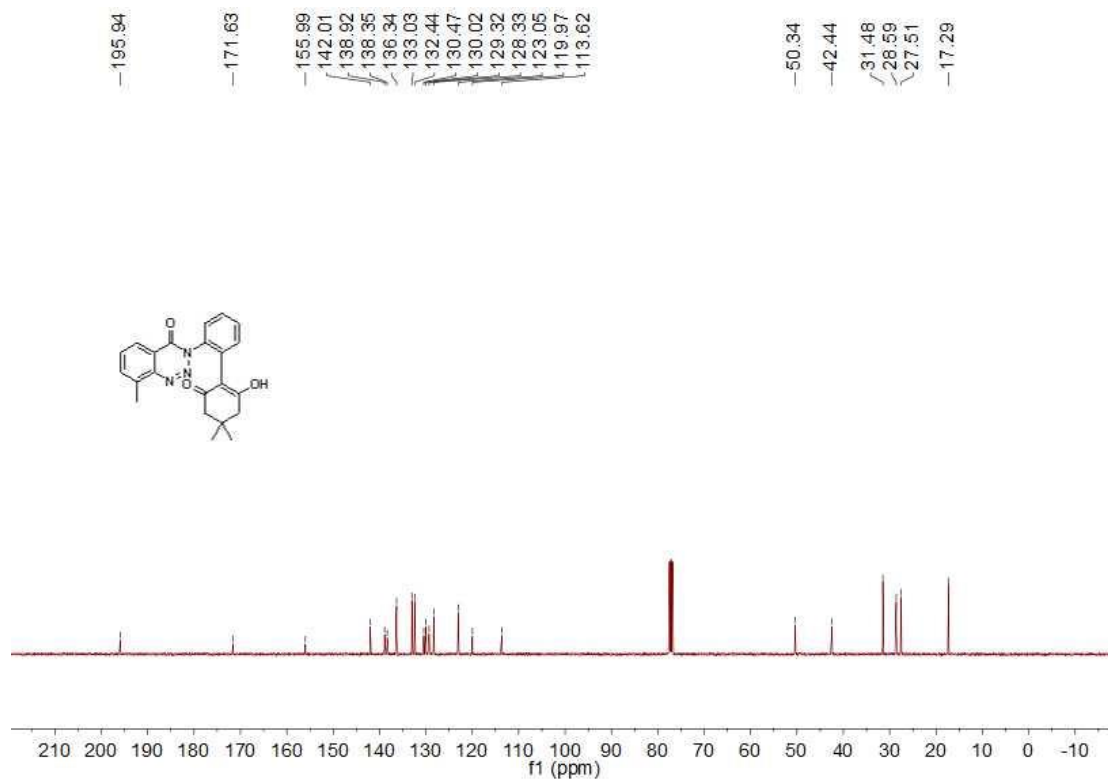



<sup>1</sup>H NMR (400 MHz, DMSO-*d*<sub>6</sub>) Spectra of **5ab**

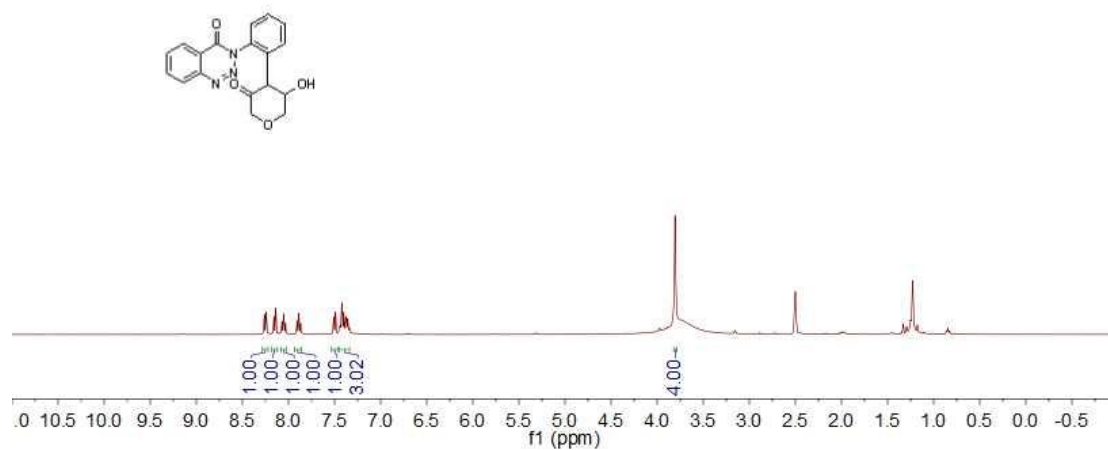

<sup>13</sup>C NMR (101 MHz, DMSO-*d*<sub>6</sub>) Spectra of **5ab**

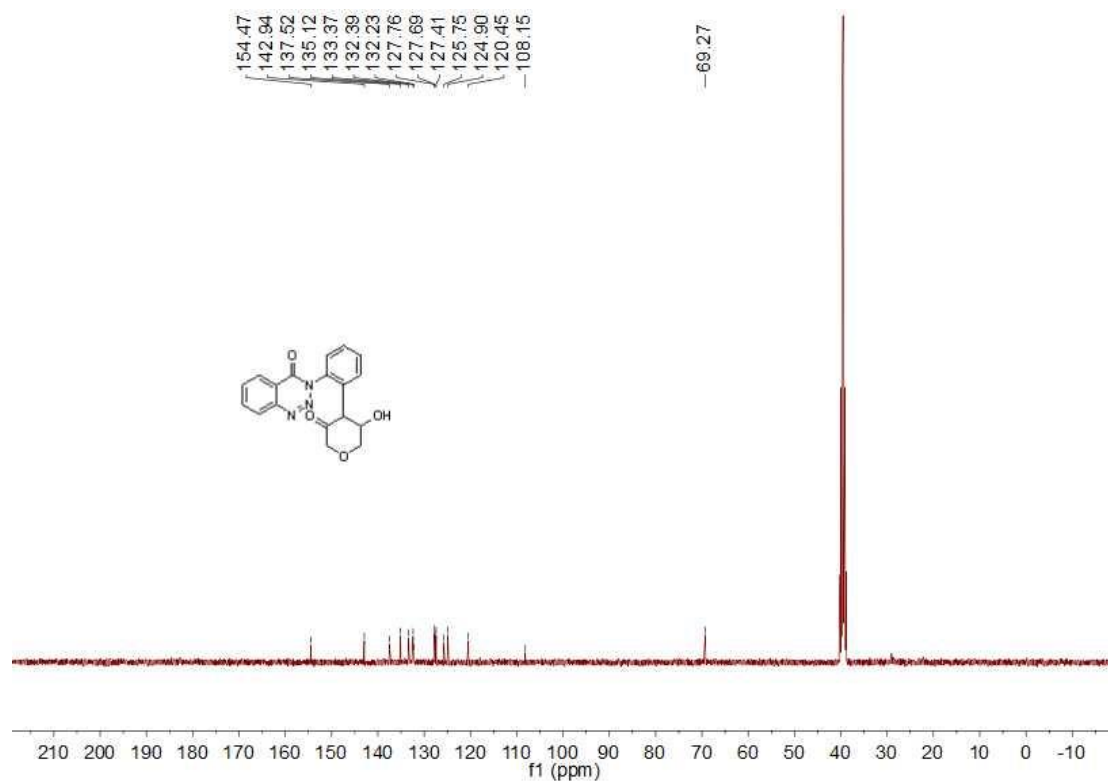

<sup>1</sup>H NMR (400 MHz, CDCl<sub>3</sub>) Spectra of **5ac**

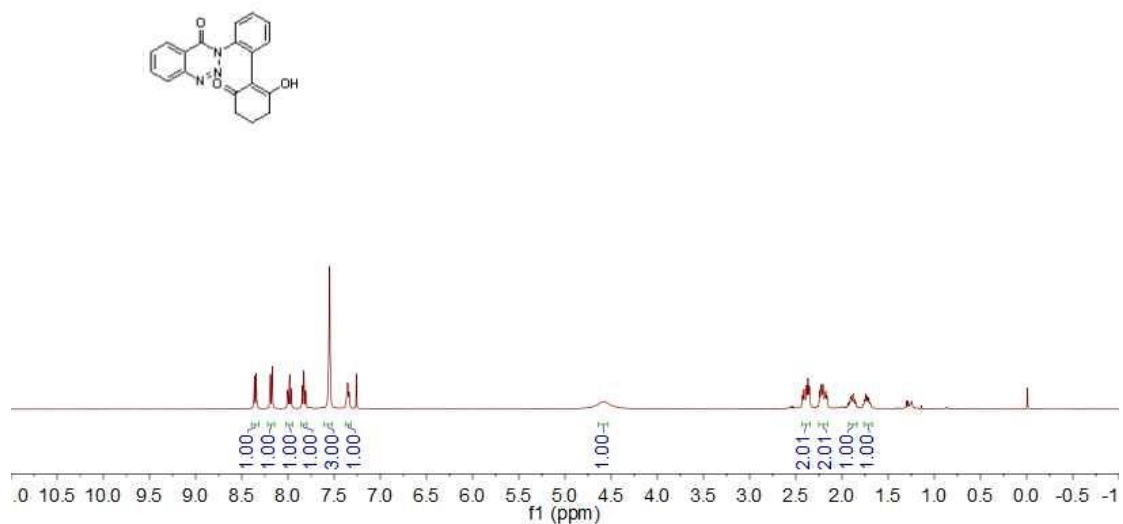

<sup>13</sup>C NMR (101 MHz, CDCl<sub>3</sub>) Spectra of **5ac**

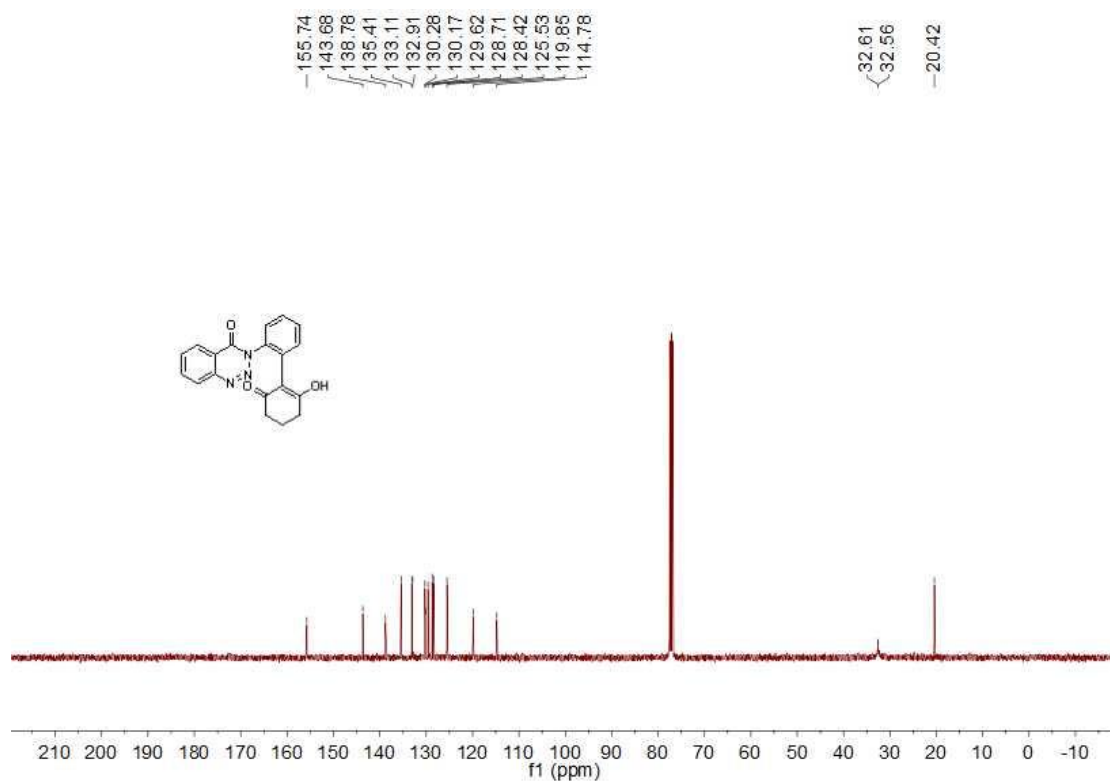

<sup>1</sup>H NMR (400 MHz, DMSO-*d*<sub>6</sub>) Spectra of **5ad**

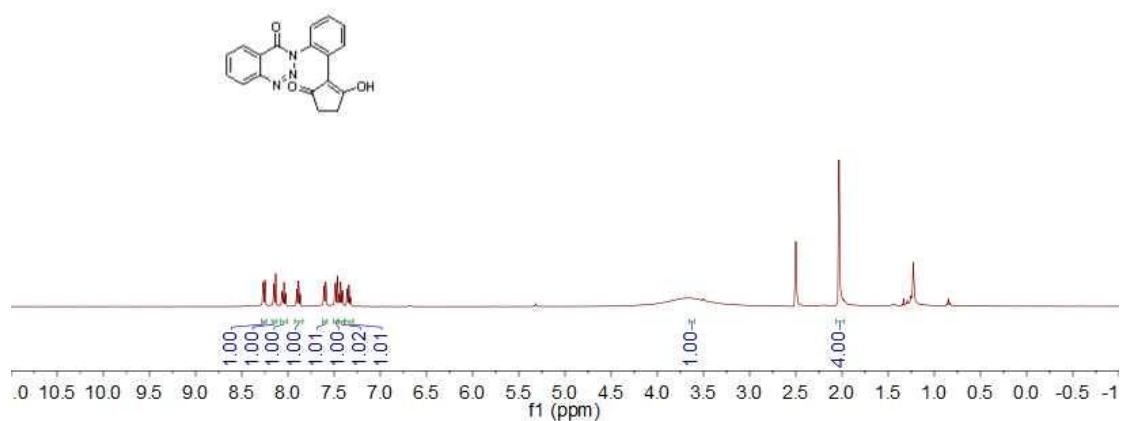

<sup>13</sup>C NMR (101 MHz, DMSO-*d*<sub>6</sub>) Spectra of **5ad**

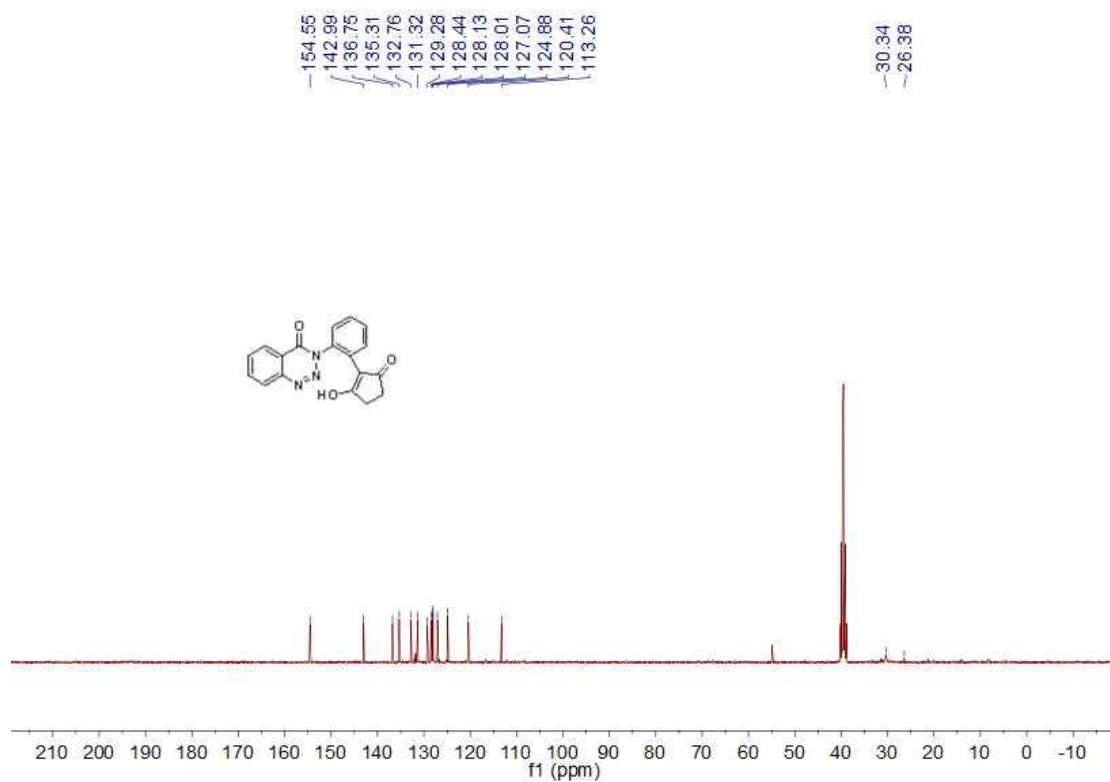

<sup>1</sup>H NMR (400 MHz, DMSO-*d*<sub>6</sub>) Spectra of **6aa**

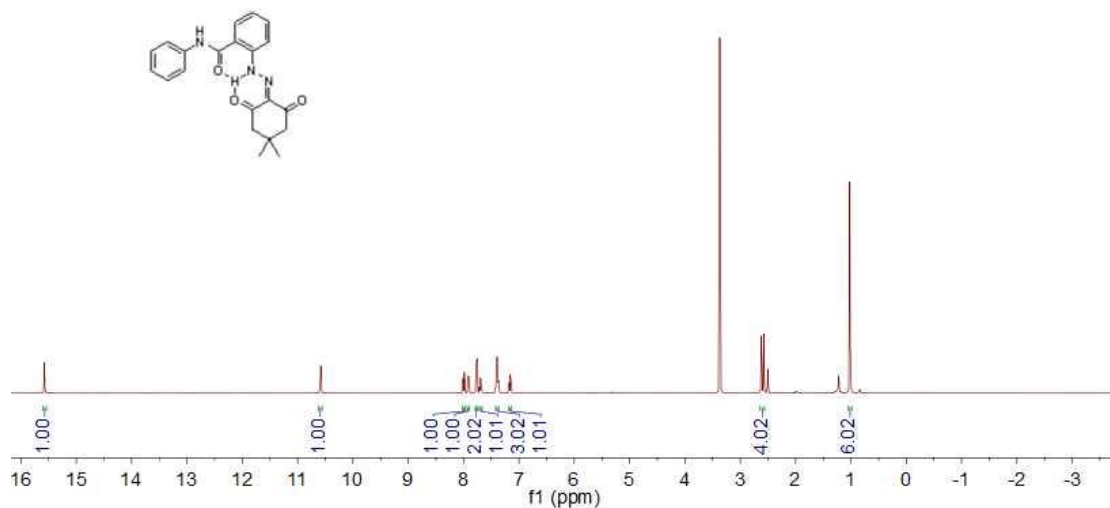

<sup>13</sup>C NMR (101 MHz, DMSO-*d*<sub>6</sub>) Spectra of **6aa**

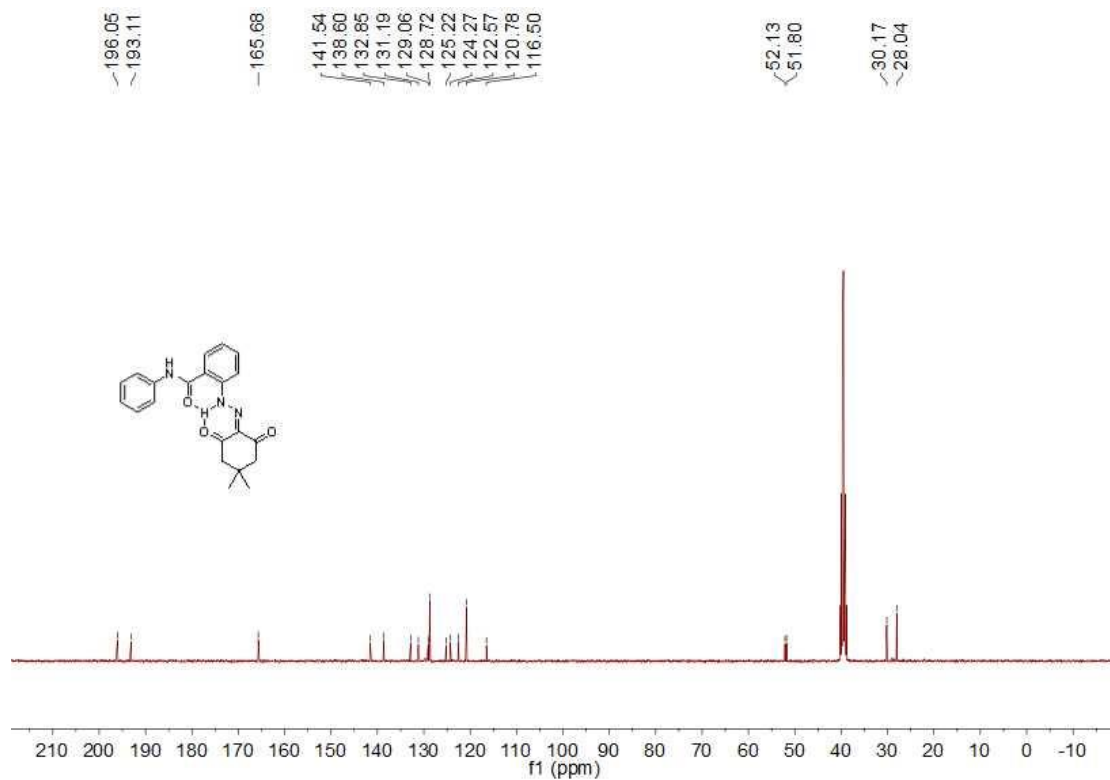

<sup>1</sup>H NMR (400 MHz, DMSO-*d*<sub>6</sub>) Spectra of **6ab**

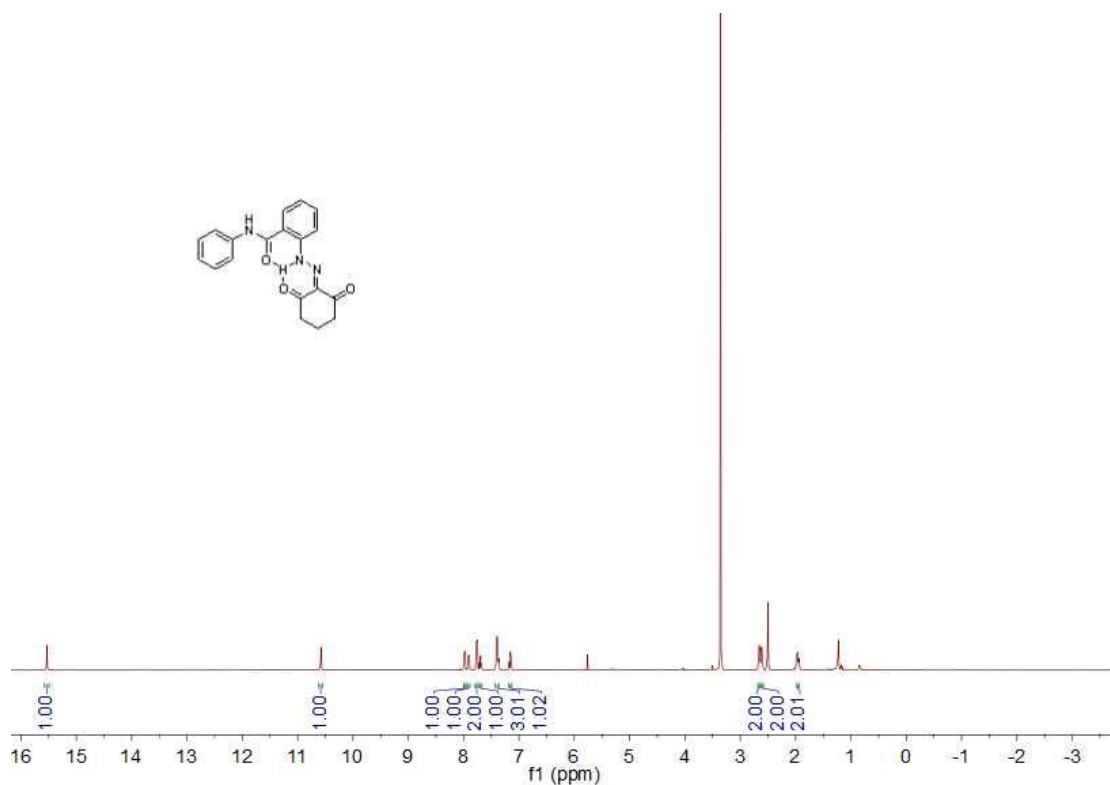

<sup>13</sup>C NMR (101 MHz, DMSO-*d*<sub>6</sub>) Spectra of **6ab**

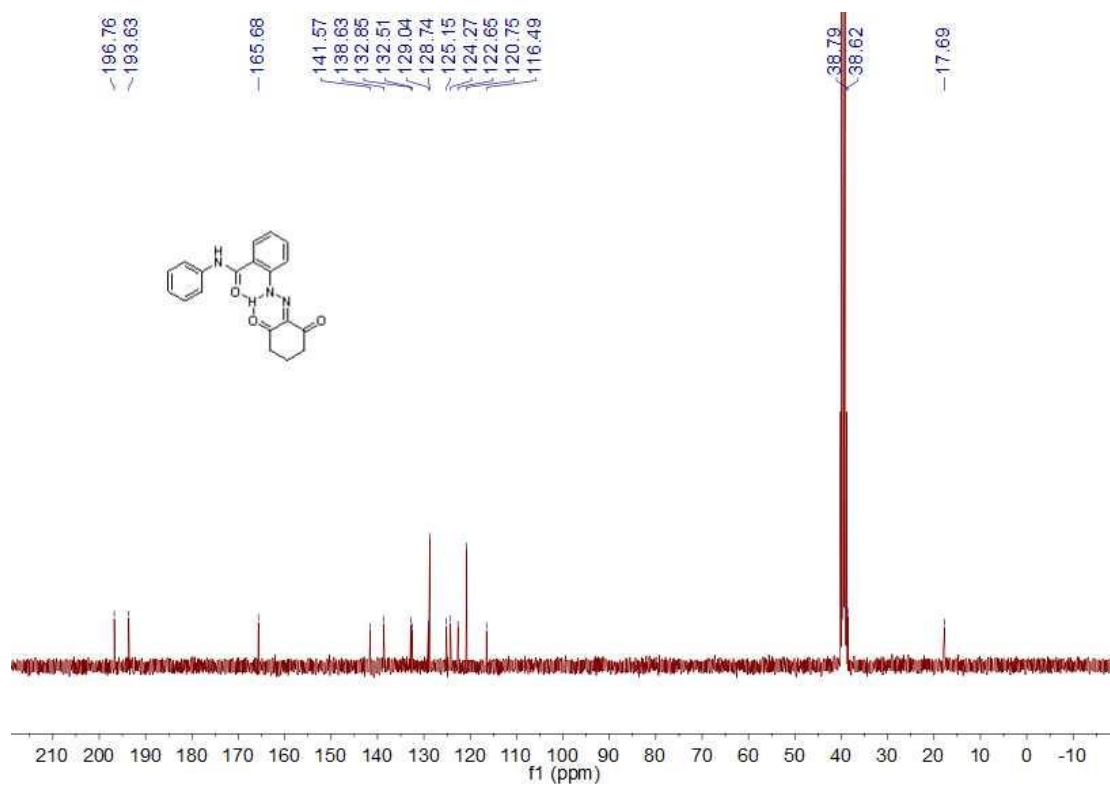

<sup>1</sup>H NMR (400 MHz, DMSO-*d*<sub>6</sub>) Spectra of **6ac**

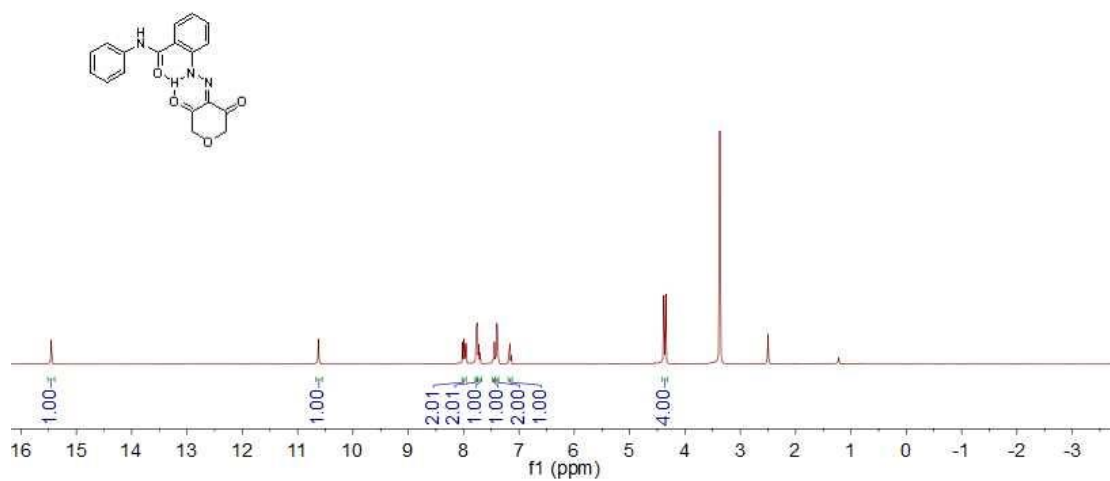

<sup>13</sup>C NMR (101 MHz, DMSO-*d*<sub>6</sub>) Spectra of **6ac**

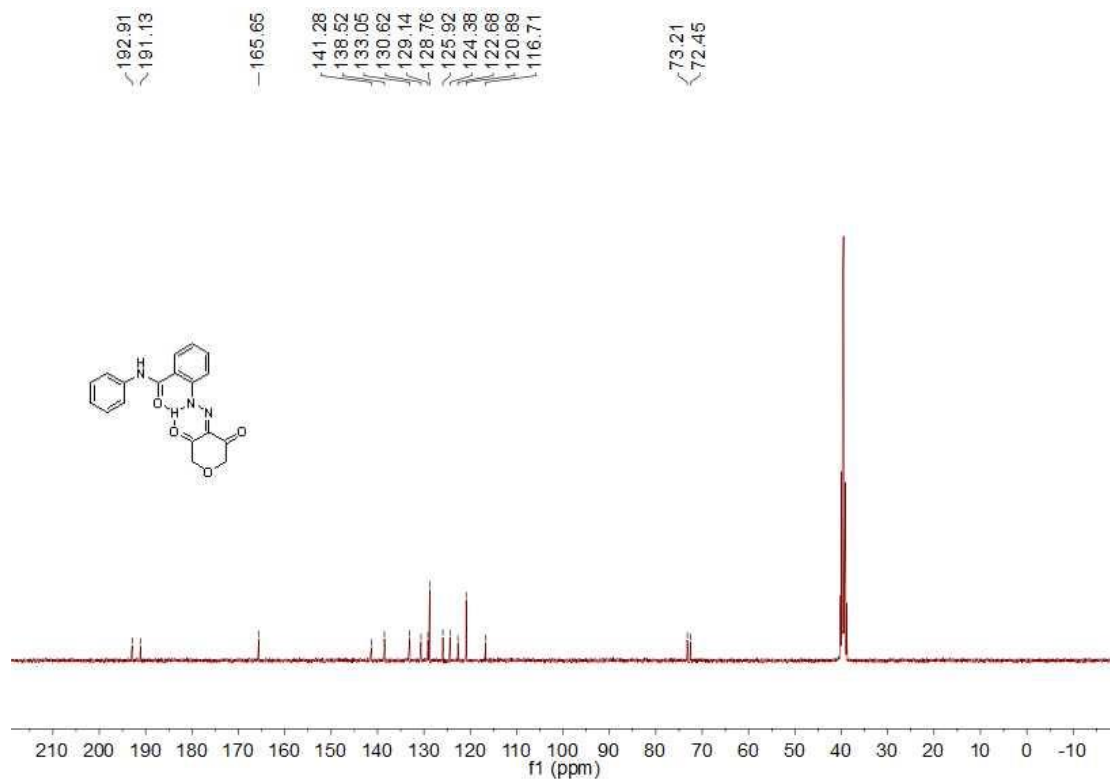

<sup>1</sup>H NMR (400 MHz, DMSO-*d*<sub>6</sub>) Spectra of **6bb**

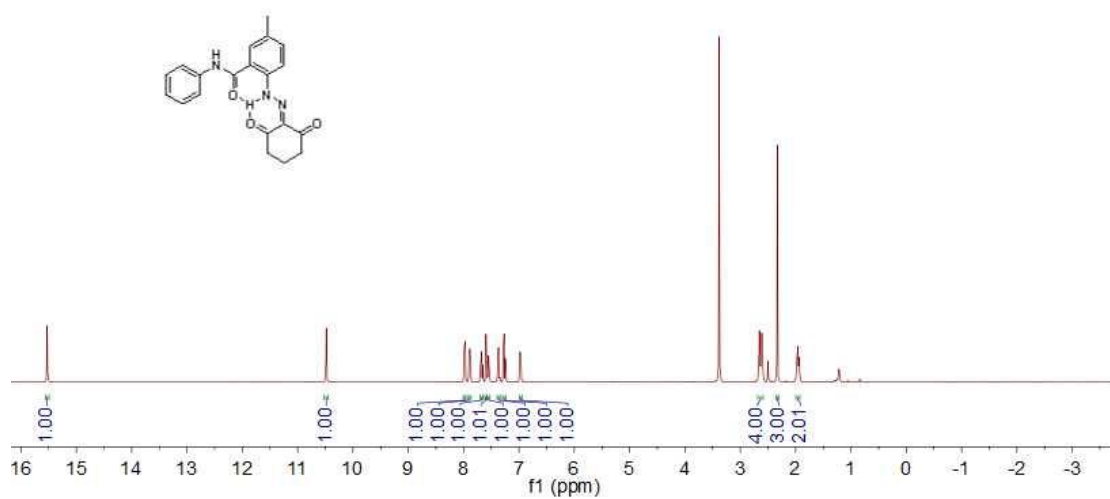

<sup>13</sup>C NMR (101 MHz, DMSO-*d*<sub>6</sub>) Spectra of **6bb**

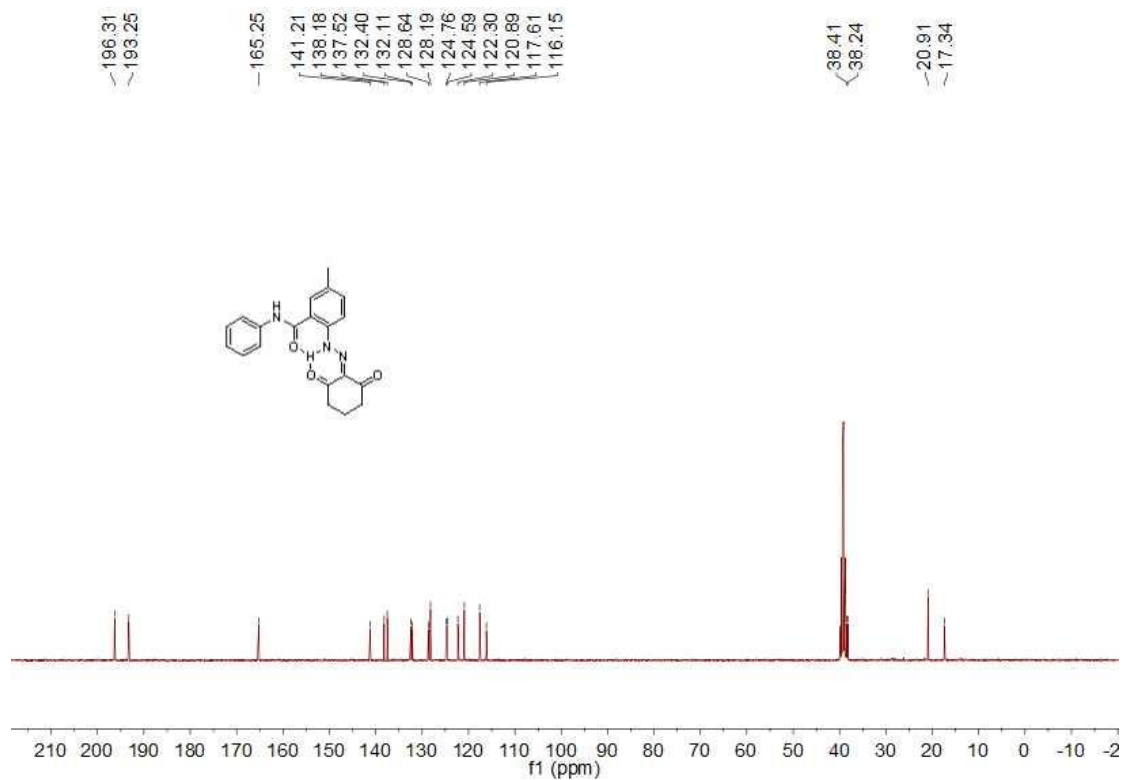

<sup>1</sup>H NMR (400 MHz, DMSO-*d*<sub>6</sub>) Spectra of **6cb**

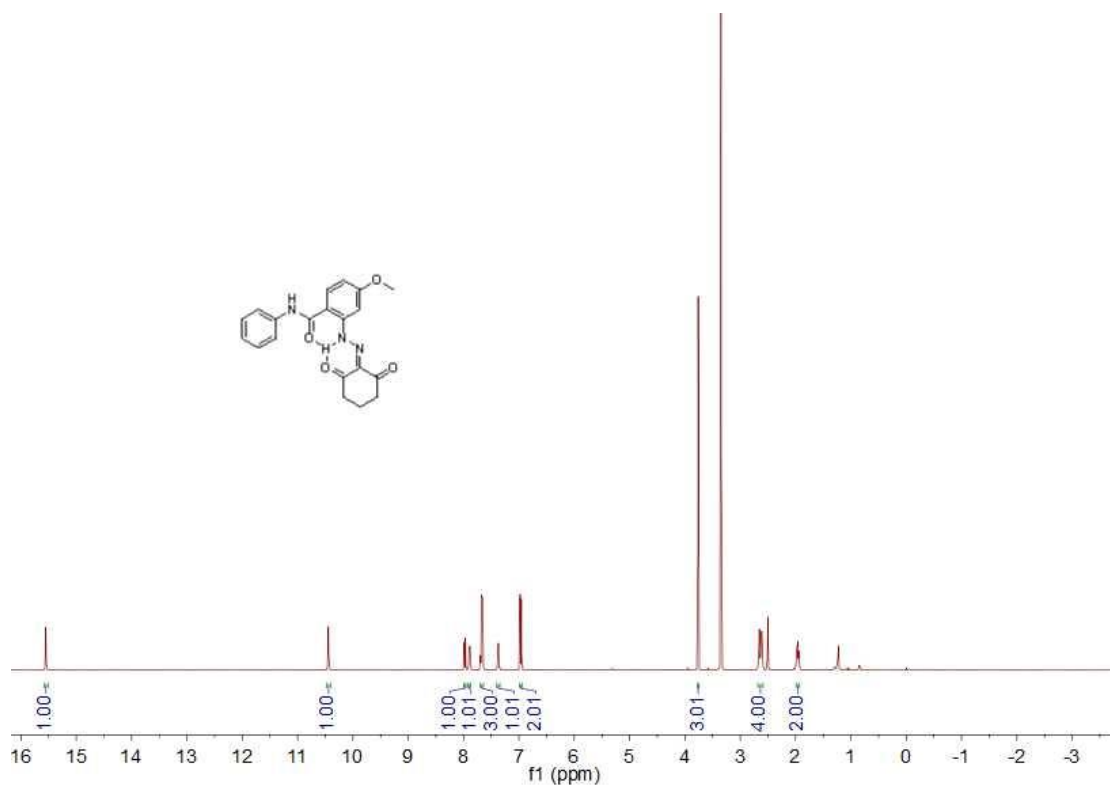

<sup>13</sup>C NMR (101 MHz, DMSO-*d*<sub>6</sub>) Spectra of **6cb**

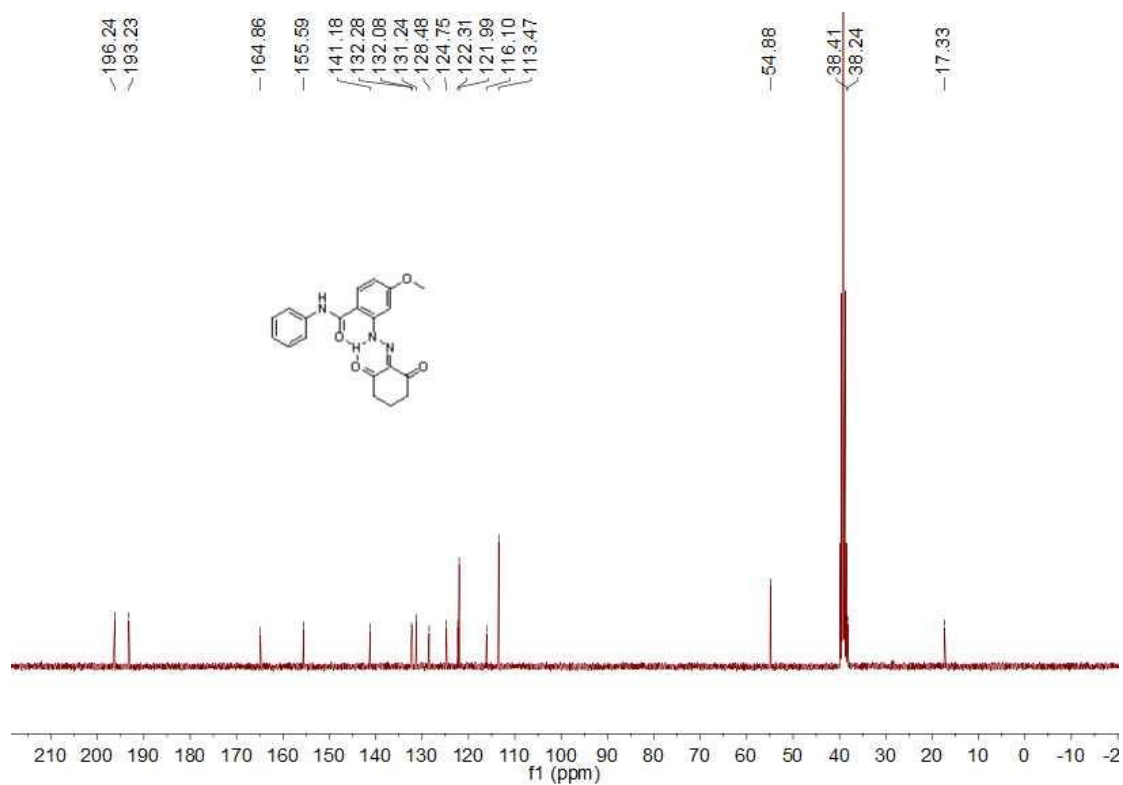



<sup>1</sup>H NMR (400 MHz, DMSO-*d*<sub>6</sub>) Spectra of **6db**

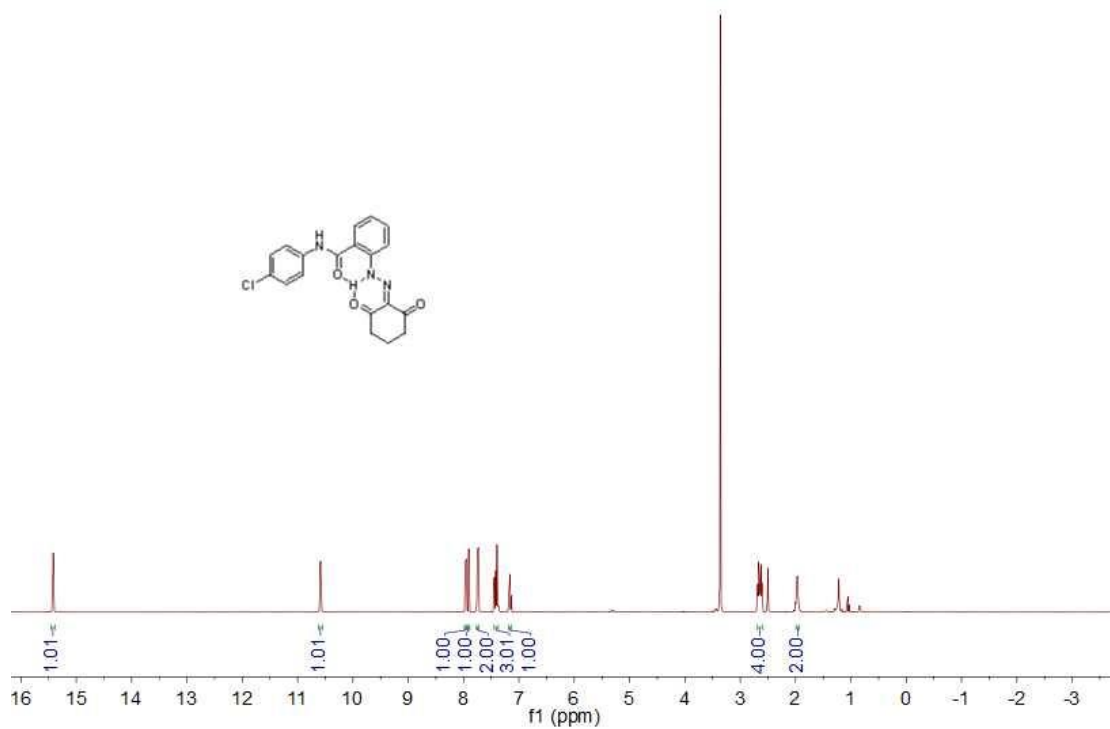

<sup>13</sup>C NMR (101 MHz, DMSO-*d*<sub>6</sub>) Spectra of **6db**

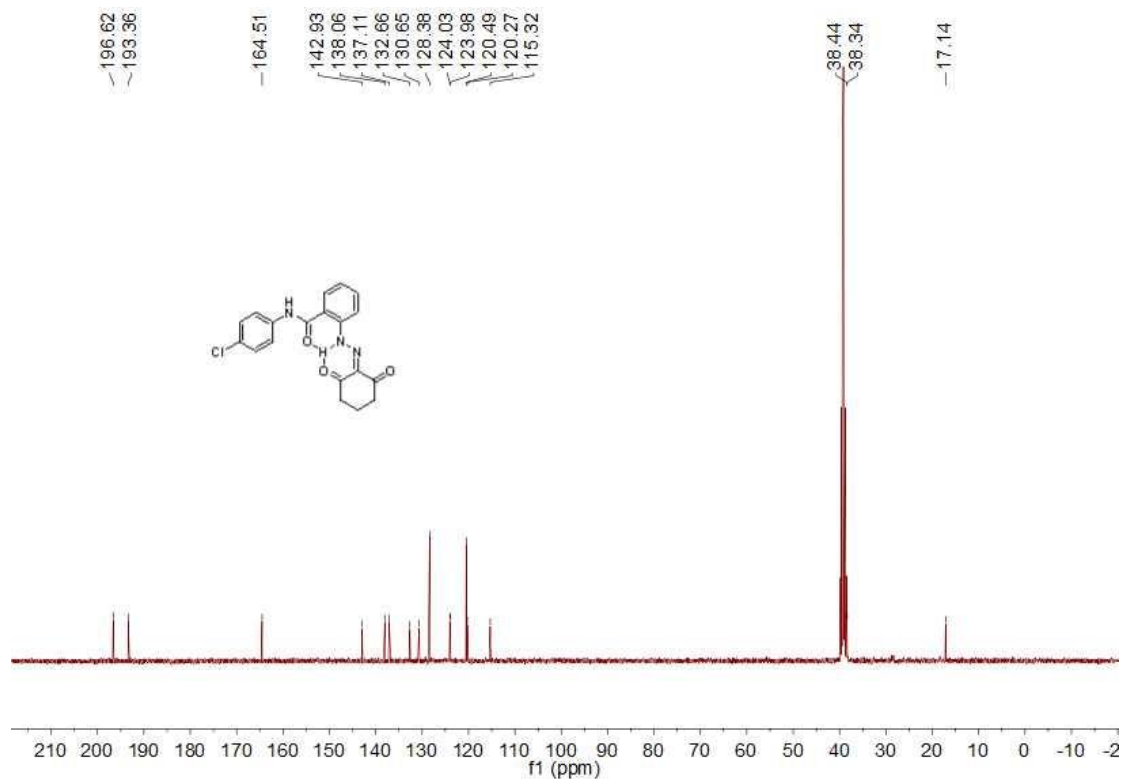

<sup>1</sup>H NMR (400 MHz, DMSO-*d*<sub>6</sub>) Spectra of **6b**

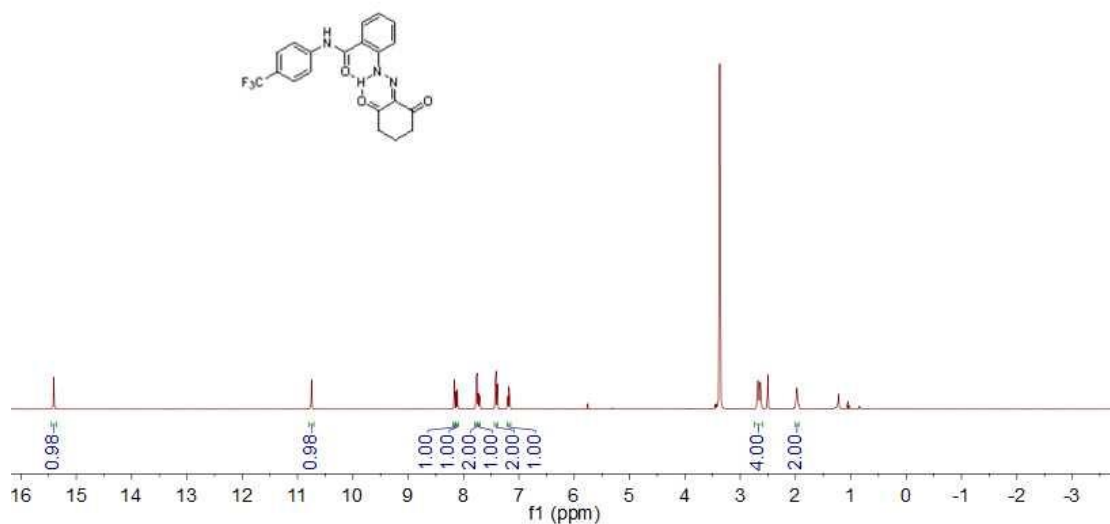

<sup>13</sup>C NMR (101 MHz, DMSO-*d*<sub>6</sub>) Spectra of **6b**

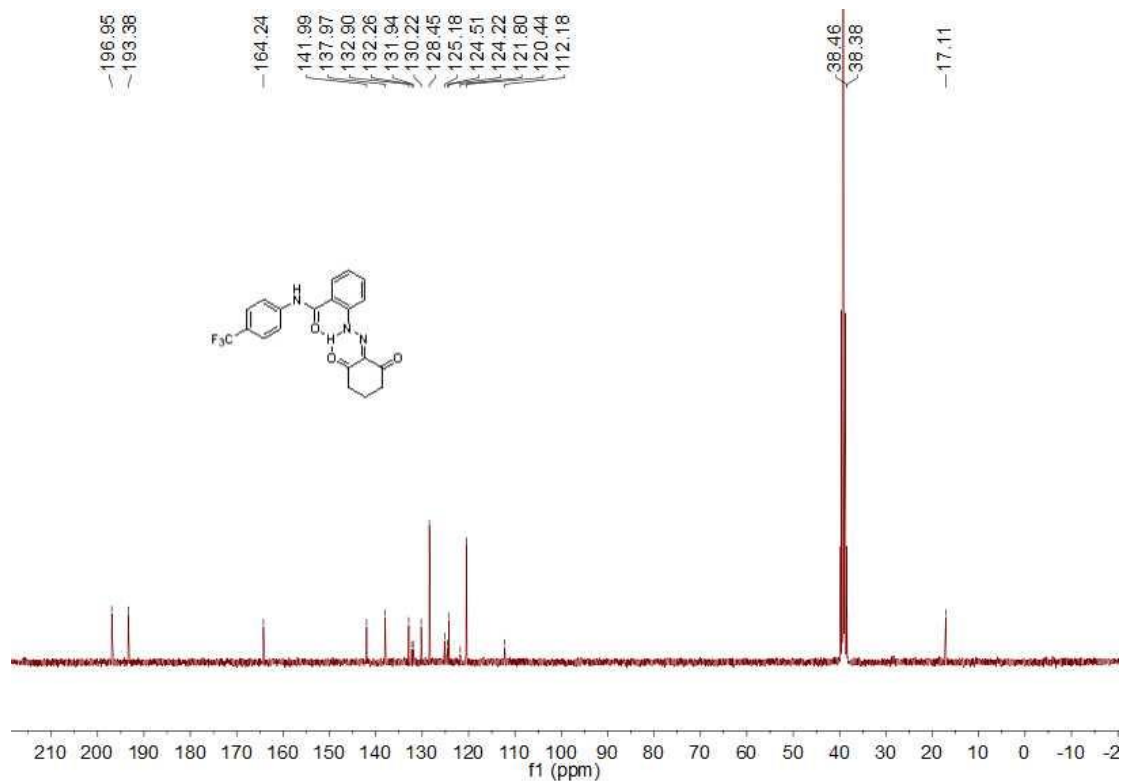

<sup>19</sup>F NMR (376 MHz, DMSO-*d*<sub>6</sub>) Spectra of **6eb**

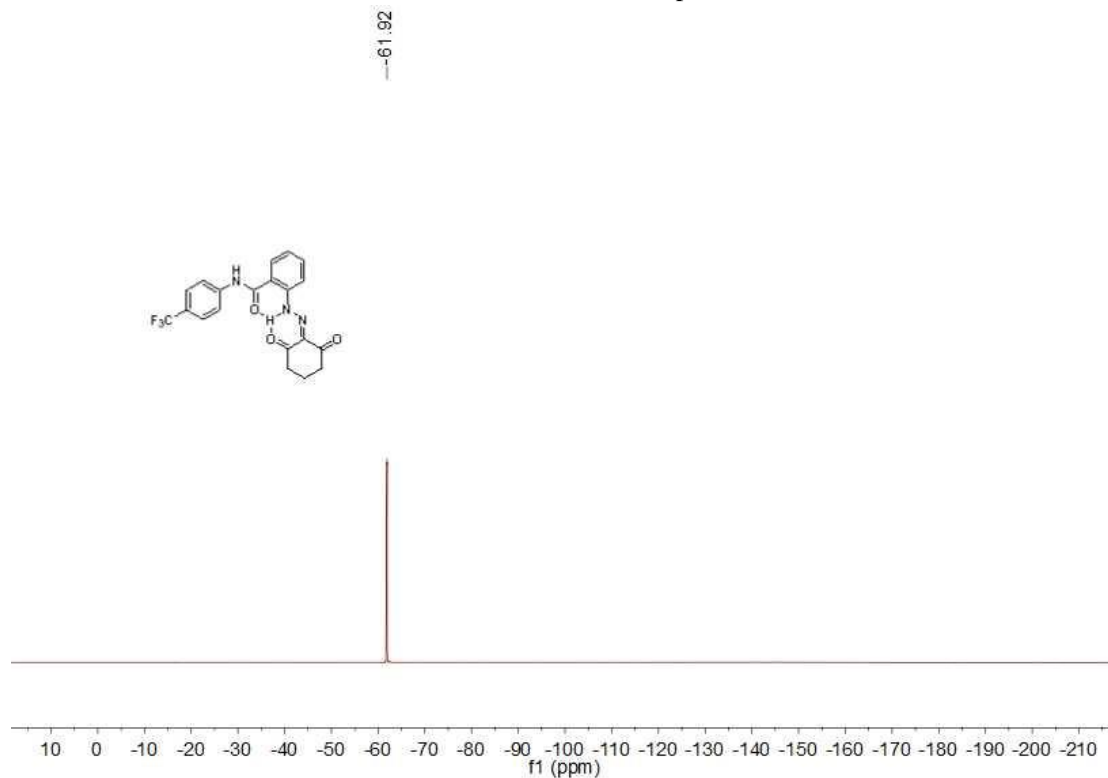

<sup>1</sup>H NMR (400 MHz, DMSO-*d*<sub>6</sub>) Spectra of **6fb**

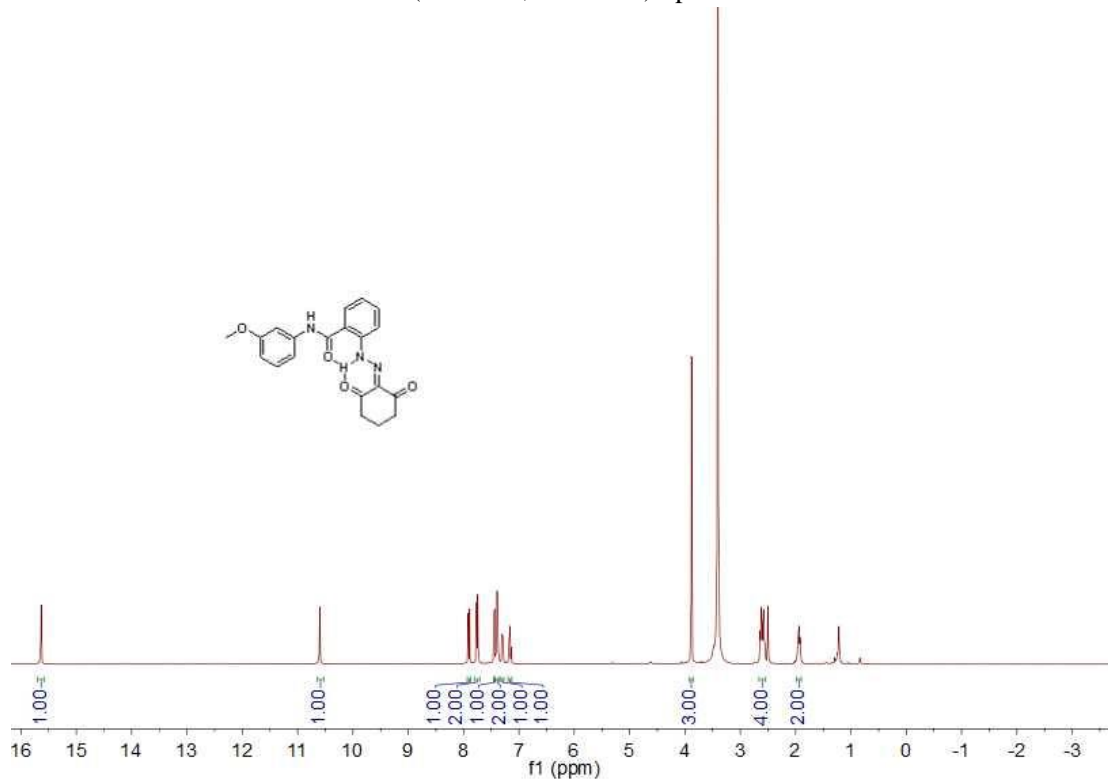

<sup>13</sup>C NMR (101 MHz, DMSO-*d*<sub>6</sub>) Spectra of **6fb**

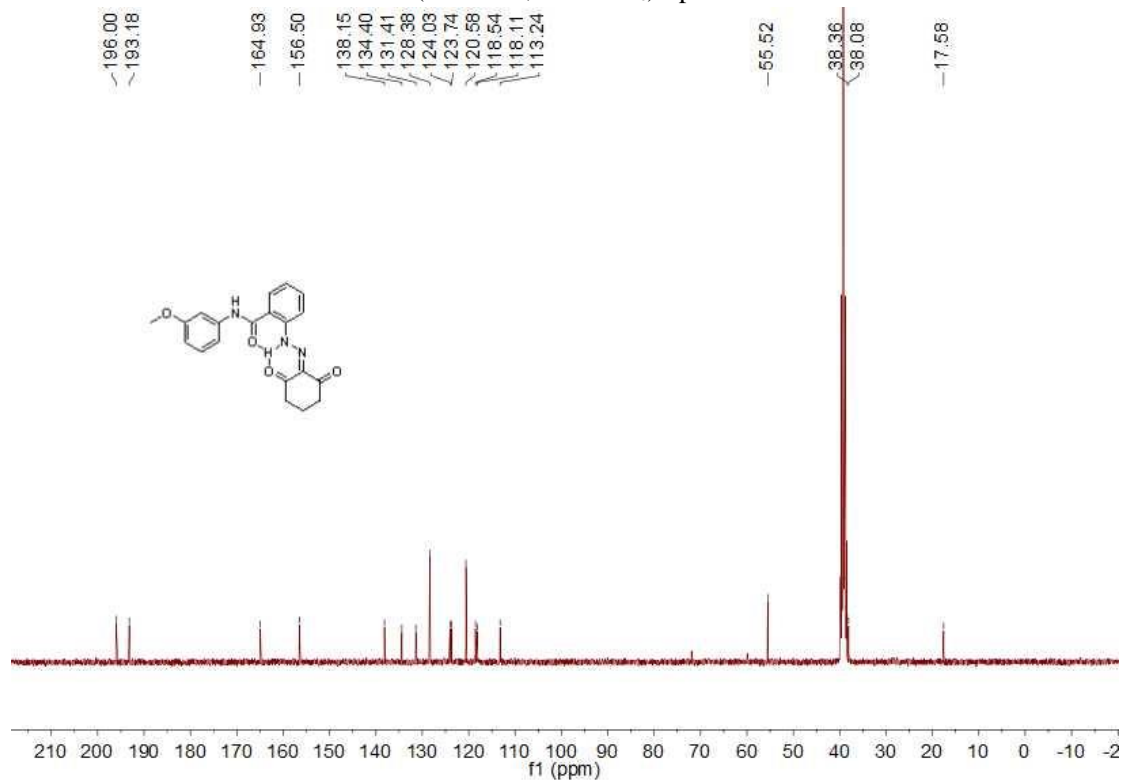

<sup>1</sup>H NMR (400 MHz, DMSO-*d*<sub>6</sub>) Spectra of **6gb**

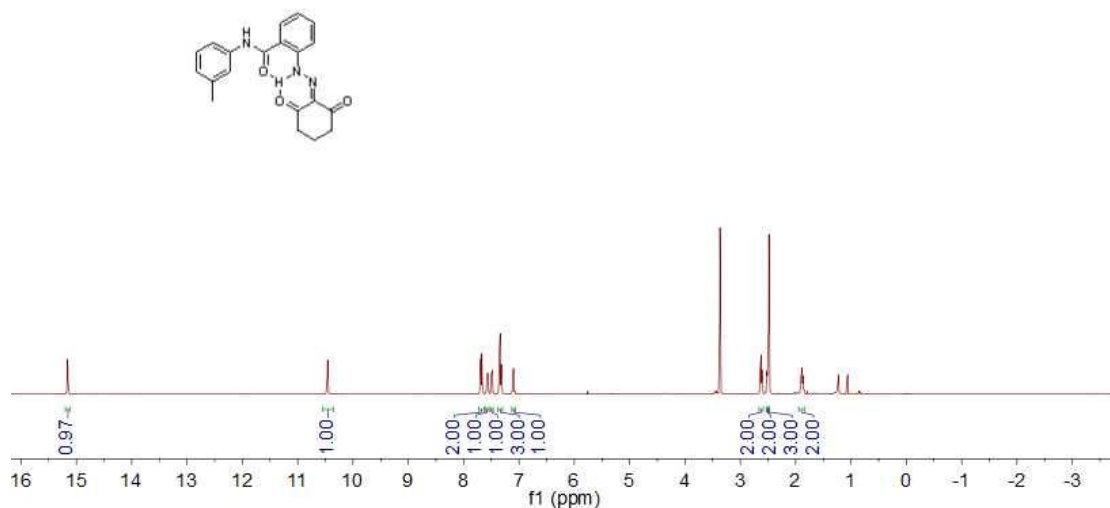

<sup>13</sup>C NMR (101 MHz, DMSO-*d*<sub>6</sub>) Spectra of **6gb**

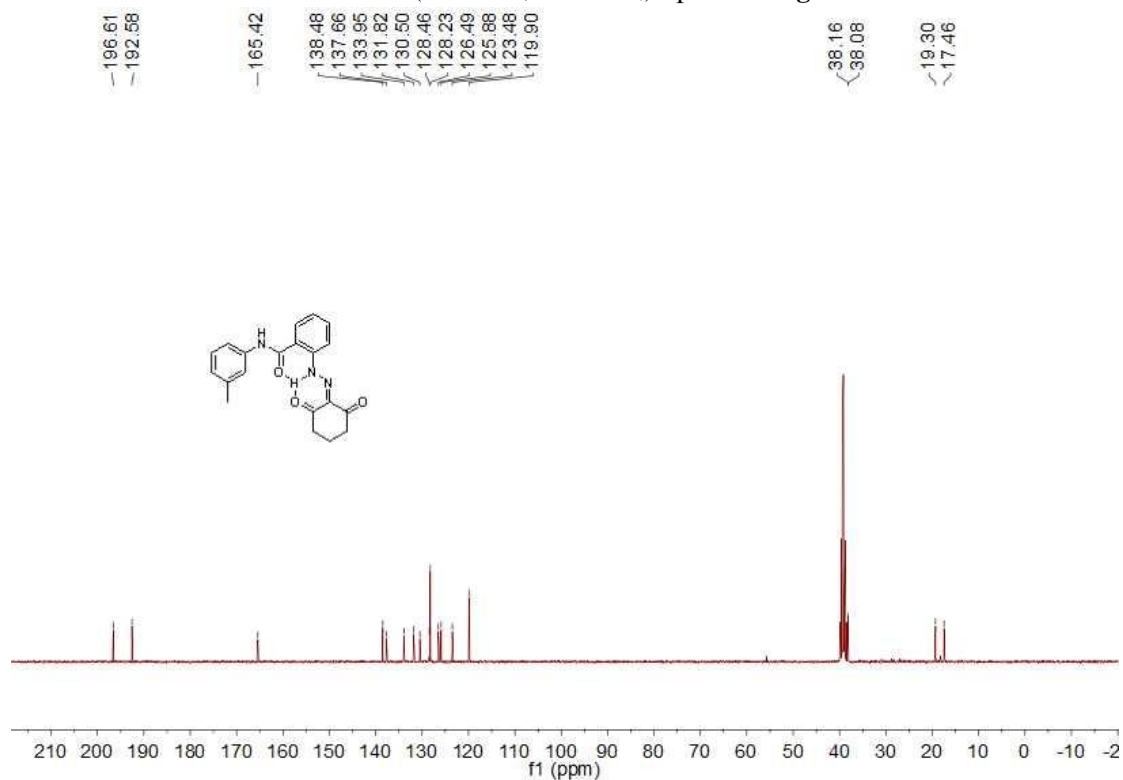

<sup>1</sup>H NMR (400 MHz, DMSO-*d*<sub>6</sub>) Spectra of **6hb**

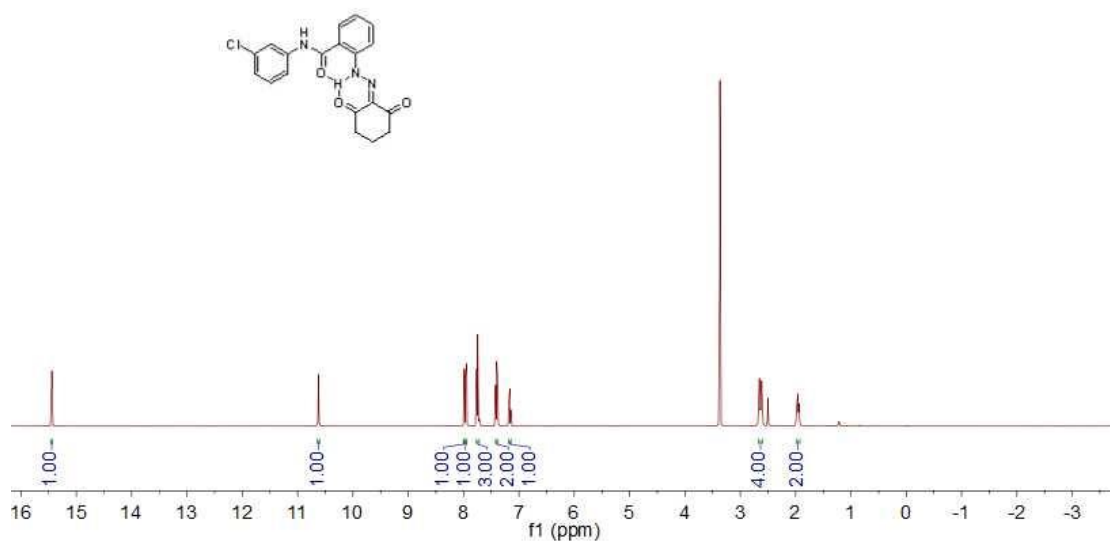

<sup>13</sup>C NMR (101 MHz, DMSO-*d*<sub>6</sub>) Spectra of **6hb**

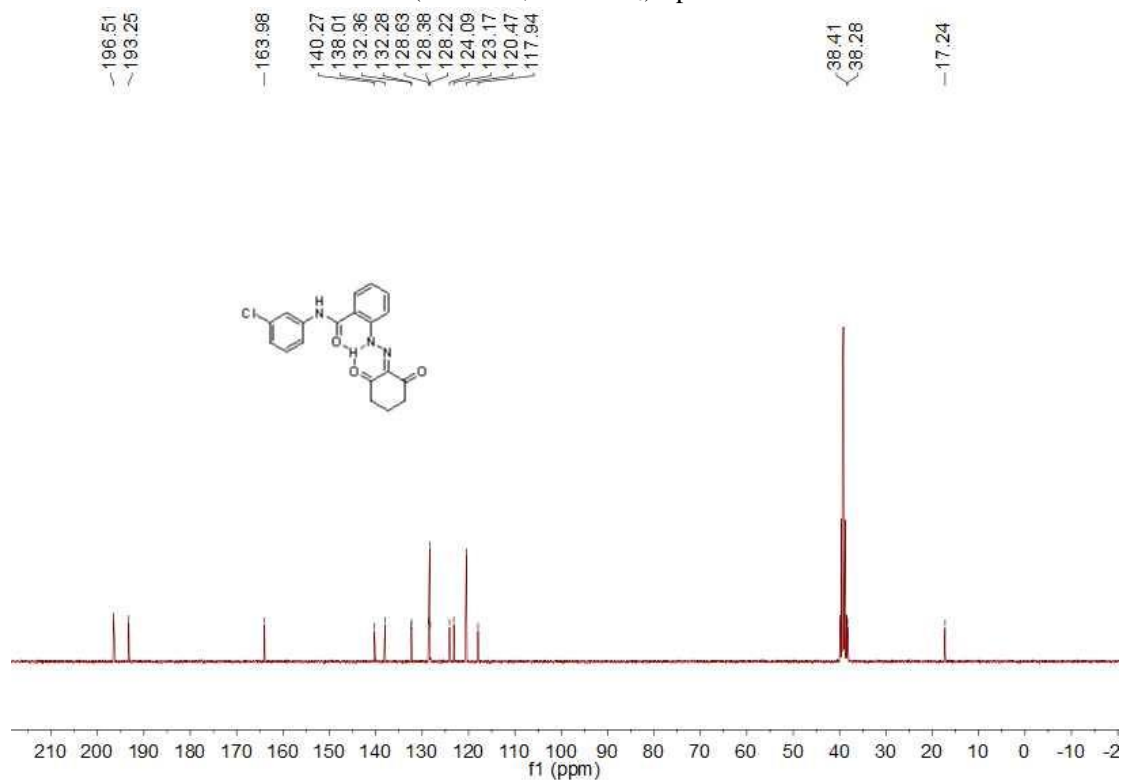

<sup>1</sup>H NMR (400 MHz, DMSO-*d*<sub>6</sub>) Spectra of **6ib**

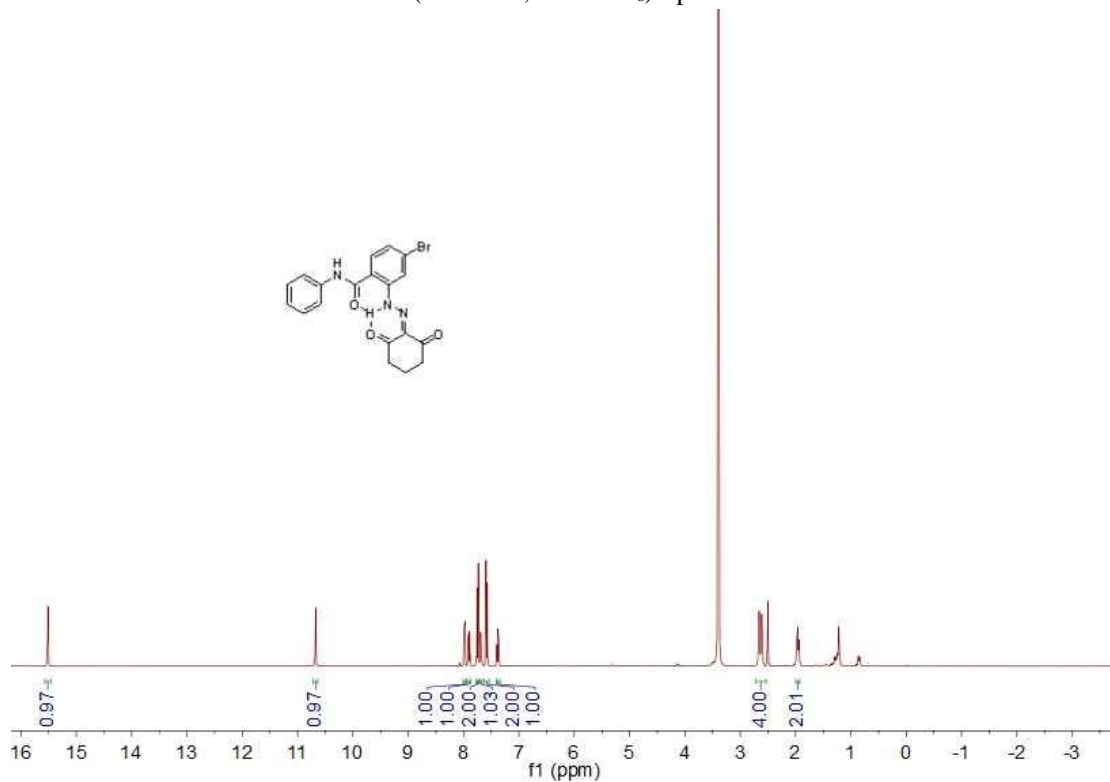

<sup>13</sup>C NMR (101 MHz, DMSO-*d*<sub>6</sub>) Spectra of **6ib**

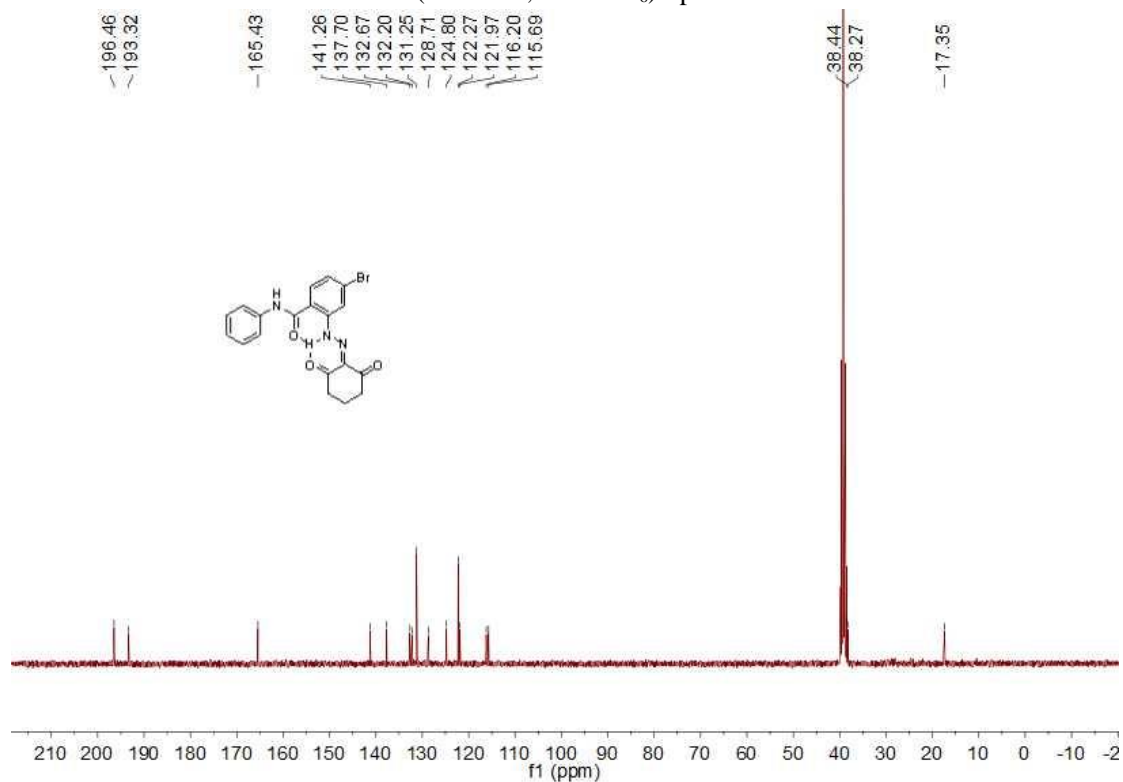

<sup>1</sup>H NMR (400 MHz, DMSO-*d*<sub>6</sub>) Spectra of **6jb**

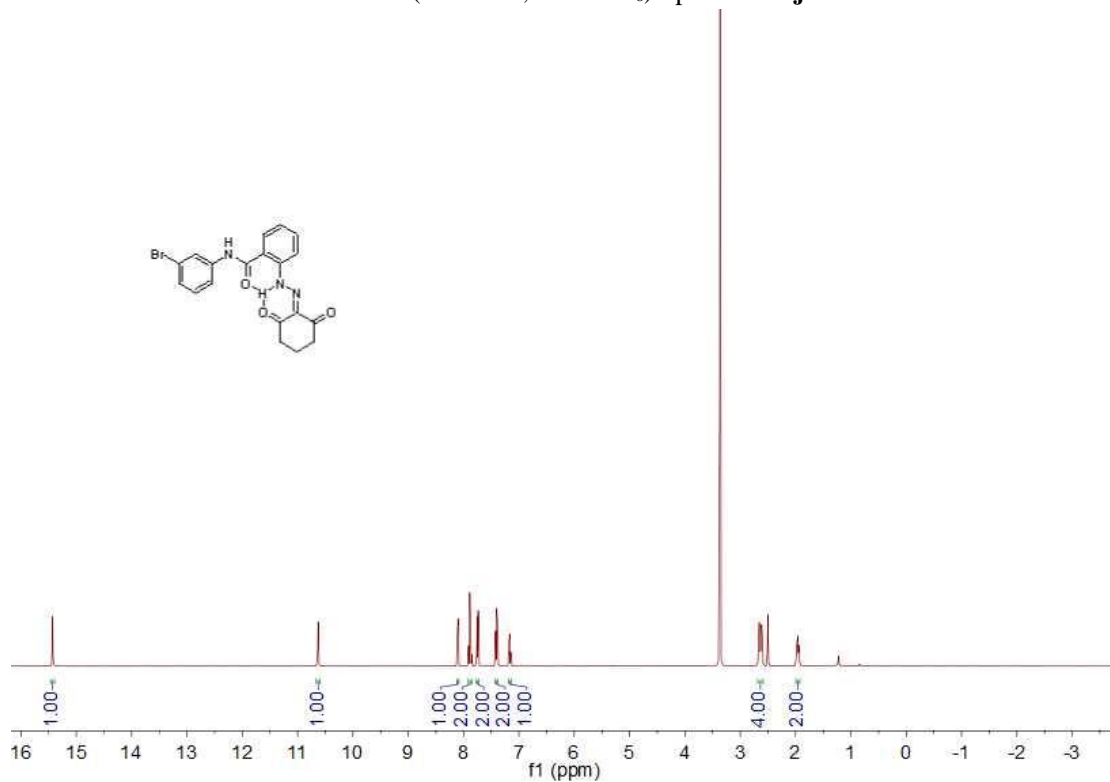

<sup>13</sup>C NMR (101 MHz, DMSO-*d*<sub>6</sub>) Spectra of **6jb**

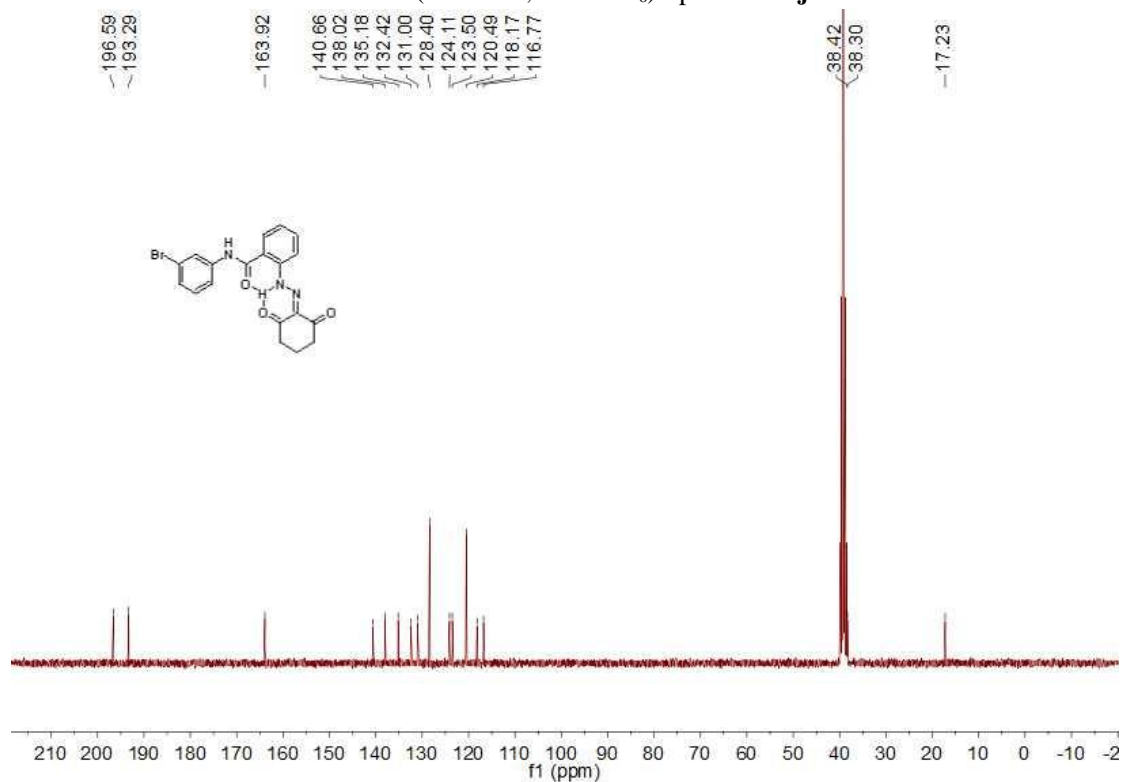



## 9. Reference

- [1] Wang, H.; Yu, S. *Org. Lett.* **2015**, *17*, 4272-4275.
- [2] S.-S. Zhang, H. Xie, B. Shu, T. Che, X.-T. Wang, D.-M. Peng, F. Yang, L.-Y. Zhang. *Chem. Commun.*, **2020**, *56*, 423-426.
- [3] F. Wu, L. Xiao, H. Xie, et al. *Org. Biomol. Chem.*, **2022**, *20*, 5055-5059.
